# Supplementary material for: A thermal decarboxylative Cloke–Wilson rearrangement of dispirocyclopropanes derived from para-quinone methides and bromo-Meldrum's acids: an approach to synthesize spirobutyrolactone para-dienones
Source: Royal Society of Chemistry journal article supplement (doi:10.1039/d0qo00770f), 2020-01-01
Supplement: d0qo00770f1.pdf [file d0qo00770f1.pdf]

**Thermal Decarboxylative Cloke-Wilson Rearrangement of Dispirocyclopropanes  
Derived from *para*-Quinone Methides and Bromo-Meldrum's Acids: An  
Approach to Spirobutyrolactone *para*-Dienones**

Tong Li,<sup>†</sup> Dandan Yan,<sup>‡</sup> Chaoxing Cui,<sup>†</sup> Xixi Song,<sup>\*,†</sup> Junbiao Chang<sup>\*,†</sup>

<sup>†</sup>College of Chemistry, Zhengzhou University

No.100 Science Avenue, Zhengzhou 450001, China

<sup>‡</sup>Shanghai Gengcai New Material Technology Co. Ltd

No. 1288 Zhongchun Road, Minhang District, Shanghai 201108, China

\*Email: xixisong@zzu.edu.cn; changjunbiao@zzu.edu.cn

## Table of Contents

|                                                                            |       |
|----------------------------------------------------------------------------|-------|
| General Information.....                                                   | SI-3  |
| General Procedure for the Synthesis of Dispirocyclopropanes <b>3</b> ..... | SI-4  |
| Spectroscopic Data of Dispirocyclopropanes <b>3</b> .....                  | SI-5  |
| General Procedure for the Synthesis of Spirobutyrolactones <b>4</b> .....  | SI-13 |
| Spectroscopic Data of Spirobutyrolactones <b>4</b> .....                   | SI-14 |
| References.....                                                            | SI-21 |
| NMR Spectra of Dispirocyclopropanes <b>3</b> .....                         | SI-22 |
| NMR Spectra of Spirobutyrolactones <b>4</b> .....                          | SI-42 |

## General Information

Reagents and solvents were purchased from commercial sources and used without further purification. The *para*-quinone methides and bromo-Meldrum's acids were prepared according to the known literatures.<sup>1,2</sup> TLC was performed on dry silica gel plates (10-40  $\mu\text{m}$ , from Yantai Dexin Biotechnology Co. Ltd.) eluting with petroleum ether (bp 60-90  $^{\circ}\text{C}$ ) and ethyl acetate. Flash column chromatography was performed over silica gel (200-300 mesh, from Henan Sanlian Science and Trade Co. Ltd.). Melting points were determined using a XT4A hot-stage apparatus. IR spectra were obtained using an IFS25 FT-IR spectrometer. NMR spectra ( $^1\text{H}$  and  $^{13}\text{C}$ ) were recorded on a Bruker AV400 spectrometer (400 MHz for  $^1\text{H}$  NMR and 100 MHz for  $^{13}\text{C}$  NMR) using  $\text{CDCl}_3$  as the solvent (referenced internally to  $\text{Me}_4\text{Si}$ );  $J$  values were given in Hertz. High-resolution mass spectra were recorded on a Micromass Q-TOF mass spectrometer. X-ray crystal structure analysis was performed using a MM007HF Saturn 724+ spectrometer.

### General Procedure for the Synthesis of Dispirocyclopropanes **3**

The solution of 0.1 mmol of *para*-quinone methide **1** (1 equiv.), 0.3 mmol of bromo-Meldrum's acid **2** (3 equiv.), and 0.2 mmol of DBU (2 equiv.) in 0.5 mL of DCM (0.2 *M*) was stirred at 15 °C. The reaction process was monitored by TLC analysis. After the reaction was finished, the reaction mixture was quenched with saturated ammonium chloride (2 mL). The mixture was then extracted with diethyl ether (3 × 5 mL). The combined organic phase was washed with brine (10 mL), dried using anhydrous Na<sub>2</sub>SO<sub>4</sub>, and then filtered. The solvent was removed under vacuum, and the crude was purified by flash column chromatography (silica gel, petroleum ether/EtOAc = 20/1) to give the desired product **3**.

### Spectroscopic Data of Dispirocyclopropanes 3

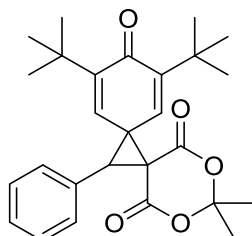

*9,11-Di-tert-butyl-3,3-dimethyl-13-phenyl-2,4-dioxadispiro[5.0.5<sup>7</sup>.1<sup>6</sup>]trideca-8,11-diene-1,5,10-trione (3aa)*. Yellow solid; yield: 41.9 mg (96%); mp 85-87 °C; <sup>1</sup>H NMR (400 MHz, CDCl<sub>3</sub>, TMS, 25 °C): δ = 7.36-7.35 (m, 3H), δ = 7.17-7.16 (m, 2H), δ = 6.69 (d, J = 2.3 Hz, 1H), δ = 6.60 (d, J = 2.3 Hz, 1H), δ = 4.63 (s, 1H), δ = 1.74 (s, 3H), δ = 1.33 (s, 3H), δ = 1.26 (s, 9H), δ = 1.19 (s, 9H); <sup>13</sup>C{<sup>1</sup>H} NMR (100MHz, CDCl<sub>3</sub>, 25 °C): δ = 184.6, 164.5, 161.8, 153.8, 153.3, 134.5, 131.8, 130.6, 129.3, 128.0, 104.9, 46.2, 43.9, 42.3, 36.0, 35.7, 29.2, 29.2, 27.5, 26.9 ppm; HRMS (ESI/Q-TOF) m/z: [M + Na]<sup>+</sup> Calcd for C<sub>27</sub>H<sub>32</sub>O<sub>5</sub>Na 459.2142; Found 459.2143.

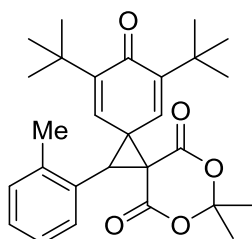

*9,11-Di-tert-butyl-3,3-dimethyl-13-(o-tolyl)-2,4-dioxadispiro[5.0.5<sup>7</sup>.1<sup>6</sup>]trideca-8,11-diene-1,5,10-trione (3ba)*. Yellow solid; yield: 40.5 mg (90%); mp 93-95 °C; <sup>1</sup>H NMR (400 MHz, CDCl<sub>3</sub>, TMS, 25 °C): δ = 7.30-7.26 (m, 1H), δ = 7.23-7.17 (m, 2H), δ = 7.05 (d, J = 7.6 Hz, 1H), δ = 6.79 (d, J = 2.8 Hz, 1H), δ = 6.60 (s, J = 2.8 Hz, 1H), δ = 4.40 (s, 1H), δ = 2.19 (s, 3H), δ = 1.74 (s, 3H), δ = 1.33 (s, 3H), δ = 1.27 (s, 9H), δ = 1.21 (s, 9H); <sup>13</sup>C{<sup>1</sup>H} NMR (100MHz, CDCl<sub>3</sub>, 25 °C): δ = 184.6, 164.4, 162.0, 154.0, 153.0, 137.8, 134.7, 132.2, 130.3, 129.6, 128.7, 128.3, 125.7, 104.9, 46.2, 43.3, 36.0, 35.8, 29.3, 29.3, 27.6, 26.9, 26.8, 19.7 ppm; HRMS (ESI/Q-TOF) m/z: [M + Na]<sup>+</sup> Calcd for C<sub>28</sub>H<sub>34</sub>O<sub>5</sub>Na 473.2298; Found 473.2296.

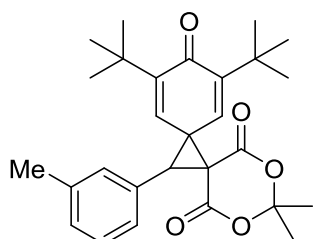

*9,11-Di-tert-butyl-3,3-dimethyl-13-phenyl-2,4-dioxadispiro[5.0.5<sup>7</sup>.1<sup>6</sup>]trideca-8,11-diene-1,5,10-trione (3ca)*. Yellow solid; yield: 43.2 mg (96%); mp 89-91 °C; <sup>1</sup>H NMR (400 MHz, CDCl<sub>3</sub>, TMS, 25 °C): δ = 7.23 (d, J = 8.0 Hz, 1H), δ = 7.14 (d, J = 7.6 Hz,

1H),  $\delta = 6.96$  (d,  $J = 7.4$  Hz, 2H),  $\delta = 6.71$  (d,  $J = 2.8$  Hz, 1H),  $\delta = 6.59$  (s,  $J = 2.8$  Hz, 1H),  $\delta = 4.60$  (s, 1H),  $\delta = 2.34$  (s, 3H),  $\delta = 1.74$  (s, 3H),  $\delta = 1.33$  (s, 1H),  $\delta = 1.26$  (s, 9H),  $\delta = 1.19$  (s, 9H);  $^{13}\text{C}\{^1\text{H}\}$  NMR (100MHz,  $\text{CDCl}_3$ , 25 °C):  $\delta = 184.7$ , 164.6, 161.9, 153.8, 153.2, 138.0, 134.6, 132.0, 130.6, 130.1, 128.8, 128.2, 126.4, 104.9, 46.3, 43.9, 42.3, 36.0, 35.8, 29.3, 29.3, 27.6, 26.9, 21.4 ppm; HRMS (ESI/Q-TOF)  $m/z$ :  $[\text{M} + \text{Na}]^+$  Calcd for  $\text{C}_{28}\text{H}_{34}\text{O}_5\text{Na}$  473.2298; Found 473.2299.

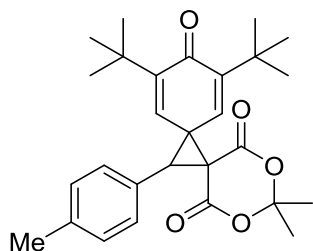

*9,11-Di-tert-butyl-3,3-dimethyl-13-(p-tolyl)-2,4-dioxadispiro[5.0.5<sup>7</sup>.1<sup>6</sup>]trideca-8,11-diene-1,5,10-trione (3da)*. Yellow solid; yield: 39.6 mg (88%); mp 87-89 °C;  $^1\text{H}$  NMR (400 MHz,  $\text{CDCl}_3$ , TMS, 25 °C):  $\delta = 7.16$  (d,  $J = 7.9$  Hz, 2H),  $\delta = 7.04$  (d,  $J = 7.8$  Hz, 2H),  $\delta = 6.69$  (d,  $J = 2.8$  Hz, 1H),  $\delta = 6.59$  (d,  $J = 2.8$  Hz, 1H),  $\delta = 4.59$  (s, 1H),  $\delta = 2.37$  (s, 3H),  $\delta = 1.74$  (s, 3H),  $\delta = 1.32$  (s, 3H),  $\delta = 1.26$  (s, 9H),  $\delta = 1.19$  (s, 9H);  $^{13}\text{C}\{^1\text{H}\}$  NMR (100MHz,  $\text{CDCl}_3$ , 25 °C):  $\delta = 184.7$ , 164.6, 161.9, 153.8, 153.3, 137.7, 134.7, 132.0, 129.3, 129.2, 129.1, 127.6, 127.3, 104.9, 46.4, 43.8, 42.4, 36.0, 35.8, 29.3, 29.3, 28.7, 27.6, 26.9, 21.3 ppm; HRMS (ESI/Q-TOF)  $m/z$ :  $[\text{M} + \text{Na}]^+$  Calcd for  $\text{C}_{28}\text{H}_{34}\text{O}_5\text{Na}$  473.2298; Found 473.2297.

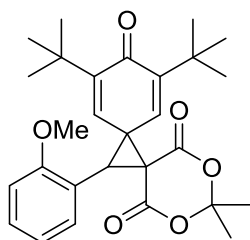

*9,11-Di-tert-butyl-13-(2-methoxyphenyl)-3,3-dimethyl-2,4-dioxadispiro[5.0.5<sup>7</sup>.1<sup>6</sup>]trideca-8,11-diene-1,5,10-trione (3ea)*. Yellow solid; yield: 44.7 mg (96%); mp 106-108 °C;  $^1\text{H}$  NMR (400 MHz,  $\text{CDCl}_3$ , TMS, 25 °C):  $\delta = 7.35$  (m, 1H),  $\delta = 7.04$  (d,  $J = 8.5$  Hz, 1H),  $\delta = 6.96$ -6.89 (m, 2H),  $\delta = 6.76$  (d,  $J = 2.8$  Hz, 1H),  $\delta = 6.66$  (d,  $J = 2.8$  Hz, 1H),  $\delta = 4.31$  (s, 1H),  $\delta = 3.78$  (s, 3H),  $\delta = 1.74$  (s, 3H),  $\delta = 1.33$  (s, 3H),  $\delta = 1.26$  (s, 9H),  $\delta = 1.19$  (s, 9H);  $^{13}\text{C}\{^1\text{H}\}$  NMR (100MHz,  $\text{CDCl}_3$ , 25 °C):  $\delta = 184.9$ , 164.7, 162.2, 158.2, 153.4, 152.8, 135.0, 132.4, 129.5, 129.3, 120.1, 119.7, 110.3, 104.5, 55.6, 45.9, 42.6, 40.6, 35.9, 35.7, 29.3, 27.6, 26.9, 26.8 ppm; HRMS (ESI/Q-TOF)  $m/z$ :  $[\text{M} + \text{Na}]^+$  Calcd for  $\text{C}_{28}\text{H}_{34}\text{O}_6\text{Na}$  489.2248; Found 489.2249.

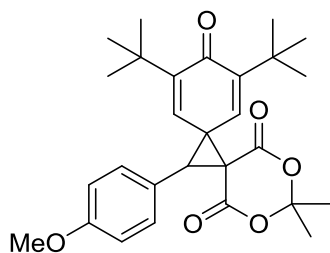

9,11-Di-tert-butyl-13-(4-methoxyphenyl)-3,3-dimethyl-2,4-dioxadispiro[5.0.5<sup>7</sup>.1<sup>6</sup>]trideca-8,11-diene-1,5,10-trione (**3fa**). Yellow solid; yield: 41.5 mg (89%); mp 86-88 °C; <sup>1</sup>H NMR (400 MHz, CDCl<sub>3</sub>, TMS, 25 °C): δ = 7.07 (d, *J* = 8.3 Hz, 2H), δ = 6.88(d, *J* = 8.7 Hz, 2H), δ = 6.70 (d, *J* = 2.8 Hz, 1H), δ = 6.59 (d, *J* = 2.8 Hz, 1H), δ = 4.58 (s, 1H), δ = 3.82 (s, 3H), δ = 1.74 (s, 3H), δ = 1.32 (s, 3H), δ = 1.26 (s, 9H), δ = 1.19 (s, 9H); <sup>13</sup>C{<sup>1</sup>H} NMR (100MHz, CDCl<sub>3</sub>, 25 °C): δ = 184.7, 164.6, 161.9, 159.2, 153.8, 153.3, 134.7, 131.9, 130.5, 128.7, 122.5, 114.1, 113.7, 104.8, 55.2, 46.5, 43.5, 42.4, 36.0, 35.7, 29.3, 29.2, 27.6, 26.9 ppm; HRMS (ESI/Q-TOF) *m/z*: [M + Na]<sup>+</sup> Calcd for C<sub>28</sub>H<sub>34</sub>O<sub>6</sub>Na 489.2248; Found 489.2247.

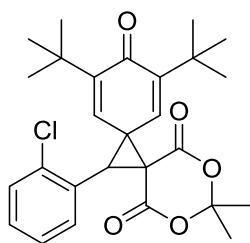

9,11-Di-tert-butyl-13-(2-chlorophenyl)-3,3-dimethyl-2,4-dioxadispiro[5.0.5<sup>7</sup>.1<sup>6</sup>]trideca-8,11-diene-1,5,10-trione (**3ga**). Yellow solid; yield: 41.4 mg (88%); mp 102-104 °C; <sup>1</sup>H NMR (400 MHz, CDCl<sub>3</sub>, TMS, 25 °C): δ = 7.44 (d, *J* = 7.8 Hz, 2H), δ = 7.29 (m, 2H), δ = 7.16 (d, *J* = 7.4 Hz, 1H), δ = 6.74 (s, 1H), δ = 6.65 (s, 1H), δ = 4.40 (s, 1H), δ = 1.75 (s, 3H), δ = 1.34 (d, *J* = 0.8 Hz 3H), δ = 1.26 (d, *J* = 1.8 Hz 9H), δ = 1.20 (d, *J* = 1.8 Hz 9H); <sup>13</sup>C{<sup>1</sup>H} NMR (100MHz, CDCl<sub>3</sub>, 25 °C): δ = 184.6, 164.2, 162.1, 153.9, 153.3, 135.6, 134.4, 131.4, 130.0, 129.6, 126.5, 104.9, 45.9, 42.8, 42.6, 36.1, 35.8, 29.3, 28.8, 27.5, 27.0 ppm; HRMS (ESI/Q-TOF) *m/z*: [M + Na]<sup>+</sup> Calcd for C<sub>27</sub>H<sub>31</sub>ClO<sub>5</sub>Na 493.1752; Found 493.1753.

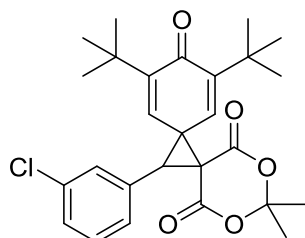

9,11-Di-tert-butyl-13-(3-chlorophenyl)-3,3-dimethyl-2,4-dioxadispiro[5.0.5<sup>7</sup>.1<sup>6</sup>]trideca-8,11-diene-1,5,10-trione (**3ha**). Yellow solid; yield: 42.3 mg (90%); mp 94-96 °C; <sup>1</sup>H NMR (400 MHz, CDCl<sub>3</sub>, TMS, 25 °C): δ = 7.44 (d, *J* = 7.8 Hz, 2H), δ = 7.29 (m, 2H), δ = 7.32-7.27 (m, 2H), δ = 7.16 (s, 1H), δ = 7.08-7.06 (m, 1H), δ = 6.63 (d, *J* = 2.8 Hz, 1H), δ = 6.56 (d, *J* = 2.8 Hz, 1H), δ = 4.56 (s, 1H), δ = 1.75 (s, 3H), δ = 1.33 (s, 3H), δ

= 1.26 (s, 9H),  $\delta$  = 1.20 (s, 9H) ;  $^{13}\text{C}\{^1\text{H}\}$  NMR (100MHz,  $\text{CDCl}_3$ , 25 °C):  $\delta$  = 184.5, 164.3, 161.8, 154.1, 153.8, 134.2, 134.1, 132.7, 131.2, 129.6, 129.5, 128.3, 127.7, 105.1, 45.9, 42.9, 42.2, 36.1, 35.8, 29.3, 29.3, 27.6, 26.9 ppm; HRMS (ESI/Q-TOF) m/z:  $[\text{M} + \text{Na}]^+$  Calcd for  $\text{C}_{27}\text{H}_{31}\text{ClO}_5\text{Na}$  493.1752; Found 493.1754.

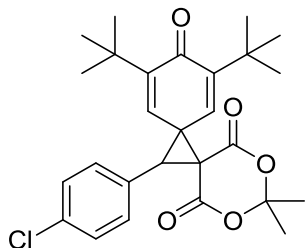

*9,11-Di-tert-butyl-13-(4-chlorophenyl)-3,3-dimethyl-2,4-dioxadispiro[5.0.5<sup>7</sup>.1<sup>6</sup>]trideca-8,11-diene-1,5,10-trione (3ia)*. Yellow solid; yield: 44.2 mg (94%); mp 86-89 °C;  $^1\text{H}$  NMR (400 MHz,  $\text{CDCl}_3$ , TMS, 25 °C):  $\delta$  = 7.44 (d,  $J$  = 7.8 Hz, 2H),  $\delta$  = 7.29 (m, 2H),  $\delta$  = 7.32-7.27 (m, 2H),  $\delta$  = 7.16 (s, 1H),  $\delta$  = 7.08-7.06 (m, 1H),  $\delta$  = 6.63 (d,  $J$  = 2.8 Hz, 1H),  $\delta$  = 6.56 (d,  $J$  = 2.8 Hz, 1H),  $\delta$  = 4.56 (s, 1H),  $\delta$  = 1.75 (s, 3H),  $\delta$  = 1.33 (s, 3H),  $\delta$  = 1.26 (s, 9H),  $\delta$  = 1.20 (s, 9H) ;  $^{13}\text{C}\{^1\text{H}\}$  NMR (100MHz,  $\text{CDCl}_3$ , 25 °C):  $\delta$  = 184.5, 164.3, 161.8, 154.1, 153.8, 134.2, 134.1, 132.7, 131.2, 129.6, 129.5, 128.3, 127.7, 105.1, 45.9, 42.9, 42.2, 36.1, 35.8, 29.3, 29.3, 27.6, 26.9 ppm; HRMS (ESI/Q-TOF) m/z:  $[\text{M} + \text{Na}]^+$  Calcd for  $\text{C}_{27}\text{H}_{31}\text{ClO}_5\text{Na}$  493.1752; Found 493.1753.

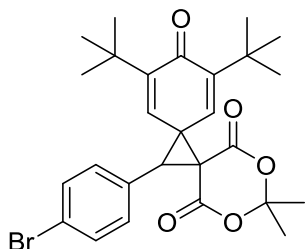

*13-(4-Bromophenyl)-9,11-di-tert-butyl-3,3-dimethyl-2,4-dioxadispiro[5.0.5<sup>7</sup>.1<sup>6</sup>]trideca-8,11-diene-1,5,10-trione (3ja)*. Yellow solid; yield: 49.9 mg (97%); mp 98-101 °C;  $^1\text{H}$  NMR (400 MHz,  $\text{CDCl}_3$ , TMS, 25 °C):  $\delta$  = 7.48 (d,  $J$  = 8.4 Hz, 2H),  $\delta$  = 7.04 (d,  $J$  = 7.8 Hz, 2H),  $\delta$  = 6.60 (d,  $J$  = 2.9 Hz, 1H),  $\delta$  = 6.56 (d,  $J$  = 2.9 Hz, 1H),  $\delta$  = 4.52 (s, 1H),  $\delta$  = 1.74 (s, 3H),  $\delta$  = 1.32 (s, 3H),  $\delta$  = 1.25 (s, 9H),  $\delta$  = 1.18 (s, 9H) ;  $^{13}\text{C}\{^1\text{H}\}$  NMR (100MHz,  $\text{CDCl}_3$ , 25 °C):  $\delta$  = 184.5, 164.3, 161.8, 154.1, 153.8, 134.2, 134.1, 132.7, 131.2, 129.6, 129.5, 128.3, 127.7, 105.1, 45.9, 42.9, 42.2, 36.1, 35.8, 29.3, 29.3, 27.6, 26.9 ppm; HRMS (ESI/Q-TOF) m/z:  $[\text{M} + \text{Na}]^+$  Calcd for  $\text{C}_{27}\text{H}_{31}\text{BrO}_5\text{Na}$  537.1247; Found 537.1248.



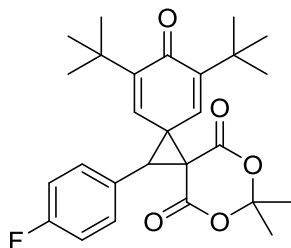

9,11-Di-tert-butyl-13-(4-fluorophenyl)-3,3-dimethyl-2,4-dioxadispiro[5.0.5<sup>7</sup>.1<sup>6</sup>]trideca-8,11-diene-1,5,10-trione (**3ka**). Yellow solid; yield: 41.8 mg (92%); mp 89-93 °C; <sup>1</sup>H NMR (400 MHz, CDCl<sub>3</sub>, TMS, 25 °C): δ = 7.15-7.12 (m, 2H), δ = 7.07-7.03 (m, 2H), δ = 6.62 (d, *J* = 2.9 Hz, 1H), δ = 6.58 (d, *J* = 2.8 Hz, 1H), δ = 4.57 (s, 1H), δ = 1.75 (s, 3H), δ = 1.33 (s, 3H), δ = 1.26 (s, 9H), δ = 1.18 (s, 9H); <sup>13</sup>C{<sup>1</sup>H} NMR (100MHz, CDCl<sub>3</sub>, 25 °C): δ = 184.6, 164.4, 161.9, 154.0, 153.7, 134.3, 131.4, 131.1, 131.0, 126.4, 126.4, 115.5, 115.3, 105.0, 46.3, 43.0, 42.2, 36.1, 35.8, 29.3, 29.3, 27.6, 26.9 ppm; HRMS (ESI/Q-TOF) *m/z*: [M + Na]<sup>+</sup> Calcd for C<sub>27</sub>H<sub>31</sub>FO<sub>5</sub>Na 477.2048; Found 477.2047.

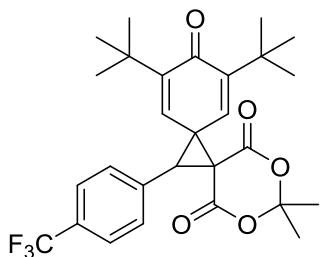

9,11-Di-tert-butyl-13-(4-trifluoromethylphenyl)-3,3-dimethyl-2,4-dioxadispiro[5.0.5<sup>7</sup>.1<sup>6</sup>]trideca-8,11-diene-1,5,10-trione (**3la**). Yellow solid; yield: 32.8 mg (65%); mp 105-107 °C; <sup>1</sup>H NMR (400 MHz, CDCl<sub>3</sub>, TMS, 25 °C): δ = 7.62 (d, *J* = 8.0 Hz, 2H), δ = 7.30-7.27 (m, 2H), δ = 6.59 (s, 2H), δ = 4.60 (s, 1H), δ = 1.76 (s, 3H), δ = 1.33 (s, 3H), δ = 1.27 (s, 9H), δ = 1.19 (s, 9H); <sup>13</sup>C{<sup>1</sup>H} NMR (100MHz, CDCl<sub>3</sub>, 25 °C): δ = 184.5, 164.2, 161.9, 154.3, 154.1, 134.8, 134.0, 130.9, 129.8, 125.3, 105.2, 46.0, 43.0, 42.2, 36.1, 35.8, 29.3, 28.6, 27.6, 27.0, 26.9 ppm; HRMS (ESI/Q-TOF) *m/z*: [M + Na]<sup>+</sup> Calcd for C<sub>28</sub>H<sub>31</sub>F<sub>3</sub>O<sub>5</sub>Na 527.2016; Found 527.2015.

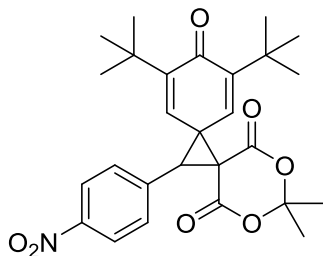

9,11-Di-tert-butyl-13-(4-nitrophenyl)-3,3-dimethyl-2,4-dioxadispiro[5.0.5<sup>7</sup>.1<sup>6</sup>]trideca-8,11-diene-1,5,10-trione (**3ma**). Yellow solid; yield: 39.9 mg (83%); mp 106-109 °C; <sup>1</sup>H NMR (400 MHz, CDCl<sub>3</sub>, TMS, 25 °C): δ = 8.24 (d, *J* = 8.7 Hz, 2H), δ = 7.36 (d, *J* = 8.1 Hz, 2H), δ = 6.58 (d, *J* = 2.9 Hz, 1H), δ = 6.53 (d, *J* = 2.8 Hz, 1H), δ = 4.61 (s, 1H), δ = 1.77 (s, 3H), δ = 1.34 (s, 3H), δ = 1.27 (s, 9H), δ = 1.19 (s, 9H); <sup>13</sup>C{<sup>1</sup>H} NMR

(100MHz, CDCl<sub>3</sub>, 25 °C):  $\delta$  = 184.3, 164.0, 162.0, 154.5, 154.5, 147.6, 138.2, 133.6, 130.5, 130.3, 128.7, 123.8, 123.6, 105.4, 45.8, 42.5, 42.2, 36.2, 35.9, 29.3, 28.8, 27.5, 27.0, ppm; HRMS (ESI/Q-TOF) m/z: [M + Na]<sup>+</sup> Calcd for C<sub>27</sub>H<sub>31</sub>NO<sub>7</sub>Na 504.1993; Found 504.1992..

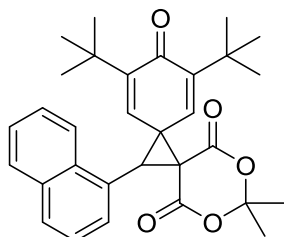

*9,11-Di-tert-butyl-3,3-dimethyl-13-(naphthalen-1-yl)-2,4-dioxadispiro[5.0.5<sup>7</sup>.1<sup>6</sup>]trideca-8,11-diene-1,5,10-trione (3na)*. Yellow solid; yield: 44.7 mg (92%); mp 108-110 °C; <sup>1</sup>H NMR (400 MHz, CDCl<sub>3</sub>, TMS, 25 °C):  $\delta$  = 7.91-7.86 (m, 2H),  $\delta$  = 7.68-7.64 (m, 1H),  $\delta$  = 7.53-7.49 (m, 2H),  $\delta$  = 7.44 (m, 1H),  $\delta$  = 7.30 (d, *J* = 7.2 Hz, 1H),  $\delta$  = 6.83 (d, *J* = 2.8 Hz, 1H),  $\delta$  = 6.72 (d, *J* = 2.9 Hz, 1H),  $\delta$  = 4.81 (s, 1H),  $\delta$  = 1.75 (s, 3H),  $\delta$  = 1.36 (s, 3H),  $\delta$  = 1.30 (s, 9H),  $\delta$  = 1.19 (s, 9H); <sup>13</sup>C{<sup>1</sup>H} NMR (100MHz, CDCl<sub>3</sub>, 25 °C):  $\delta$  = 186.1, 166.1, 163.0, 155.6, 154.6, 136.1, 134.9, 133.9, 133.8, 130.5, 130.4, 128.8, 128.3, 128.3, 127.5, 126.2, 124.3, 106.4, 47.4, 44.4, 43.7, 37.4, 37.3, 30.7, 30.6, 29.0, 28.3 ppm; HRMS (ESI/Q-TOF) m/z: [M + Na]<sup>+</sup> Calcd for C<sub>31</sub>H<sub>34</sub>O<sub>5</sub>Na 509.2298; Found 509.2297.

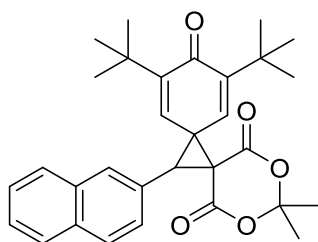

*9,11-Di-tert-butyl-3,3-dimethyl-13-(naphthalen-2-yl)-2,4-dioxadispiro[5.0.5<sup>7</sup>.1<sup>6</sup>]trideca-8,11-diene-1,5,10-trione (3oa)*. Yellow solid; yield: 45.7 mg (94%); mp 86-88 °C; <sup>1</sup>H NMR (400 MHz, CDCl<sub>3</sub>, TMS, 25 °C):  $\delta$  = 7.87-7.83 (m, 2H),  $\delta$  = 7.77-7.75 (m, 1H),  $\delta$  = 7.61 (s, 1H),  $\delta$  = 7.51-7.48 (m, 2H),  $\delta$  = 7.28 (dd, *J* = 8.6, 1.4 Hz, 1H),  $\delta$  = 6.78 (d, *J* = 2.8 Hz, 1H),  $\delta$  = 6.65 (d, *J* = 2.8 Hz, 1H),  $\delta$  = 4.76 (s, 1H),  $\delta$  = 1.76 (s, 3H),  $\delta$  = 1.35 (s, 3H),  $\delta$  = 1.29 (s, 9H),  $\delta$  = 1.19 (s, 9H); <sup>13</sup>C{<sup>1</sup>H} NMR (100MHz, CDCl<sub>3</sub>, 25 °C):  $\delta$  = 184.8, 164.6, 161.9, 154.0, 153.5, 134.5, 133.1, 132.9, 131.9, 128.3, 128.3, 128.1, 127.9, 127.7, 127.2, 126.5, 126.4, 105.0, 46.4, 44.0, 42.3, 36.1, 35.8, 29.3, 27.6, 26.9 ppm; HRMS (ESI/Q-TOF) m/z: [M + Na]<sup>+</sup> Calcd for C<sub>31</sub>H<sub>34</sub>O<sub>5</sub>Na 509.2298; Found 509.2299.

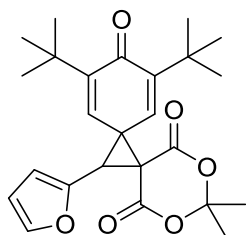

9,11-Di-tert-butyl-13-(furan-2-yl)-3,3-dimethyl-2,4-dioxadispiro[5.0.5<sup>7</sup>.1<sup>6</sup>]trideca-8,11-diene-1,5,10-trione (**3pa**). Yellow solid; yield: 39.6 mg (93%); mp 86-89 °C; <sup>1</sup>H NMR (400 MHz, CDCl<sub>3</sub>, TMS, 25 °C): δ = 7.44 (t, *J* = 1.6 Hz, 1H), δ = 6.97(d, *J* = 2.9 Hz, 1H), δ = 6.54 (d, *J* = 2.8 Hz, 1H), δ = 6.42-6.41 (m, 1H), δ = 6.30 (d, *J* = 3.1 Hz, 1H), δ = 4.38 (s, 1H), δ = 1.73 (s, 3H), δ = 1.33 (s, 3H), δ = 1.24 (s, 9H), δ = 1.23 (s, 9H); <sup>13</sup>C{<sup>1</sup>H} NMR (100MHz, CDCl<sub>3</sub>, 25 °C): δ = 184.6, 163.9, 161.6, 154.1, 153.7, 144.7, 142.8, 133.7, 131.2, 110.7, 110.2, 105.0, 45.1, 41.9, 36.6, 36.0, 35.8, 29.3, 29.2, 27.6, 26.9 ppm; HRMS (ESI/Q-TOF) m/z: [M + Na]<sup>+</sup> Calcd for C<sub>25</sub>H<sub>30</sub>O<sub>6</sub>Na 449.1935; Found 449.1936.

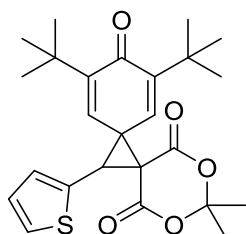

9,11-Di-tert-butyl-3,3-dimethyl-13-(thiophen-2-yl)-2,4-dioxadispiro[5.0.5<sup>7</sup>.1<sup>6</sup>]trideca-8,11-diene-1,5,10-trione (**3qa**). Yellow solid; yield: 41.5 mg (94%); mp 77-79 °C; <sup>1</sup>H NMR (400 MHz, CDCl<sub>3</sub>, TMS, 25 °C): δ = 7.33 (d, *J* = 5.0 Hz, 1H), δ = 7.02-7.00 (m, 1H), δ = 6.96-6.95 (m, 2H), δ = 6.56 (d, *J* = 2.8 Hz, 1H), δ = 4.60 (s, 1H), δ = 1.74 (s, 3H), δ = 1.33 (s, 3H), δ = 1.25 (s, 9H), δ = 1.23 (s, 9H); <sup>13</sup>C{<sup>1</sup>H} NMR (100MHz, CDCl<sub>3</sub>, 25 °C): δ = 184.6, 164.0, 161.6, 154.0, 153.7, 133.9, 132.6, 131.1, 128.5, 126.7, 126.2, 105.0, 46.3, 42.9, 39.0, 36.1, 35.8, 29.3, 29.2, 27.6, 26.9 ppm; HRMS (ESI/Q-TOF) m/z: [M + Na]<sup>+</sup> Calcd for C<sub>25</sub>H<sub>30</sub>O<sub>5</sub>SNa 465.1706; Found 465.1705.

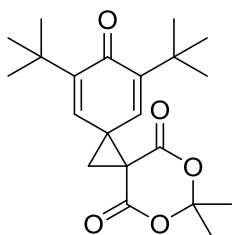

9,11-Di-tert-butyl-3,3-dimethyl-13-(thiophen-2-yl)-2,4-dioxadispiro[5.0.5<sup>7</sup>.1<sup>6</sup>]trideca-8,11-diene-1,5,10-trione (**3ra**). Yellow solid; yield: 22.0 mg (61%); mp 106-109 °C; <sup>1</sup>H NMR (400 MHz, CDCl<sub>3</sub>, TMS, 25 °C): δ = 6.50 (s, 2H), δ = 2.84 (s, 2H), δ = 1.75 (s, 3H), δ = 1.32 (s, 3H), δ = 1.22 (s, 18H); <sup>13</sup>C{<sup>1</sup>H} NMR (100MHz, CDCl<sub>3</sub>, 25 °C): δ = 184.5, 164.1, 154.0, 133.7, 105.3, 43.9, 39.5, 35.7, 29.2, 27.6, 26.9, 26.7 ppm; HRMS (ESI/Q-TOF) m/z: [M + Na]<sup>+</sup> Calcd for C<sub>21</sub>H<sub>28</sub>O<sub>4</sub>Na 361.2010; Found 361.2011.

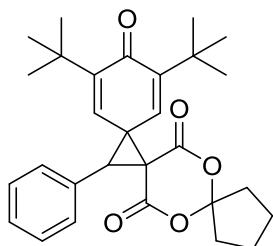

*11,13-Di-tert-butyl-15-phenyl-6,17-dioxatrispiro[4.2.0.5<sup>9</sup>.1<sup>8</sup>.2<sup>5</sup>]heptadeca-10,13-diene-7,12,16-trione (3ab)*. Yellow solid; yield: 43.0 mg (93%); mp 81-84 °C; <sup>1</sup>H NMR (400 MHz, CDCl<sub>3</sub>, TMS, 25 °C): δ = 7.36-7.34 (m, 3H), δ = 7.17-7.15 (m, 2H), δ = 6.63 (d, *J* = 2.9 Hz, 1H), δ = 6.54 (d, *J* = 2.9 Hz, 1H), δ = 4.60 (s, 1H), δ = 2.22-2.19 (m, 2H), δ = 1.81-1.70 (m, 4H), δ = 1.57-1.56 (m, 2H), δ = 1.27 (s, 9H), δ = 1.19 (s, 9H); <sup>13</sup>C{<sup>1</sup>H} NMR (100MHz, CDCl<sub>3</sub>, 25 °C): δ = 184.7, 165.1, 162.4, 153.8, 153.3, 134.7, 131.9, 130.6, 129.5, 128.3, 128.0, 114.1, 46.2, 43.6, 42.6, 38.8, 37.9, 36.0, 35.7, 29.3, 29.3, 23.9, 22.3 ppm; HRMS (ESI/Q-TOF) *m/z*: [M + Na]<sup>+</sup> Calcd for C<sub>30</sub>H<sub>36</sub>O<sub>5</sub>Na 485.2298; Found 485.2297.

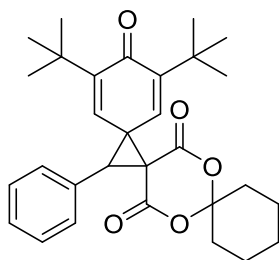

*2,4-Di-tert-butyl-18-phenyl-9,16-dioxatrispiro[5.0.2.5<sup>10</sup>.2<sup>7</sup>.1<sup>6</sup>]octadeca-1,4-diene-3,8,17-trione (3ac)*. Yellow solid; yield: 45.2 mg (95%); mp 110-113 °C; <sup>1</sup>H NMR (400 MHz, CDCl<sub>3</sub>, TMS, 25 °C): δ = 7.34 (d, *J* = 7.3 Hz, 3H), δ = 7.17-7.15 (m, 2H), δ = 6.66 (d, *J* = 2.9 Hz, 1H), δ = 6.57 (d, *J* = 2.8 Hz, 1H), δ = 4.62 (s, 1H), δ = 1.98-1.92 (m, 2H), δ = 1.75-1.74 (d, *J* = 5.5 Hz, 2H), δ = 1.43 (s, 6H), δ = 1.26 (s, 9H), δ = 1.18 (s, 9H); <sup>13</sup>C{<sup>1</sup>H} NMR (100MHz, CDCl<sub>3</sub>, 25 °C): δ = 184.8, 164.6, 161.9, 153.9, 153.4, 134.7, 131.9, 130.8, 129.4, 128.3, 127.9, 105.8, 46.2, 43.8, 42.7, 36.5, 36.0, 35.9, 35.7, 29.3, 29.3, 23.9, 22.6, 21.6 ppm; HRMS (ESI/Q-TOF) *m/z*: [M + Na]<sup>+</sup> Calcd for C<sub>29</sub>H<sub>34</sub>O<sub>5</sub>Na 499.2455; Found 499.2454.

## General Procedure for the Synthesis of Spirobutyrolactones **4**

The solution of 0.1 mmol dispirocyclopropane **3** in 1 mL of DMSO (0.1 *M*) was stirred at 90 °C (silicon oil bath) for 4 h. The reaction process was monitored by TLC analysis. The reaction mixture was quenched with distilled water (5 mL). The mixture was then extracted with ethyl acetate (3 × 10 mL). The combined organic phase was washed with brine (3 × 10 mL), dried using anhydrous Na<sub>2</sub>SO<sub>4</sub>, and then filtered. The solvent was removed under vacuum, and the crude was purified by flash column chromatography (silica gel, petroleum ether/EtOAc = 20/1) to give the desired product **4**.

## Spectroscopic Data of Spirobutyrolactones 4

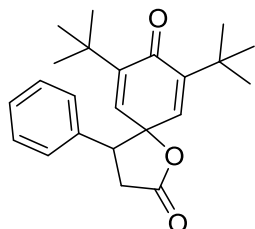

7,9-Di-tert-butyl-4-phenyl-1-oxaspiro[4.5]deca-6,9-diene-2,8-dione (**4a**). White solid; yield: 28.5 mg (81%); mp 152.5-153.2 °C; IR (neat): 2958, 1790, 1667, 1646, 1482, 1458, 1193, 881, 693 $\text{cm}^{-1}$ ;  $^1\text{H}$  NMR (400 MHz,  $\text{CDCl}_3$ , TMS, 25 °C):  $\delta$  = 7.27-7.24 (m, 3H),  $\delta$  = 7.03-7.00 (m, 2H),  $\delta$  = 6.66 (d,  $J$  = 3.1 Hz, 1H),  $\delta$  = 6.30 (d,  $J$  = 3.2 Hz, 1H),  $\delta$  = 3.83 (dd,  $J$  = 12.4, 8.4 Hz, 1H),  $\delta$  = 3.27 (dd,  $J$  = 17.4, 12.4 Hz, 1H),  $\delta$  = 2.99 (dd,  $J$  = 17.4, 8.3 Hz, 1H),  $\delta$  = 1.25 (s, 9H),  $\delta$  = 0.91 (s, 9H);  $^{13}\text{C}\{^1\text{H}\}$  NMR (100 MHz,  $\text{CDCl}_3$ , 25 °C):  $\delta$  = 184.9, 174.7, 149.2, 149.0, 137.1, 134.4, 133.6, 128.6, 128.4, 127.5, 83.5, 50.9, 35.0, 34.7, 32.7, 29.3, 28.7 ppm; HRMS (ESI/Q-TOF)  $m/z$ :  $[\text{M} + \text{Na}]^+$  Calcd for  $\text{C}_{23}\text{H}_{28}\text{O}_3\text{Na}$  375.1931; Found 375.1935.

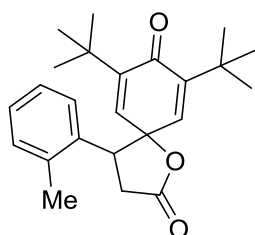

7,9-Di-tert-butyl-4-(*o*-tolyl)-1-oxaspiro[4.5]deca-6,9-diene-2,8-dione (**4b**). Red solid; yield: 33.7 mg (92%); mp 118.9-119.5 °C; IR (neat): 2955, 1765, 1670, 1650, 1483, 1459, 1366, 954 $\text{cm}^{-1}$ ;  $^1\text{H}$  NMR (400 MHz,  $\text{CDCl}_3$ , TMS, 25 °C):  $\delta$  = 7.23-7.10 (m, 4H),  $\delta$  = 6.66 (d,  $J$  = 3.2 Hz, 1H),  $\delta$  = 6.16 (d,  $J$  = 3.2 Hz, 1H),  $\delta$  = 4.07 (dd,  $J$  = 8.8, 7.6 Hz, 1H),  $\delta$  = 3.17 (dd,  $J$  = 18.0, 9.0 Hz, 1H),  $\delta$  = 3.07 (dd,  $J$  = 18.0, 7.5 Hz, 1H),  $\delta$  = 2.15 (s, 3H),  $\delta$  = 1.23 (s, 9H),  $\delta$  = 0.95 (s, 9H);  $^{13}\text{C}\{^1\text{H}\}$  NMR (100 MHz,  $\text{CDCl}_3$ , 25 °C):  $\delta$  = 185.1, 175.4, 147.7, 147.5, 137.5, 136.4, 136.2, 134.6, 131.1, 128.0, 126.5, 126.4, 83.0, 45.6, 35.1, 34.9, 34.8, 29.1, 28.8, 20.3 ppm; HRMS (ESI/Q-TOF)  $m/z$ :  $[\text{M} + \text{H}]^+$  Calcd for  $\text{C}_{24}\text{H}_{31}\text{O}_3$  367.2268; Found 367.2266.

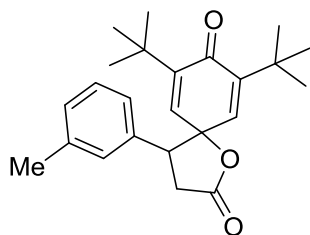

7,9-Di-*tert*-butyl-4-(*m*-tolyl)-1-oxaspiro[4.5]deca-6,9-diene-2,8-dione (**4c**). Yellow solid; yield: 26.7 mg (73%); mp 110.0-110.7 °C; IR (neat): 2917, 1778, 1670, 1647, 1659, 1484, 1365, 1205, 981cm<sup>-1</sup>; <sup>1</sup>H NMR (400 MHz, CDCl<sub>3</sub>, TMS, 25 °C): δ = 7.27-7.22 (m, 1H), δ = 7.00 (d, *J* = 6.6 Hz, 1H), δ = 6.89 (t, *J* = 7.4 Hz, 1H), δ = 6.82 (d, *J* = 8.2 Hz, 1H), δ = 6.63 (d, *J* = 3.0 Hz, 1H), δ = 6.28 (d, *J* = 3.0 Hz, 1H), δ = 4.13 (t, *J* = 9.0 Hz, 1H), δ = 3.75 (s, 3H), δ = 3.24 (dd, *J* = 17.8, 8.5 Hz, 1H), δ = 3.02 (dd, *J* = 17.8, 9.5 Hz, 1H), δ = 1.22 (s, 9H), δ = 0.94 (s, 9H); <sup>13</sup>C{<sup>1</sup>H} NMR (100 MHz, CDCl<sub>3</sub>, 25 °C): δ = 185.0, 174.8, 149.1, 148.8, 138.2, 137.2, 134.5, 133.5, 129.0, 128.5, 128.4, 124.2, 83.6, 50.7, 35.0, 34.7, 32.5, 29.3, 28.7, 21.3ppm; HRMS (ESI/Q-TOF) m/z: [M + H]<sup>+</sup> Calcd for C<sub>24</sub>H<sub>31</sub>O<sub>3</sub> 367.2268; Found 367.2269.

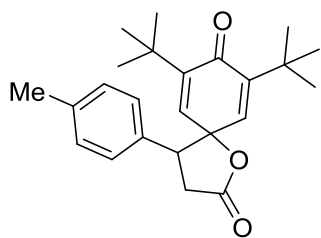

7,9-Di-*tert*-butyl-4-(*p*-tolyl)-1-oxaspiro[4.5]deca-6,9-diene-2,8-dione (**4d**). Yellow solid; yield: 25.6 mg (70%); mp 160.3-160.8 °C; IR (neat): 2920, 1780, 1668, 1644, 1518, 1460, 1364, 1188, 980, 816cm<sup>-1</sup>; <sup>1</sup>H NMR (400 MHz, CDCl<sub>3</sub>, TMS, 25 °C): δ = 7.06 (d, *J* = 7.9 Hz, 2H), δ = 6.91(d, *J* = 8.0 Hz, 2H), δ = 6.63 (d, *J* = 3.1 Hz, 1H), δ = 6.26 (d, *J* = 3.1 Hz, 1H), δ = 3.77 (dd, *J* = 12.3, 8.4 Hz, 1H), δ = 3.22(dd, *J* = 17.4, 12.4 Hz, 1H), δ = 2.97 (dd, *J* = 17.4, 8.3 Hz, 1H), δ = 2.27 (s, 3H), δ = 1.25 (s, 9H), δ = 0.92 (s, 9H); <sup>13</sup>C{<sup>1</sup>H} NMR (100 MHz, CDCl<sub>3</sub>, 25 °C): δ = 184.9, 174.8, 149.1, 148.8, 138.3, 137.2, 134.5, 130.5, 129.2, 127.3, 83.7, 50.5, 35.0, 34.7, 32.7, 29.3, 28.7, 21.0ppm; HRMS (ESI/Q-TOF) m/z: [M + H]<sup>+</sup> Calcd for C<sub>24</sub>H<sub>31</sub>O<sub>3</sub> 367.2268; Found 367.2270.

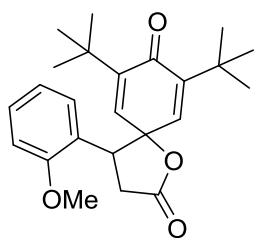

7,9-Di-*tert*-butyl-4-(2-methoxyphenyl)-1-oxaspiro[4.5]deca-6,9-diene-2,8-dione (**4e**). Yellow solid; yield: 35.1 mg (92%); mp 120.7-121.3 °C; IR (neat): 2955, 1777, 1699, 1643, 1604, 1497, 1461, 1365, 978, 749cm<sup>-1</sup>; <sup>1</sup>H NMR (400 MHz, CDCl<sub>3</sub>, TMS, 25 °C): δ = 7.19-7.13 (m, 1H), δ = 7.05 (d, *J* = 7.4 Hz, 1H), δ = 6.82 (d, *J* = 9.7 Hz, 2H), δ = 6.62 (d, *J* = 3.0 Hz, 1H), δ = 6.24 (d, *J* = 3.0 Hz, 1H), δ = 3.76(dd, *J* = 12.2, 8.4 Hz, 1H), δ = 3.23 (dd, *J* = 17.4, 12.4 Hz, 1H), δ = 2.97 (dd, *J* = 17.4, 8.3 Hz, 1H), δ = 1.26 (s, 9H), δ = 0.91 (s, 9H); <sup>13</sup>C{<sup>1</sup>H} NMR (100 MHz, CDCl<sub>3</sub>, 25 °C): δ = 185.5, 175.8, 157.1, 147.6, 147.1, 138.2, 136.0, 129.4, 129.0, 123.9, 120.5, 110.8, 83.2, 55.1, 45.4, 34.8, 34.6, 33.6, 29.3, 28.9 ppm; HRMS (ESI/Q-TOF) m/z: [M + H]<sup>+</sup> Calcd for C<sub>24</sub>H<sub>31</sub>O<sub>4</sub> 383.2217; Found 383.2215.

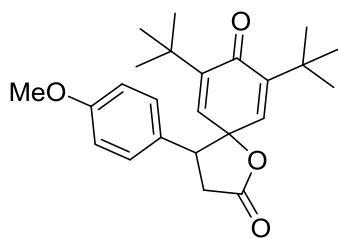

*7,9-Di-tert-butyl-4-(4-methoxyphenyl)-1-oxaspiro[4.5]deca-6,9-diene-2,8-dione (4f)*. Yellow solid; yield: 28.3 mg (74%); mp 150.1-150.7 °C; IR (neat): 2959, 1779, 1667, 1640, 1515, 1453, 1250, 981, 829 $\text{cm}^{-1}$ ;  $^1\text{H}$  NMR (400 MHz,  $\text{CDCl}_3$ , TMS, 25 °C):  $\delta$  = 6.93 (d,  $J$  = 8.7 Hz, 2H),  $\delta$  = 6.78 (d,  $J$  = 8.7 Hz, 2H),  $\delta$  = 6.61 (d,  $J$  = 3.1 Hz, 1H),  $\delta$  = 6.25 (d,  $J$  = 3.2 Hz, 1H),  $\delta$  = 3.77-3.72 (m, 4H),  $\delta$  = 3.17 (dd,  $J$  = 17.4, 12.3 Hz, 1H),  $\delta$  = 2.98 (dd,  $J$  = 17.4, 8.4 Hz, 1H),  $\delta$  = 1.25 (s, 9H),  $\delta$  = 0.94 (s, 9H);  $^{13}\text{C}\{^1\text{H}\}$  NMR (100 MHz,  $\text{CDCl}_3$ , 25 °C):  $\delta$  = 184.8, 174.2, 149.4, 149.3, 136.9, 134.3, 134.0, 132.2, 128.8, 128.7, 83.3, 50.3, 35.1, 34.8, 32.7, 29.3, 28.8 ppm; HRMS (ESI/Q-TOF)  $m/z$ :  $[\text{M} + \text{H}]^+$  Calcd for  $\text{C}_{24}\text{H}_{31}\text{O}_4$  383.2217; Found 383.2214.

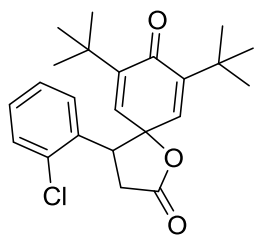

*7,9-Di-tert-butyl-4-(2-chlorophenyl)-1-oxaspiro[4.5]deca-6,9-diene-2,8-dione (4g)*. Yellow solid; yield: 32.4 mg (84%); mp 118.3-119.0 °C; IR (neat): 2965, 1773, 1671, 1652, 1596, 1481, 1363, 948, 755 $\text{cm}^{-1}$ ;  $^1\text{H}$  NMR (400 MHz,  $\text{CDCl}_3$ , TMS, 25 °C):  $\delta$  = 7.34-7.20 (m, 4H),  $\delta$  = 6.66 (d,  $J$  = 3.2 Hz, 1H),  $\delta$  = 6.18 (d,  $J$  = 3.2 Hz, 1H),  $\delta$  = 4.45 (t,  $J$  = 8.8 Hz, 1H),  $\delta$  = 3.19-3.06 (m, 2H),  $\delta$  = 1.22 (s, 9H),  $\delta$  = 0.98 (s, 9H);  $^{13}\text{C}\{^1\text{H}\}$  NMR (100 MHz,  $\text{CDCl}_3$ , 25 °C):  $\delta$  = 184.9, 174.7, 148.6, 147.7, 137.2, 134.8, 134.7, 133.4, 130.2, 129.4, 128.3, 127.0, 83.0, 46.2, 34.9, 34.8, 34.3, 29.0, 28.8 ppm; HRMS (ESI/Q-TOF)  $m/z$ :  $[\text{M} + \text{H}]^+$  Calcd for  $\text{C}_{23}\text{H}_{28}\text{ClO}_3$  387.1721; Found 387.1723.

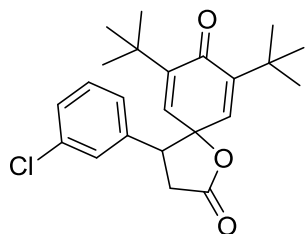

*7,9-Di-tert-butyl-4-(3-chlorophenyl)-1-oxaspiro[4.5]deca-6,9-diene-2,8-dione (4h)*. Yellow solid; yield: 37.1 mg (96%); mp 147.3-147.9 °C; IR (neat): 2959, 1778, 1669, 1646, 1599, 1481, 1394, 981, 788 $\text{cm}^{-1}$ ;  $^1\text{H}$  NMR (400 MHz,  $\text{CDCl}_3$ , TMS, 25 °C):  $\delta$  = 7.26-7.18 (m, 2H),  $\delta$  = 7.02 (d,  $J$  = 1.8 Hz, 1H),  $\delta$  = 6.91 (d,  $J$  = 7.4 Hz, 1H),  $\delta$  = 6.62 (d,  $J$  = 3.2 Hz, 1H),  $\delta$  = 6.27 (d,  $J$  = 3.2 Hz, 1H),  $\delta$  = 3.78 (dd,  $J$  = 12.5, 8.3 Hz, 1H),  $\delta$  = 3.20 (dd,  $J$  = 17.4, 12.5 Hz, 1H),  $\delta$  = 2.99 (dd,  $J$  = 17.4, 8.3 Hz, 1H),  $\delta$  = 1.26 (s, 9H),  $\delta$  = 0.95



(s, 9H);  $^{13}\text{C}\{^1\text{H}\}$  NMR (100 MHz,  $\text{CDCl}_3$ , 25 °C):  $\delta$  = 184.8, 174.1, 149.6, 149.4, 136.8, 135.6, 134.6, 133.9, 129.8, 128.5, 127.9, 125.7, 83.3, 50.5, 35.1, 34.8, 32.4, 29.3, 28.8 ppm; HRMS (ESI/Q-TOF)  $m/z$ :  $[\text{M} + \text{H}]^+$  Calcd for  $\text{C}_{23}\text{H}_{28}\text{ClO}_3$  387.1721; Found 387.1723.

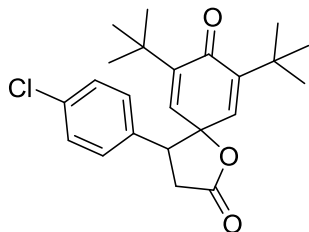

*7,9-Di-tert-butyl-4-(4-chlorophenyl)-1-oxaspiro[4.5]deca-6,9-diene-2,8-dione* (**4i**). Yellow solid; yield: 34.0 mg (88%); mp 219.3-220.1 °C; IR (neat): 2917, 1793, 1668, 1645, 1526, 1494, 1466, 1366, 1192, 980, 750 $\text{cm}^{-1}$ ;  $^1\text{H}$  NMR (400 MHz,  $\text{CDCl}_3$ , TMS, 25 °C):  $\delta$  = 7.27-7.24 (m, 2H),  $\delta$  = 6.97(d,  $J$  = 8.4 Hz, 2H),  $\delta$  = 6.62 (d,  $J$  = 3.2 Hz, 1H),  $\delta$  = 6.24 (d,  $J$  = 3.2 Hz, 1H),  $\delta$  = 3.78 (dd,  $J$  = 12.2, 8.4 Hz, 1H),  $\delta$  = 3.18 (dd,  $J$  = 17.4, 12.3 Hz, 1H),  $\delta$  = 3.00 (dd,  $J$  = 17.4, 8.4 Hz, 1H),  $\delta$  = 1.25 (s, 9H),  $\delta$  = 0.94 (s, 9H).  $^{13}\text{C}\{^1\text{H}\}$  NMR (100 MHz,  $\text{CDCl}_3$ , 25 °C):  $\delta$  = 184.8, 174.2, 149.4, 149.3, 136.9, 134.3, 134.0, 132.2, 128.8, 128.7, 83.3, 50.3, 35.1, 34.8, 32.7, 29.3, 28.8 ppm; HRMS (ESI/Q-TOF)  $m/z$ :  $[\text{M} + \text{H}]^+$  Calcd for  $\text{C}_{23}\text{H}_{28}\text{ClO}_3$  387.1721; Found 387.1720.

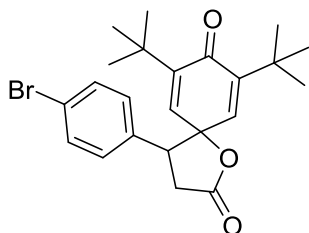

*4-(4-Bromophenyl)-7,9-di-tert-butyl-1-oxaspiro[4.5]deca-6,9-diene-2,8-dione* (**4j**). Yellow solid; yield: 31.0 mg (72%); mp 209.6-210.1 °C; IR (neat): 2966, 1793, 1668, 1645, 1490, 1451, 1391, 1127, 979, 604 $\text{cm}^{-1}$ ;  $^1\text{H}$  NMR (400 MHz,  $\text{CDCl}_3$ , TMS, 25 °C):  $\delta$  = 7.40 (d,  $J$  = 8.5 Hz, 2H),  $\delta$  = 6.90 (d,  $J$  = 8.4 Hz, 2H),  $\delta$  = 6.61 (d,  $J$  = 3.2 Hz, 1H),  $\delta$  = 6.22 (d,  $J$  = 3.2 Hz, 1H),  $\delta$  = 3.76 (dd,  $J$  = 12.2, 8.4 Hz, 1H),  $\delta$  = 3.17 (dd,  $J$  = 17.4, 12.2 Hz, 1H),  $\delta$  = 3.00 (dd,  $J$  = 17.4, 8.4 Hz, 1H),  $\delta$  = 1.25 (s, 9H),  $\delta$  = 0.94 (s, 9H);  $^{13}\text{C}\{^1\text{H}\}$  NMR (100 MHz,  $\text{CDCl}_3$ , 25 °C):  $\delta$  = 184.8, 174.2, 149.5, 149.4, 136.9, 133.9, 132.7, 131.7, 129.0, 122.4, 83.2, 50.3, 35.1, 34.8, 32.6, 29.3, 28.8 ppm; HRMS (ESI/Q-TOF)  $m/z$ :  $[\text{M} + \text{H}]^+$  Calcd for  $\text{C}_{23}\text{H}_{28}\text{BrO}_3$  431.1216; Found 431.1212.

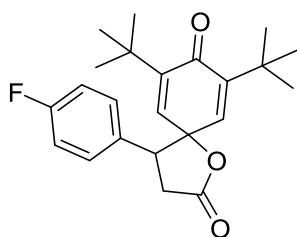

*7,9-Di-tert-butyl-4-(4-fluorophenyl)-1-oxaspiro[4.5]deca-6,9-diene-2,8-dione* (**4k**).

Yellow solid; yield: 32.9 mg (89%); mp 204.4-205.2 °C; IR (neat): 2918, 1794, 1667, 1645, 1513, 1451, 1366, 1189, 1161, 981 $\text{cm}^{-1}$ ;  $^1\text{H}$  NMR (400 MHz,  $\text{CDCl}_3$ , TMS, 25 °C):  $\delta$  = 7.03-6.94 (m, 4H),  $\delta$  = 6.62 (d,  $J$  = 3.2 Hz, 1H),  $\delta$  = 6.26 (d,  $J$  = 3.1 Hz, 1H),  $\delta$  = 3.79 (dd,  $J$  = 12.3, 8.4 Hz, 1H),  $\delta$  = 3.18 (dd,  $J$  = 17.4, 12.4 Hz, 1H),  $\delta$  = 3.00 (dd,  $J$  = 17.4, 8.3 Hz, 1H),  $\delta$  = 1.25 (s, 9H),  $\delta$  = 0.95 (s, 9H);  $^{13}\text{C}\{^1\text{H}\}$  NMR (100 MHz,  $\text{CDCl}_3$ , 25 °C):  $\delta$  = 184.8, 174.3, 163.7, 161.3, 149.4, 149.3, 136.9, 134.1, 129.4, 129.3, 129.2, 129.1, 115.6, 115.4, 83.5, 83.4, 50.2, 35.0, 34.8, 32.9, 29.3, 28.8 ppm; HRMS (ESI/Q-TOF)  $m/z$ :  $[\text{M} + \text{H}]^+$  Calcd for  $\text{C}_{23}\text{H}_{28}\text{FO}_3$  371.2017; Found 371.2019.

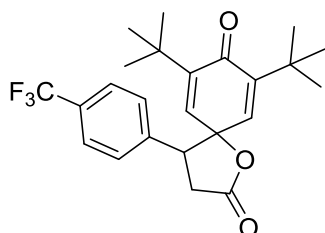

*7,9-Di-tert-butyl-4-(4-(trifluoromethyl)phenyl)-1-oxaspiro[4.5]deca-6,9-diene-2,8-dione (4l)*. White solid; yield: 35.3 mg (84%); mp 161.3-161.9 °C; IR (neat): 2959, 1779, 1670, 1645, 1622, 1486, 1461, 1326, 1119, 1072, 980 $\text{cm}^{-1}$ ;  $^1\text{H}$  NMR (400 MHz,  $\text{CDCl}_3$ , TMS, 25 °C):  $\delta$  = 7.54 (d,  $J$  = 8.2 Hz, 2H),  $\delta$  = 7.17 (d,  $J$  = 8.2 Hz, 2H),  $\delta$  = 6.65 (d,  $J$  = 3.2 Hz, 1H),  $\delta$  = 6.23 (d,  $J$  = 3.2 Hz, 1H),  $\delta$  = 3.88 (dd,  $J$  = 12.2, 8.4 Hz, 1H),  $\delta$  = 3.26 (dd,  $J$  = 17.4, 12.3 Hz, 1H),  $\delta$  = 3.04 (dd,  $J$  = 17.4, 8.4 Hz, 1H),  $\delta$  = 1.26 (s, 9H),  $\delta$  = 0.90 (s, 9H);  $^{13}\text{C}\{^1\text{H}\}$  NMR (100 MHz,  $\text{CDCl}_3$ , 25 °C):  $\delta$  = 184.7, 174.0, 149.6, 149.5, 137.8, 136.8, 133.8, 130.8 (q,  $J_{\text{F-C}}$  = 33.1), 127.9, 125.5 (q,  $J_{\text{F-C}}$  = 3.6), 123.7 (q,  $J_{\text{F-C}}$  = 270.3), 83.1, 50.4, 35.1, 34.8, 32.4, 29.2, 28.7 ppm; HRMS (ESI/Q-TOF)  $m/z$ :  $[\text{M} + \text{H}]^+$  Calcd for  $\text{C}_{24}\text{H}_{28}\text{F}_3\text{O}_3$  421.1985; Found 421.1987.

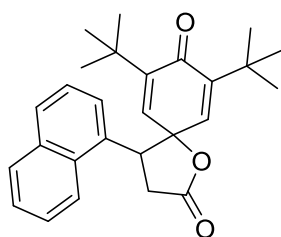

*7,9-Di-tert-butyl-4-(naphthalen-1-yl)-1-oxaspiro[4.5]deca-6,9-diene-2,8-dione (4n)*. Yellow solid; yield: 36.2 mg (90%); mp 169.3-169.9 °C; IR (neat): 2955, 1776, 1668, 1644, 1512, 1456, 1346, 1049, 814 $\text{cm}^{-1}$ ;  $^1\text{H}$  NMR (400 MHz,  $\text{CDCl}_3$ , TMS, 25 °C):  $\delta$  = 7.83-7.77 (m, 2H),  $\delta$  = 7.71-6.68 (m, 1H),  $\delta$  = 7.48-7.36 (m, 4H),  $\delta$  = 6.78 (d,  $J$  = 2.7 Hz, 1H),  $\delta$  = 6.02 (t,  $J$  = 3.0 Hz, 1H),  $\delta$  = 4.72 (t,  $J$  = 8.2 Hz, 1H),  $\delta$  = 3.30 (d,  $J$  = 8.1 Hz, 1H),  $\delta$  = 1.18 (s, 9H),  $\delta$  = 0.65 (s, 9H);  $^{13}\text{C}\{^1\text{H}\}$  NMR (100 MHz,  $\text{CDCl}_3$ , 25 °C):  $\delta$  = 184.9, 173.7, 149.8, 149.4, 136.9, 136.5, 133.7, 127.1, 125.4, 125.1, 83.2, 46.2, 35.1, 34.8, 34.3, 29.3, 28.8 ppm; HRMS (ESI/Q-TOF)  $m/z$ :  $[\text{M} + \text{H}]^+$  Calcd for  $\text{C}_{27}\text{H}_{31}\text{O}_3$  403.2268; Found 403.2269.

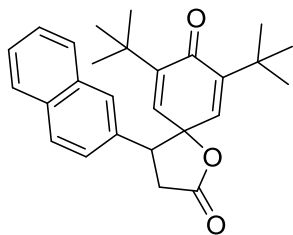

*7,9-Di-tert-butyl-4-(naphthalen-2-yl)-1-oxaspiro[4.5]deca-6,9-diene-2,8-dione (4o)*. Yellow solid; yield: 31.0 mg (77%); mp 162.5-163.3 °C; IR (neat): 2958, 1777, 1670, 1648, 1510, 1483, 1459, 1182, 814cm<sup>-1</sup>; <sup>1</sup>H NMR (400 MHz, CDCl<sub>3</sub>, TMS, 25 °C): δ = 7.78-7.70 (m, 3H), δ = 7.49-7.43 (m, 3H), δ = 7.11 (dd, *J* = 8.5, 1.5 Hz, 1H), δ = 6.29 (d, *J* = 3.1 Hz, 1H), δ = 3.96 (dd, *J* = 12.0, 8.4 Hz, 1H), δ = 3.37 (dd, *J* = 17.4, 12.1 Hz, 1H), δ = 3.09 (dd, *J* = 17.4, 8.3 Hz, 1H), δ = 1.27 (s, 9H), δ = 0.76 (s, 9H); <sup>13</sup>C{<sup>1</sup>H} NMR (100 MHz, CDCl<sub>3</sub>, 25 °C): δ = 184.8, 174.7, 149.2, 148.9, 137.3, 134.5, 132.9, 131.1, 128.4, 127.6, 126.7, 126.6, 126.5, 125.0, 83.7, 50.9, 35.0, 34.6, 32.8, 29.3, 28.6 ppm; HRMS (ESI/Q-TOF) *m/z*: [M + H]<sup>+</sup> Calcd for C<sub>27</sub>H<sub>31</sub>O<sub>3</sub> 403.2268; Found 403.2267.

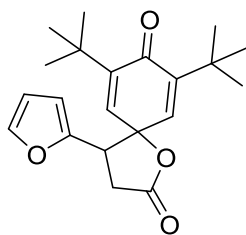

*7,9-Di-tert-butyl-4-(furan-2-yl)-1-oxaspiro[4.5]deca-6,9-diene-2,8-dione (4p)*. Red solid; yield: 20.5 mg (60%); mp 117.3-118.3 °C; IR (neat): 2954, 1775, 1667, 1643, 1511, 1455, 1199, 1083, 973cm<sup>-1</sup>; <sup>1</sup>H NMR (400 MHz, CDCl<sub>3</sub>, TMS, 25 °C): δ = 7.28 (d, *J* = 1.1 Hz, 1H), δ = 6.55 (d, *J* = 3.1 Hz, 1H), δ = 6.32 (d, *J* = 3.2 Hz, 1H), δ = 6.26 (dd, *J* = 3.1, 1.9 Hz, 1H), δ = 6.02 (d, *J* = 3.2 Hz, 1H), δ = 3.25 (dd, *J* = 17.6, 11.8 Hz, 1H), δ = 3.00 (dd, *J* = 17.6, 8.7 Hz, 1H), δ = 1.26 (s, 9H), δ = 1.03 (s, 9H); <sup>13</sup>C{<sup>1</sup>H} NMR (100 MHz, CDCl<sub>3</sub>, 25 °C): δ = 185.1, 174.1, 149.0, 148.8, 148.0, 142.6, 136.7, 134.1, 110.7, 108.4, 82.9, 44.9, 35.0, 34.7, 32.0, 29.3, 28.9 ppm; HRMS (ESI/Q-TOF) *m/z*: [M + H]<sup>+</sup> Calcd for C<sub>21</sub>H<sub>27</sub>O<sub>4</sub> 343.1904; Found 343.1906.

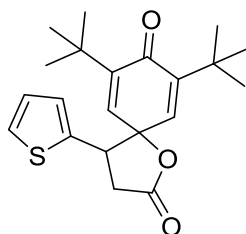

*7,9-Di-tert-butyl-4-(thiophen-2-yl)-1-oxaspiro[4.5]deca-6,9-diene-2,8-dione (4q)*. Yellow solid; yield: 22.9 mg (64%); mp 156.6-157.3 °C; IR (neat): 2957, 1779, 1670, 1648, 1485, 1459, 980, 833cm<sup>-1</sup>; <sup>1</sup>H NMR (400 MHz, CDCl<sub>3</sub>, TMS, 25 °C): δ = 7.17 (d, *J* = 5.1 Hz, 1H), δ = 6.91 (t, *J* = 3.7 Hz, 1H), δ = 6.74 (d, *J* = 3.5 Hz, 1H), δ = 6.58 (d, *J* = 3.2 Hz, 1H), δ = 6.27 (d, *J* = 3.2 Hz, 1H), δ = 4.03 (dd, *J* = 12.2, 8.9 Hz, 1H), δ =

3.21-3.07 (m, 2H),  $\delta = 1.28$  (s, 9H),  $\delta = 0.96$  (s, 9H);  $^{13}\text{C}\{^1\text{H}\}$  NMR (100 MHz,  $\text{CDCl}_3$ , 25 °C):  $\delta = 184.9, 173.7, 149.8, 149.4, 136.9, 136.5, 133.7, 127.04, 125.4, 125.1, 83.2, 46.2, 35.1, 34.8, 34.3, 29.3, 28.8$  ppm; HRMS (ESI/Q-TOF) m/z:  $[\text{M} + \text{H}]^+$  Calcd for  $\text{C}_{21}\text{H}_{27}\text{O}_3\text{S}$  359.1675; Found 359.1674.

## References

- (1) (a) Ge, L.; Lu, X.; Cheng, C.; Chen, J.; Cao, W.; Wu, X.; Zhao, G. *J. Org. Chem.* **2016**, *81*, 9315-9325; (b) Baik, W.; Lee, H. J.; Jang, J. M.; Koo, S.; Kim, B. H. *J. Org. Chem.* **2000**, *65*, 108-115.
- (2) Kayukova, O. V.; Kayukov, Y. S.; Nikolaev, A. N.; Nasakin, O. E. *Russ. J. Org. Chem.* **2004**, *40*, 1382-1383.

## NMR Spectra of Dispirocyclopropanes 3

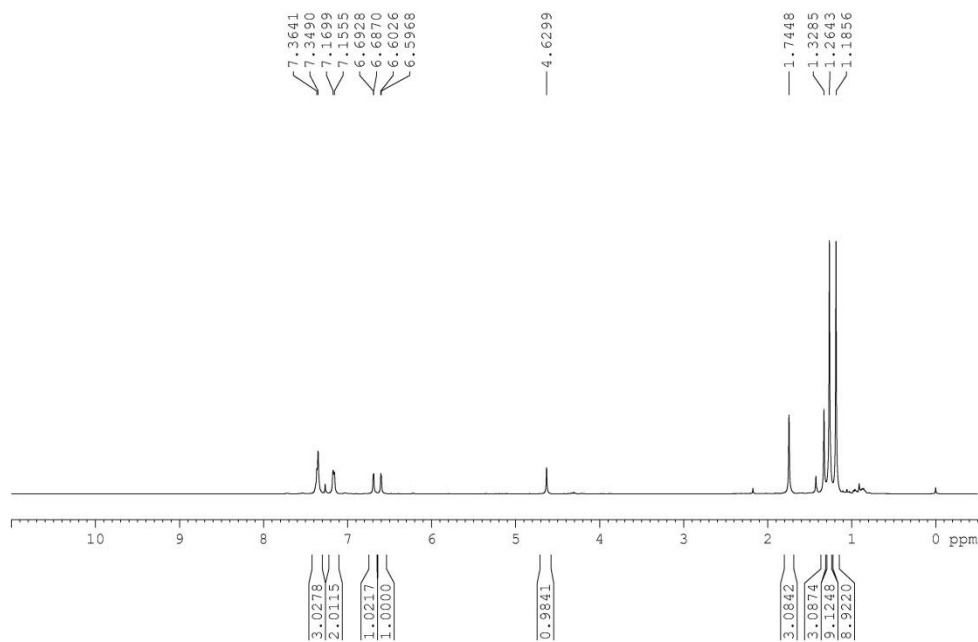

## <sup>1</sup>H NMR Spectra of Product 3aa

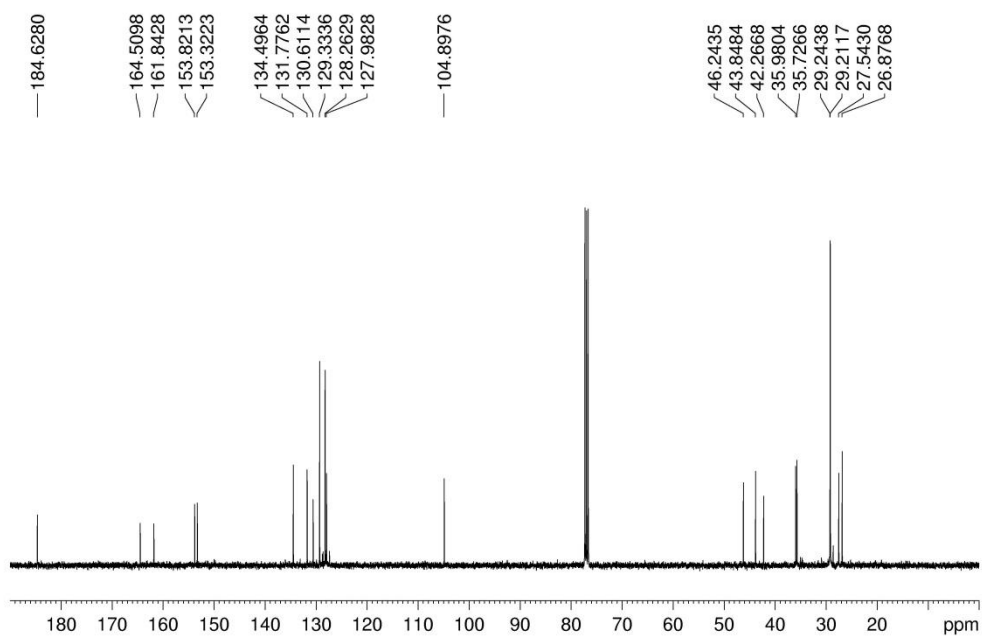

## <sup>13</sup>C NMR Spectra of Product 3aa

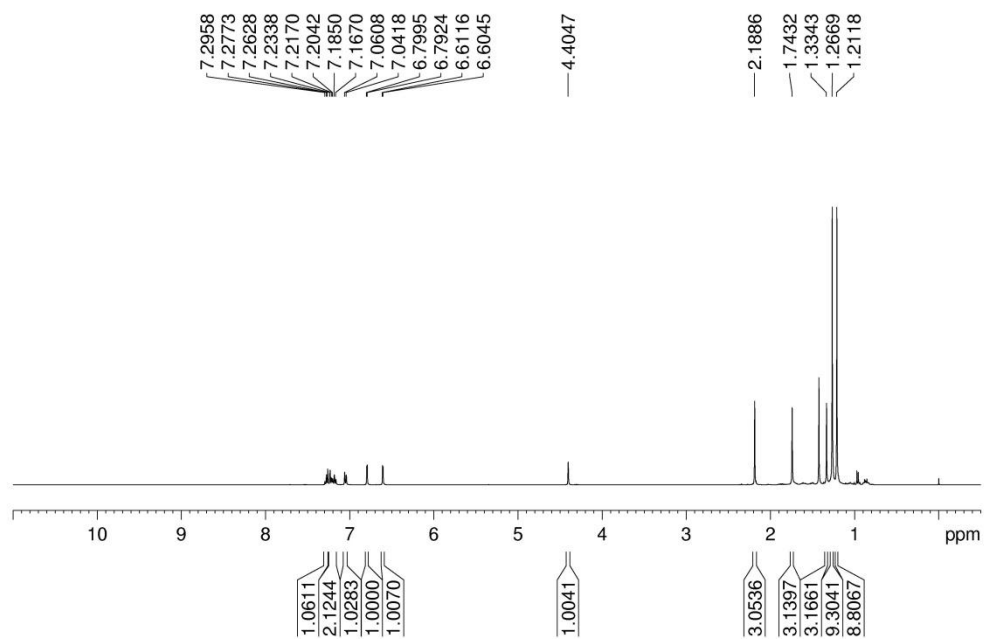

<sup>1</sup>H NMR Spectra of Product **3ba**

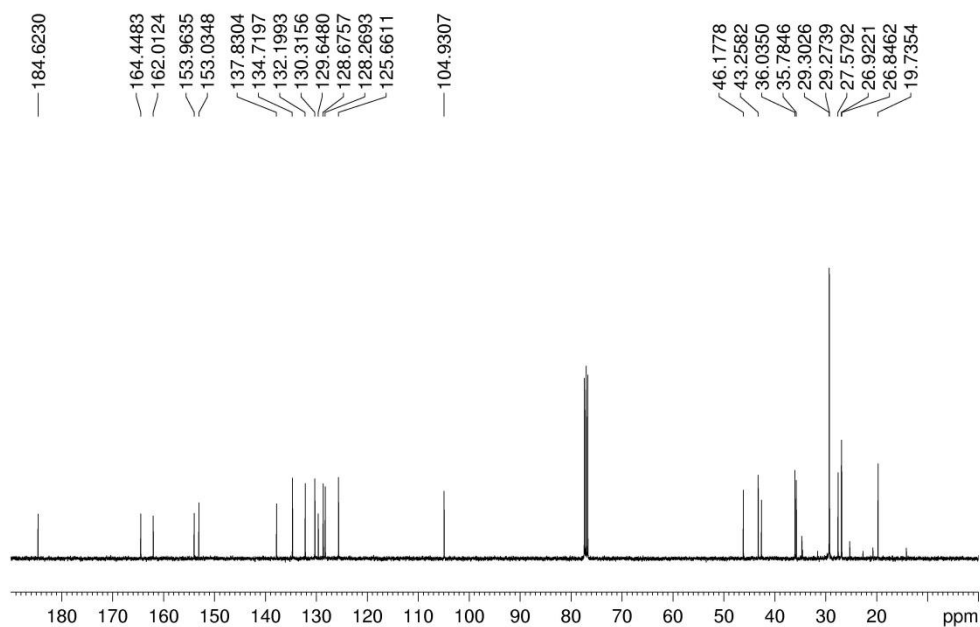

<sup>13</sup>C NMR Spectra of Product **3ba**

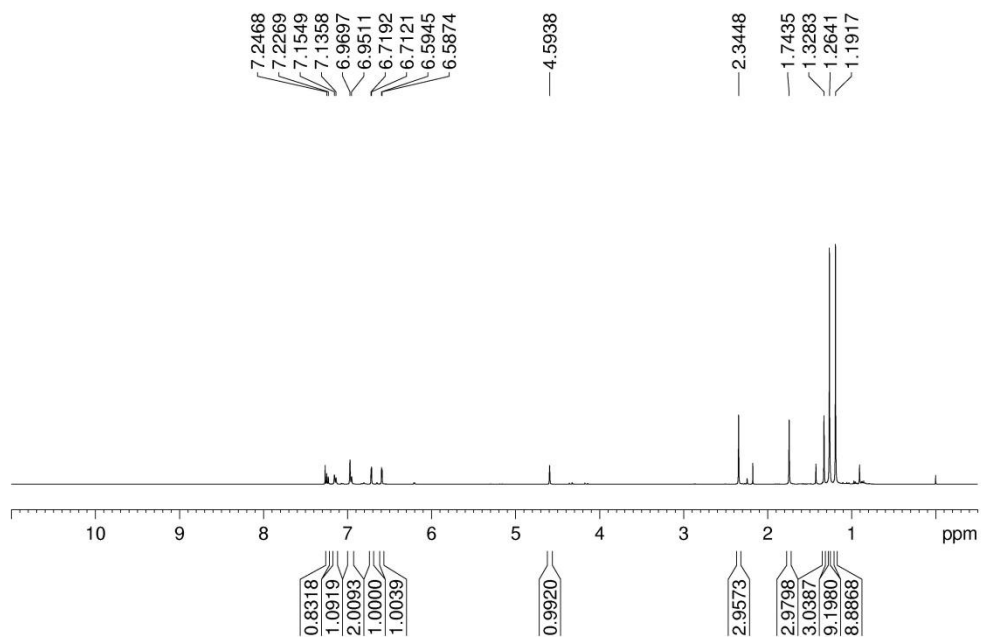

$^1\text{H}$  NMR Spectra of Product **3ca**

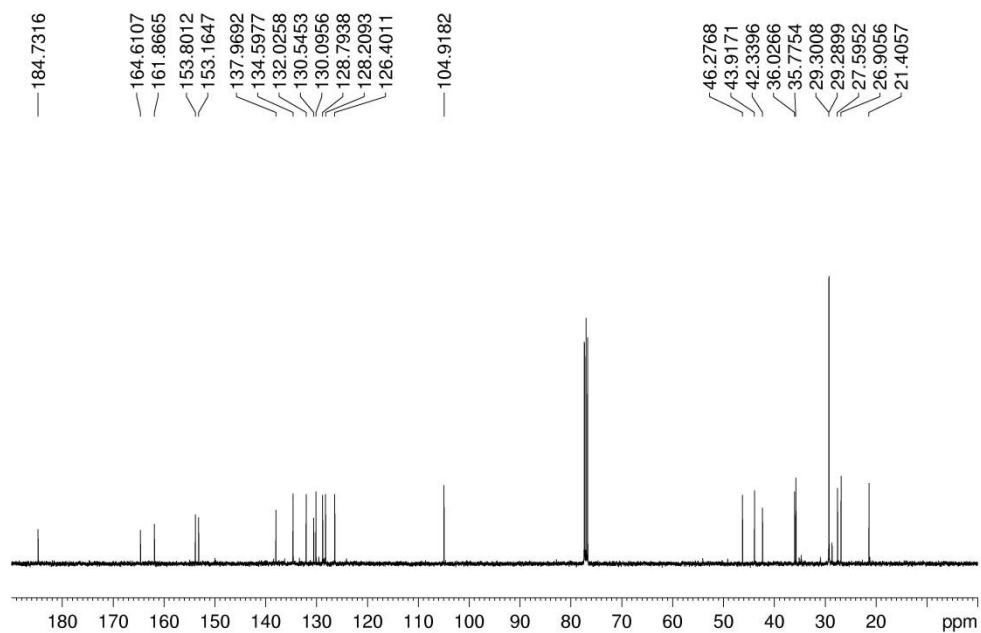

$^{13}\text{C}$  NMR Spectra of Product **3ca**



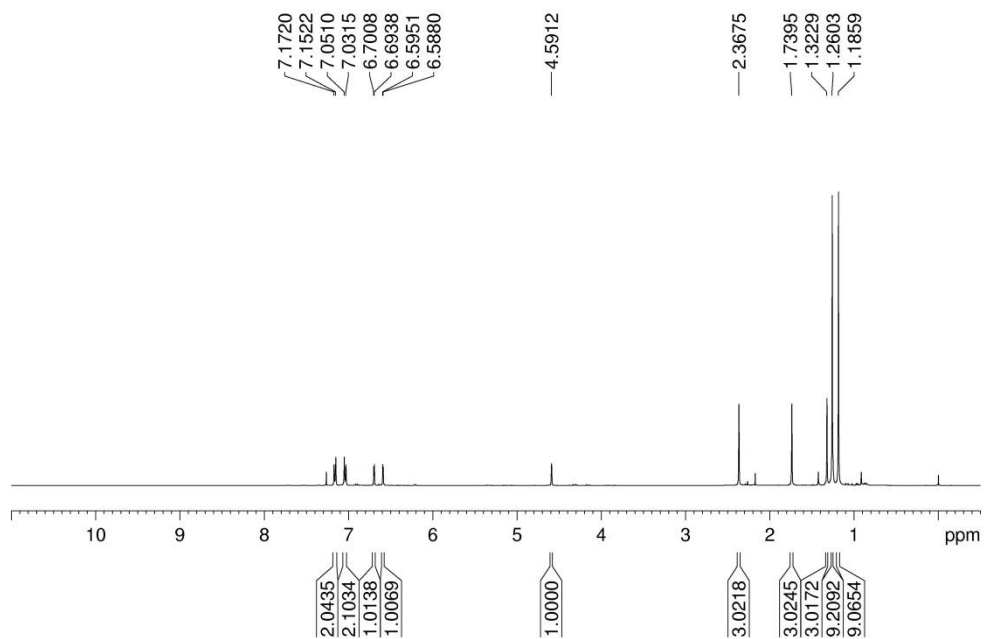

$^1\text{H}$  NMR Spectra of Product **3da**

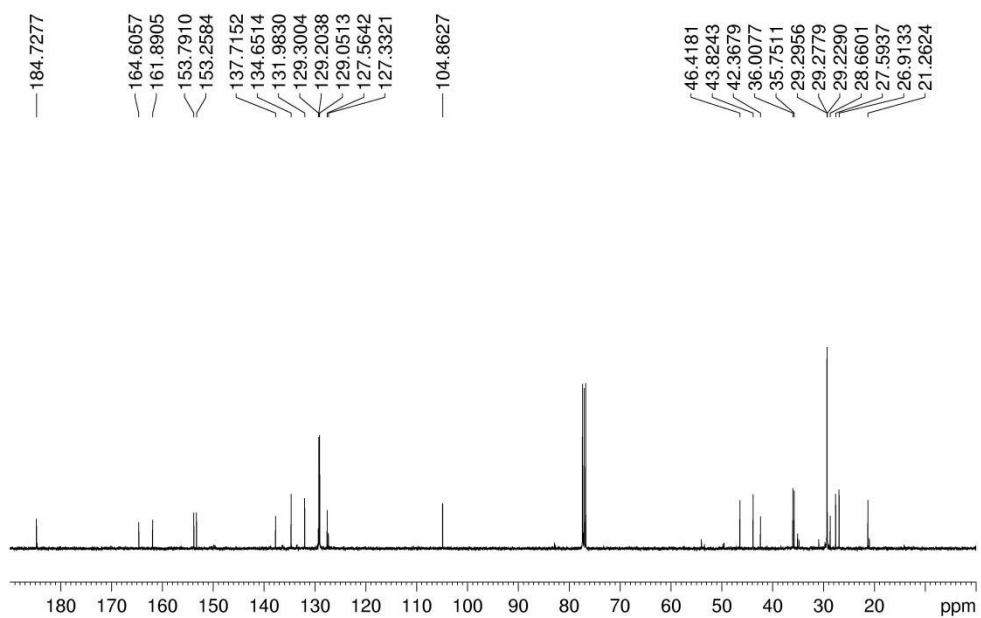

$^{13}\text{C}$  NMR Spectra of Product **3da**

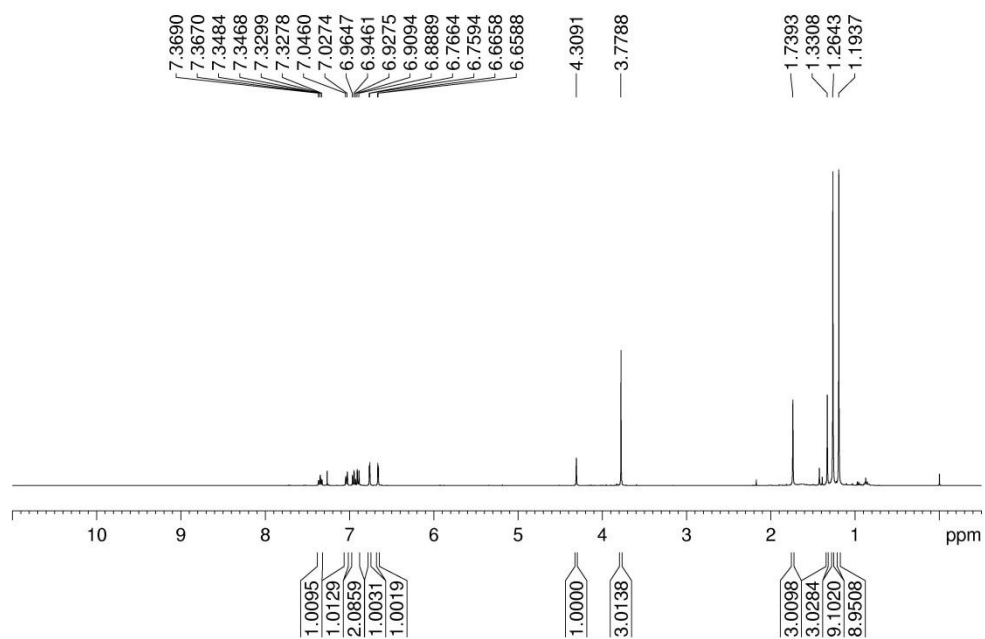

$^1\text{H}$  NMR Spectra of Product **3ea**

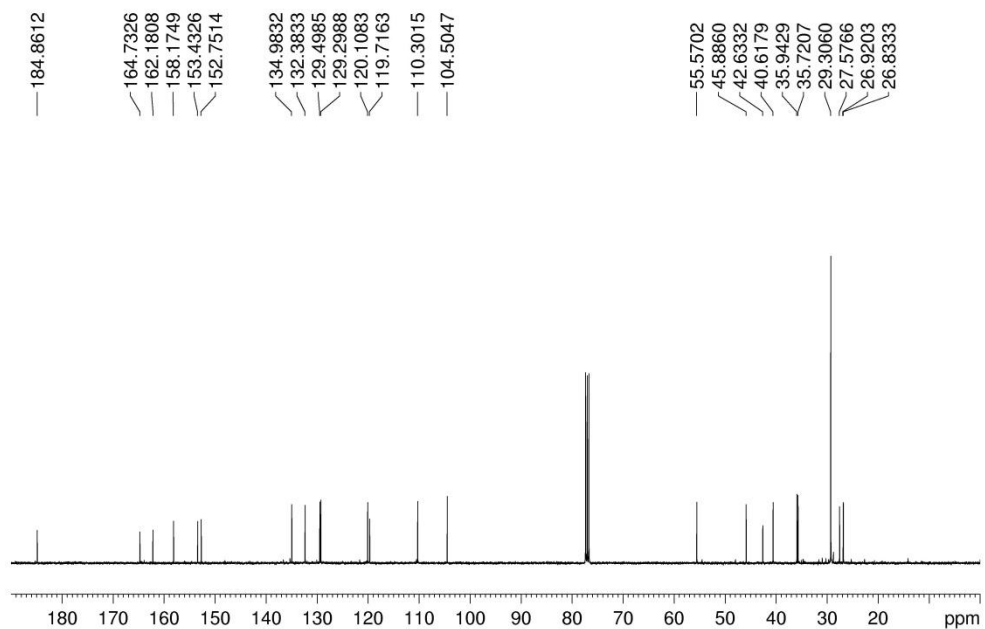

$^{13}\text{C}$  NMR Spectra of Product **3ea**

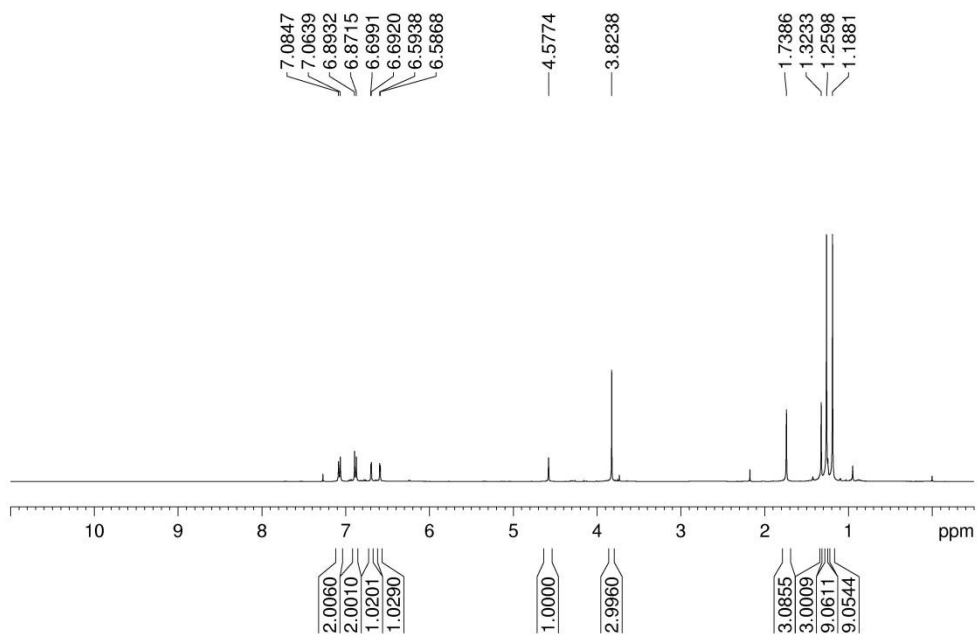

$^1\text{H}$  NMR Spectra of Product **3fa**

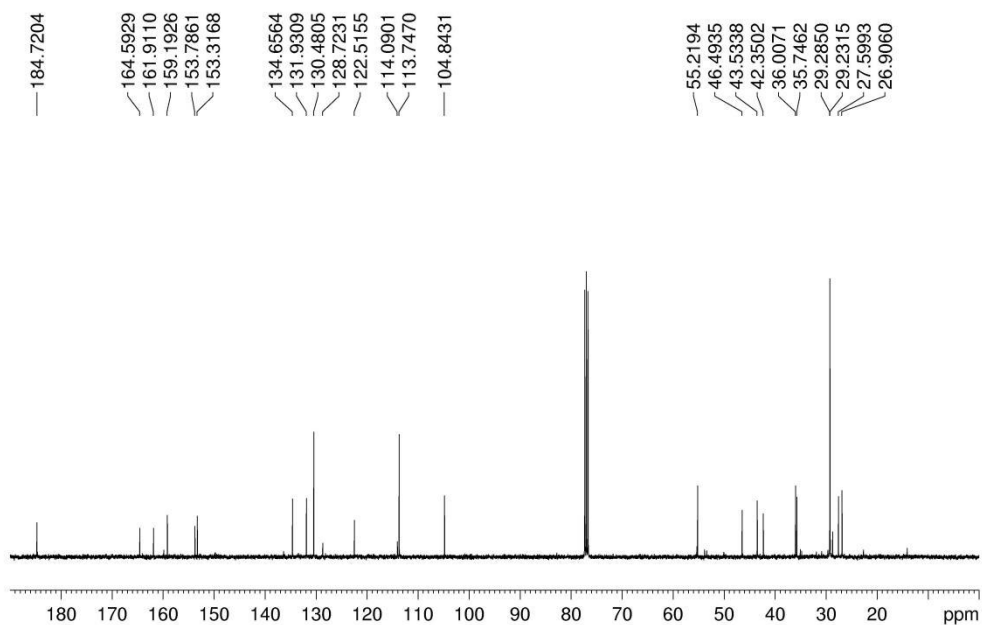

$^{13}\text{C}$  NMR Spectra of Product **3fa**

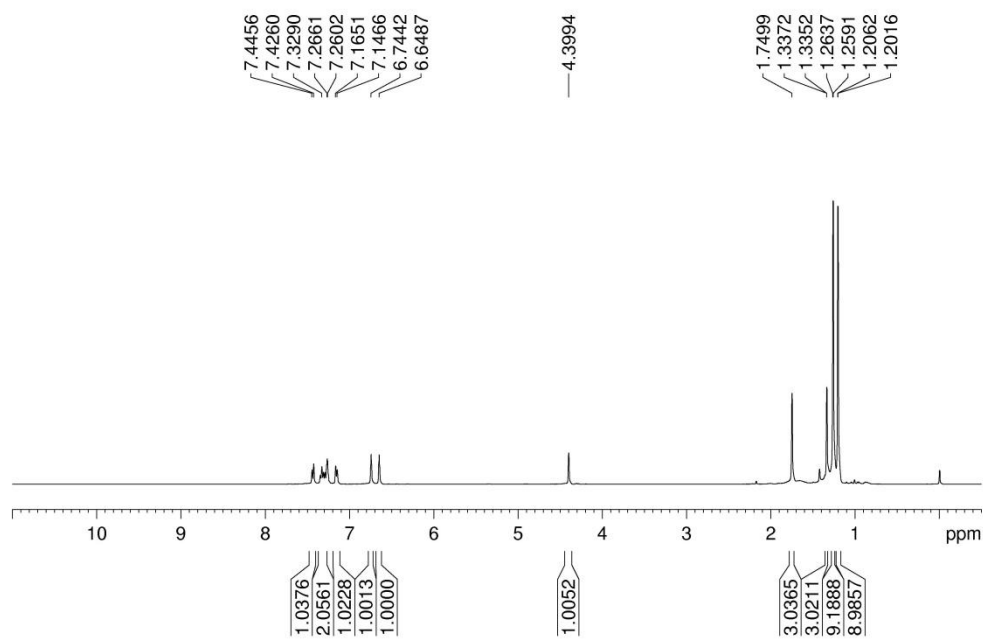

<sup>1</sup>H NMR Spectra of Product **3ga**

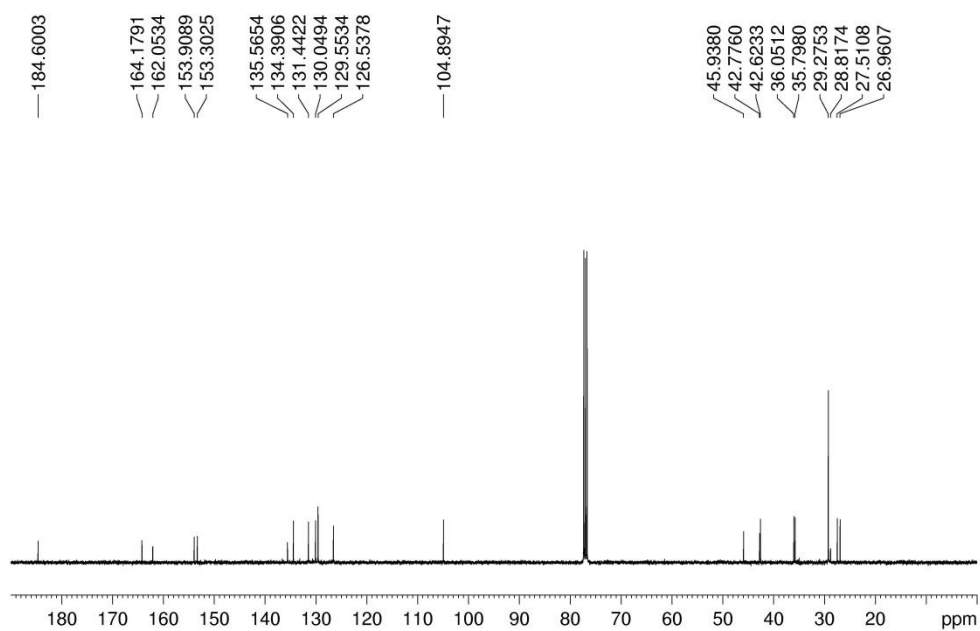

<sup>13</sup>C NMR Spectra of Product **3ga**

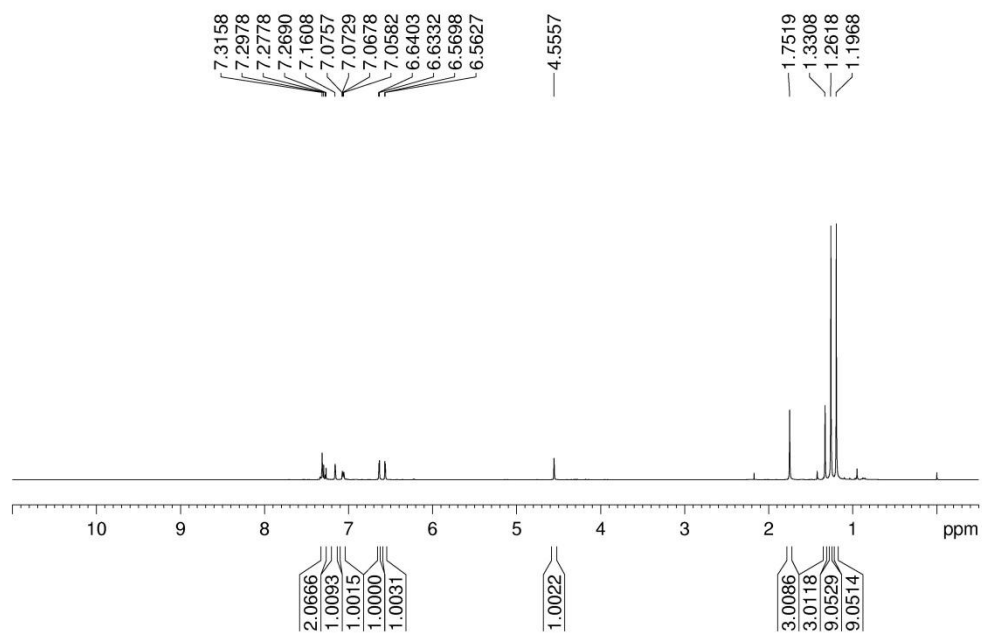

$^1\text{H}$  NMR Spectra of Product **3ha**

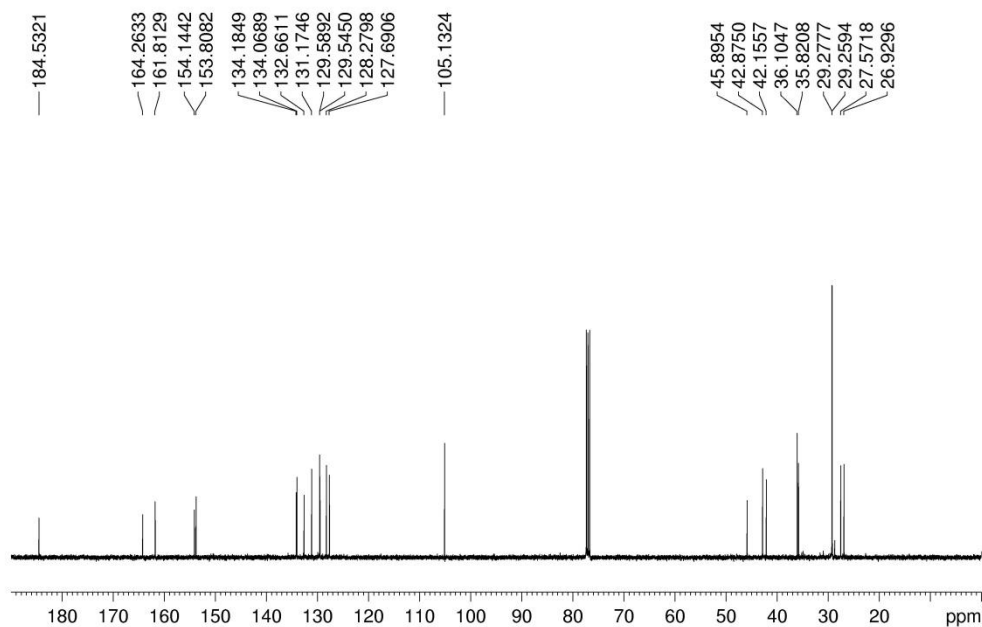

$^{13}\text{C}$  NMR Spectra of Product **3ha**

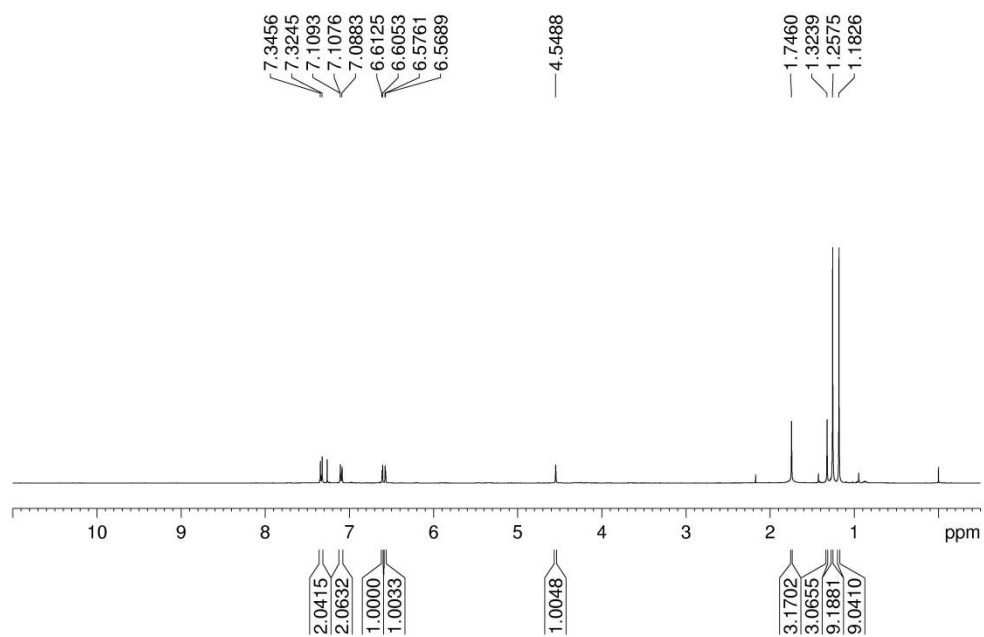

$^1\text{H}$  NMR Spectra of Product **3ia**

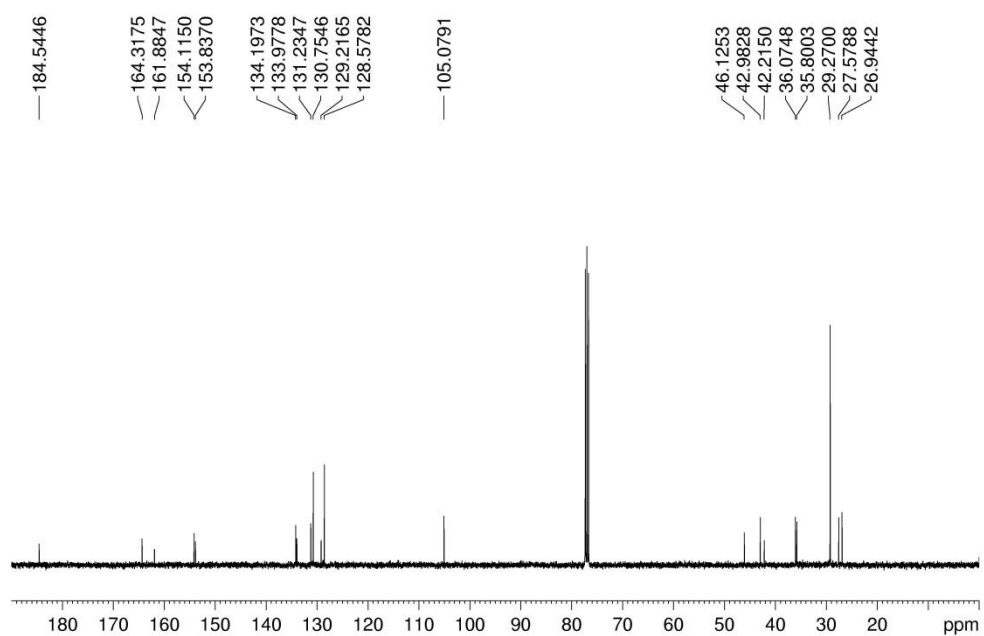

$^{13}\text{C}$  NMR Spectra of Product **3ia**

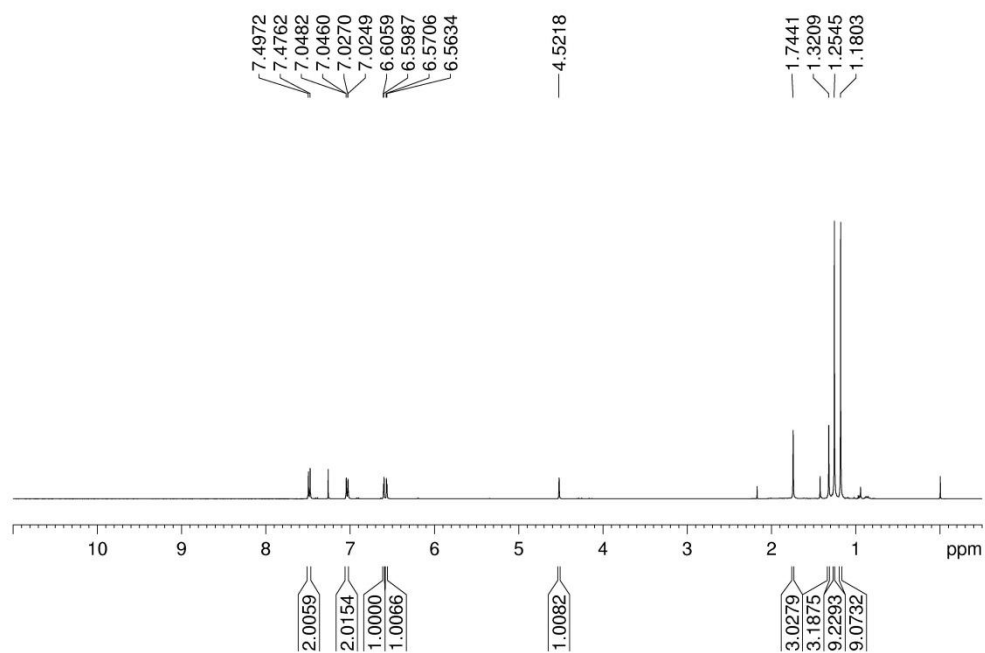

$^1\text{H}$  NMR Spectra of Product **3ja**

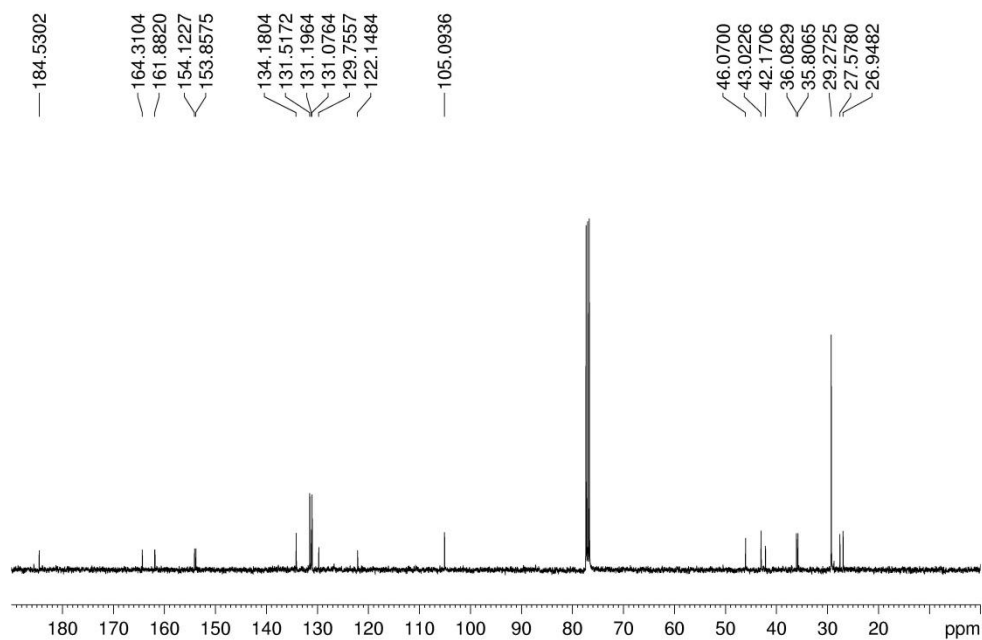

$^{13}\text{C}$  NMR Spectra of Product **3ja**

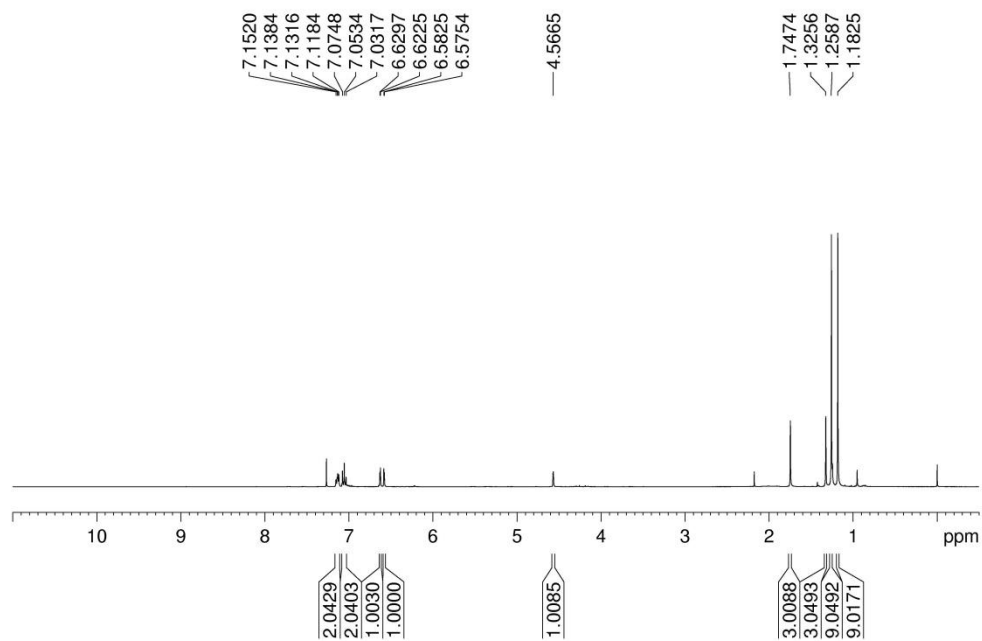

$^1\text{H}$  NMR Spectra of Product **3ka**

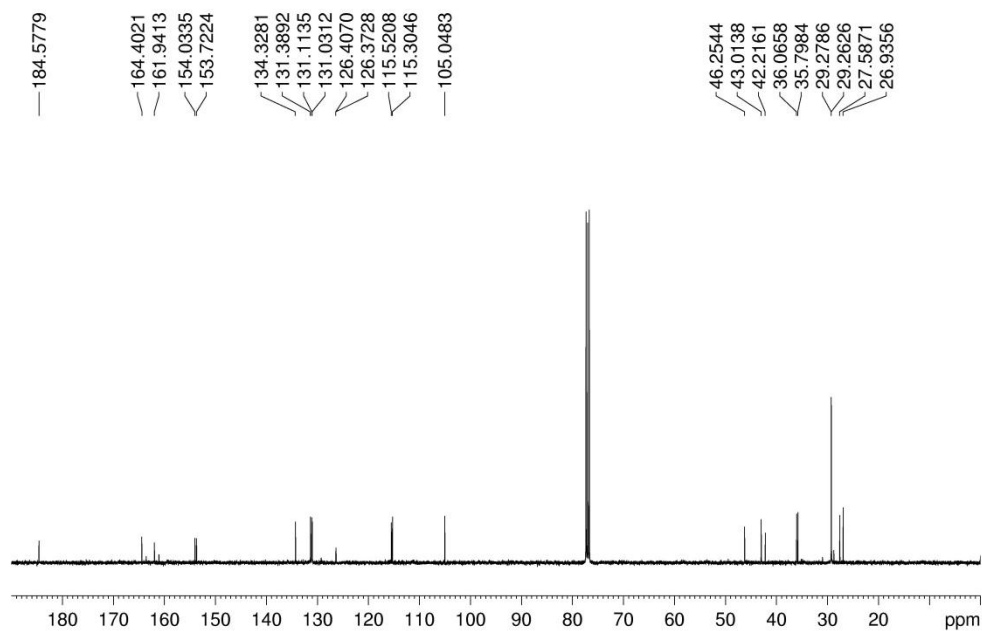

$^{13}\text{C}$  NMR Spectra of Product **3ka**



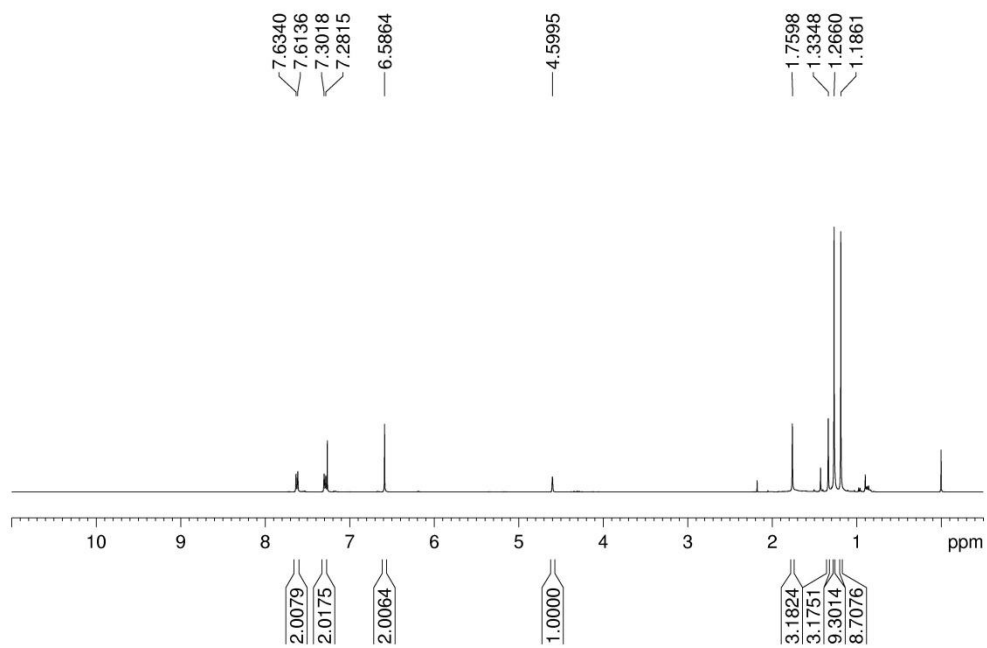

<sup>1</sup>H NMR Spectra of Product **3la**

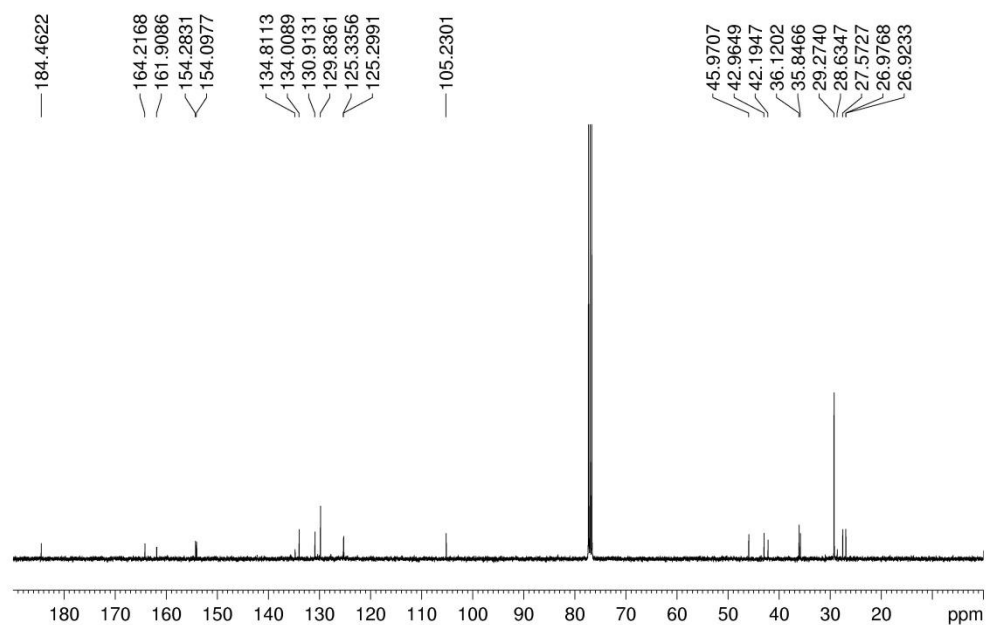

<sup>13</sup>C NMR Spectra of Product **3la**

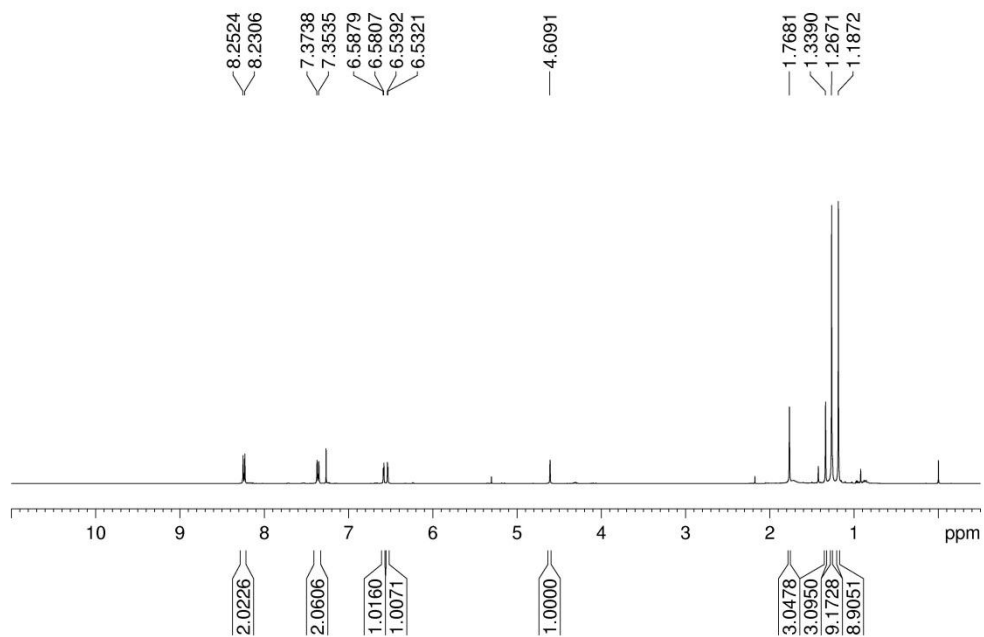

$^1\text{H}$  NMR Spectra of Product **3ma**

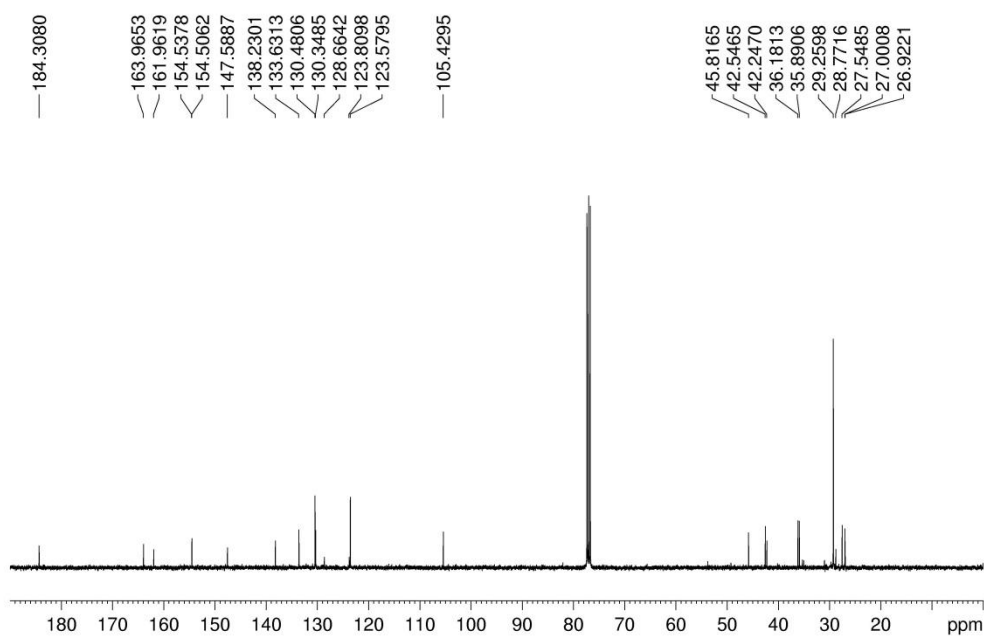

$^{13}\text{C}$  NMR Spectra of Product **3ma**

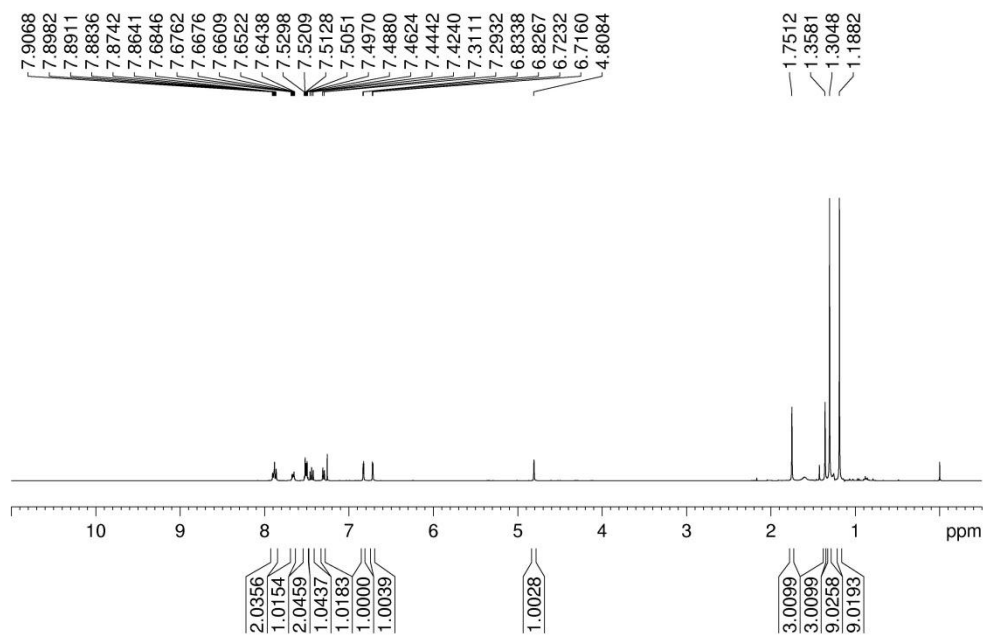

<sup>1</sup>H NMR Spectra of Product **3na**

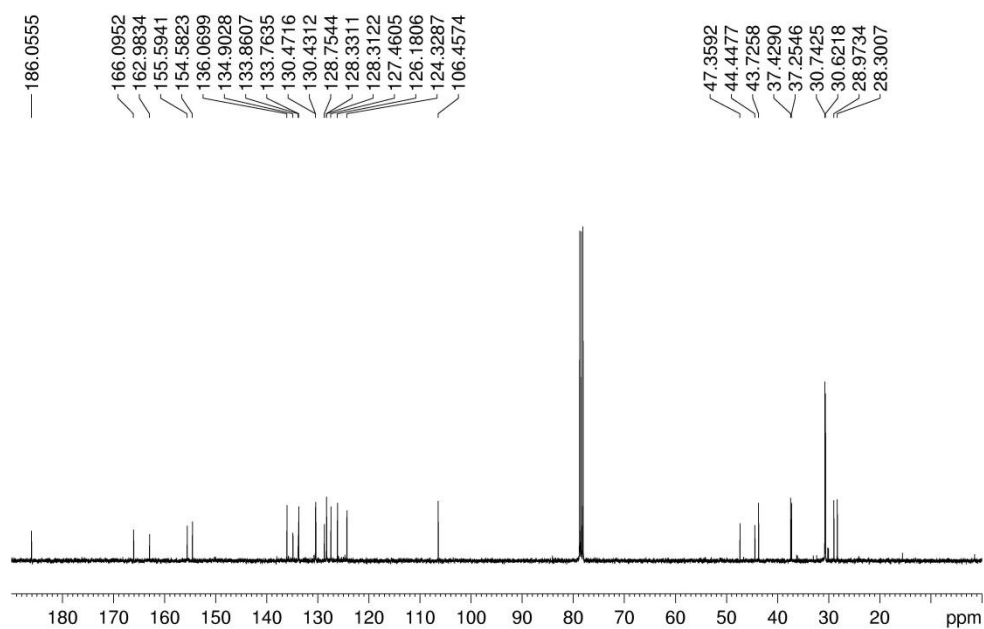

<sup>13</sup>C NMR Spectra of Product **3na**

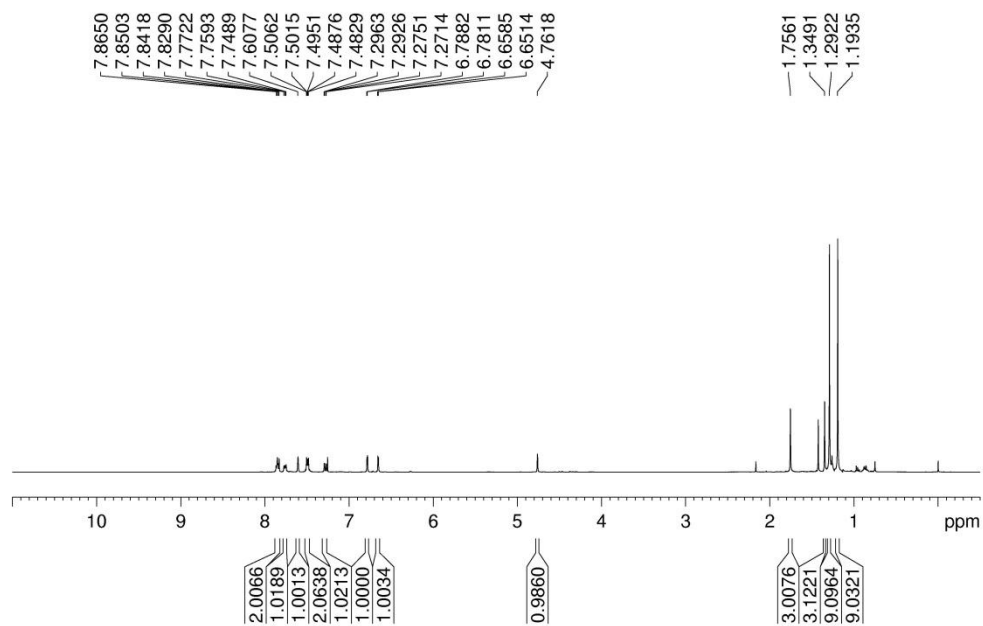

<sup>1</sup>H NMR Spectra of Product 30a

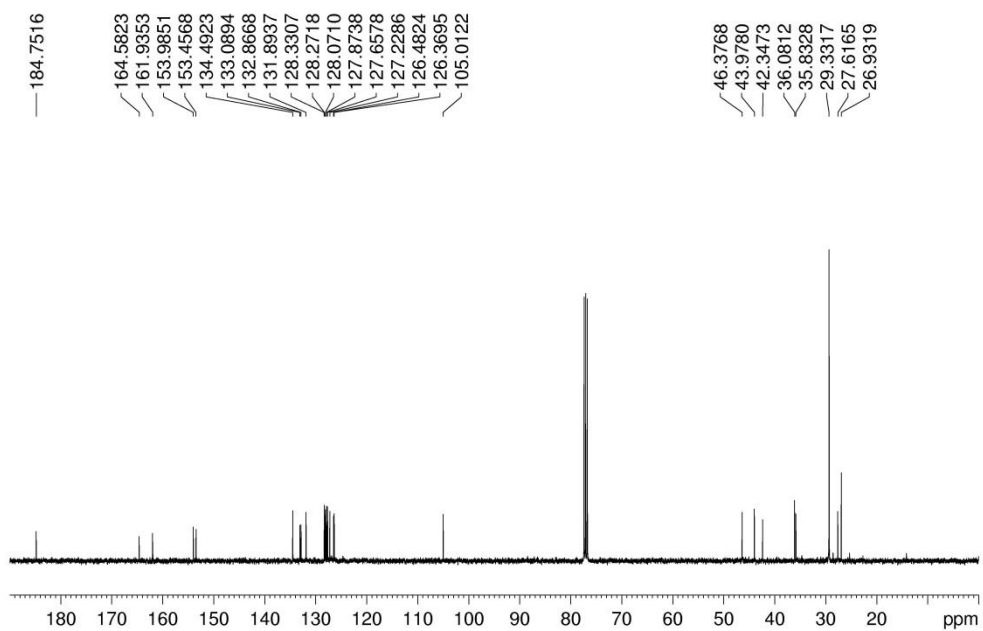

<sup>13</sup>C NMR Spectra of Product 30a

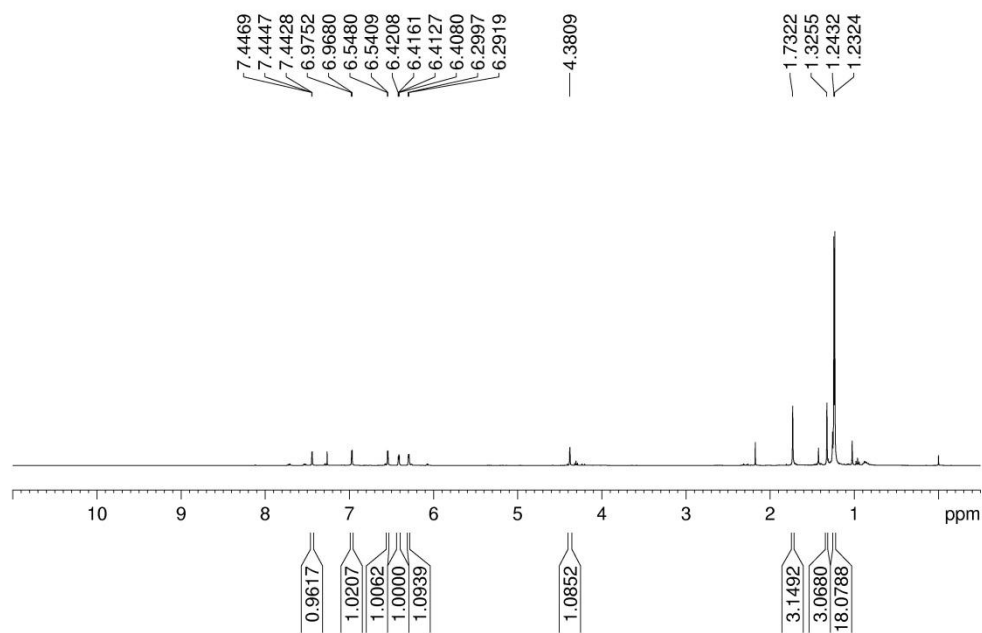

<sup>1</sup>H NMR Spectra of Product **3pa**

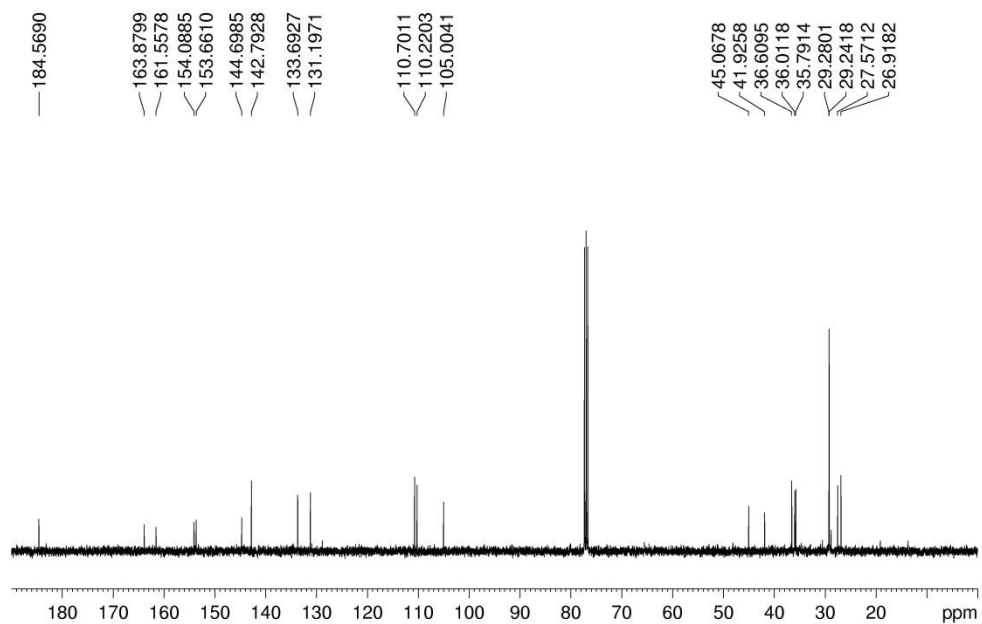

<sup>13</sup>C NMR Spectra of Product **3pa**

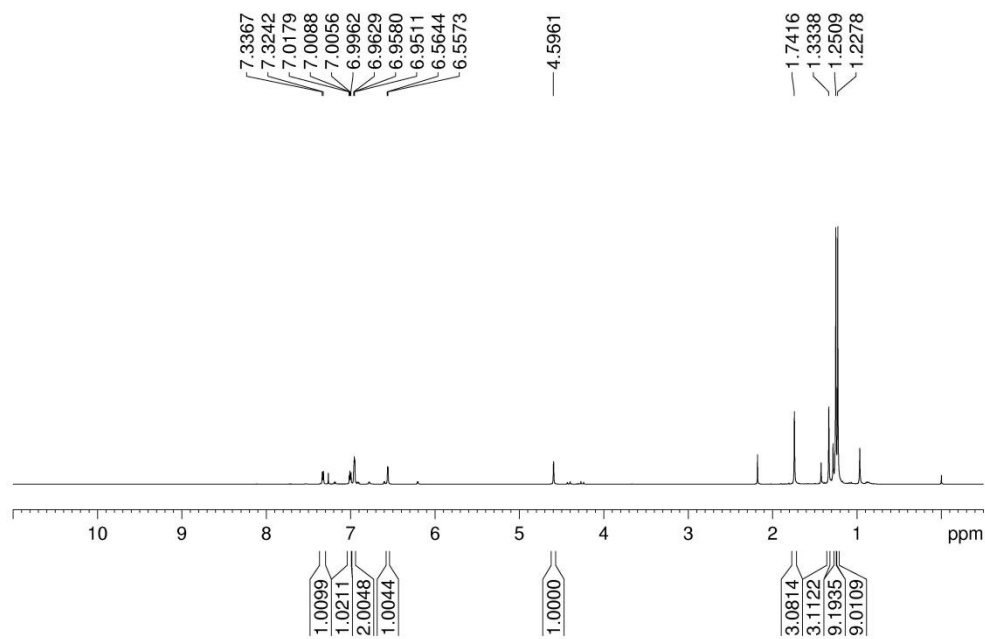

$^1\text{H}$  NMR Spectra of Product **3qa**

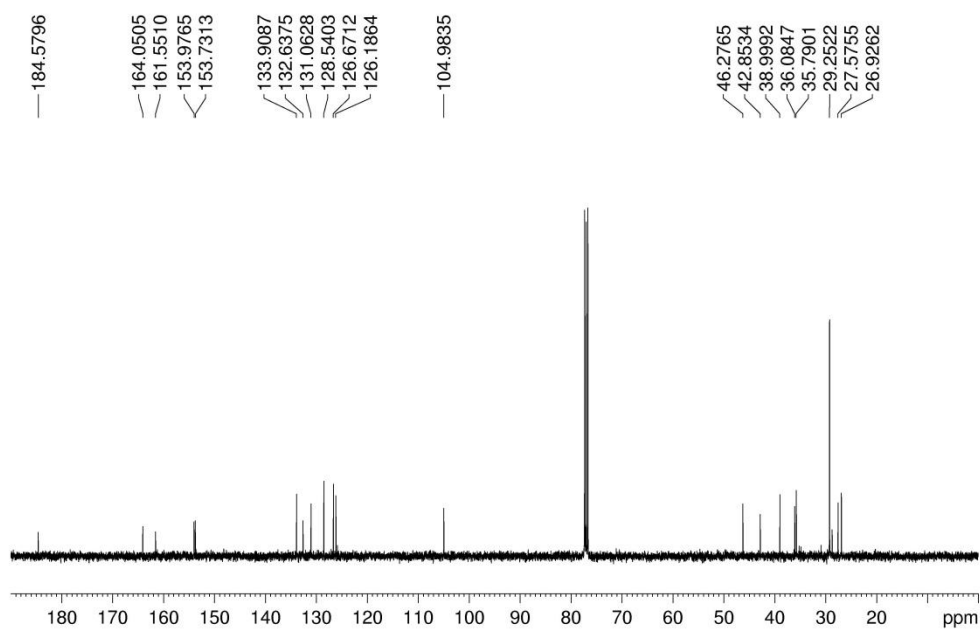

$^{13}\text{C}$  NMR Spectra of Product **3qa**

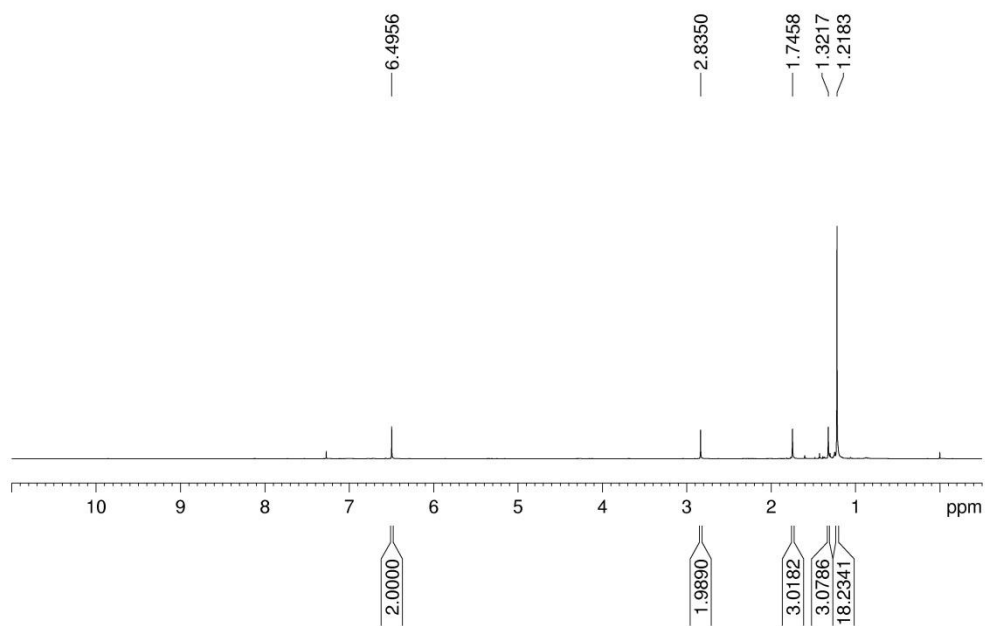

<sup>1</sup>H NMR Spectra of Product **3ra**

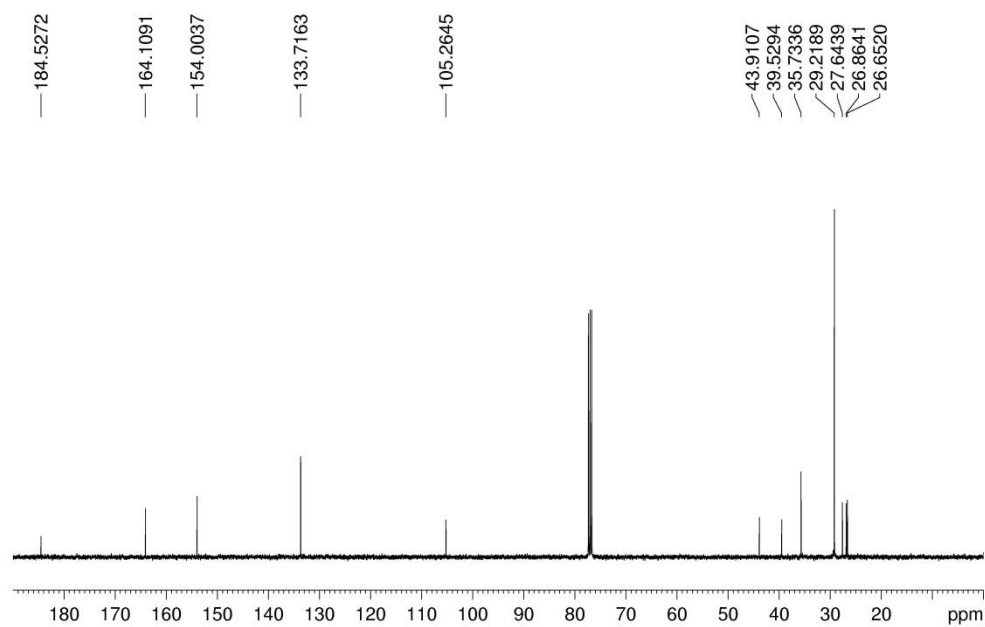

<sup>13</sup>C NMR Spectra of Product **3ra**

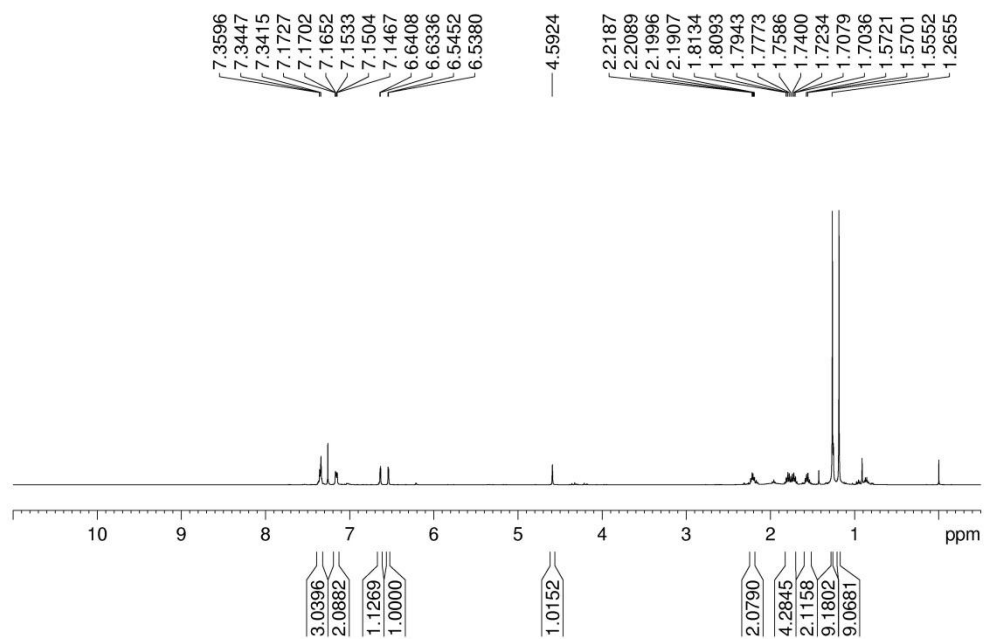

$^1\text{H}$  NMR Spectra of Product **3ab**

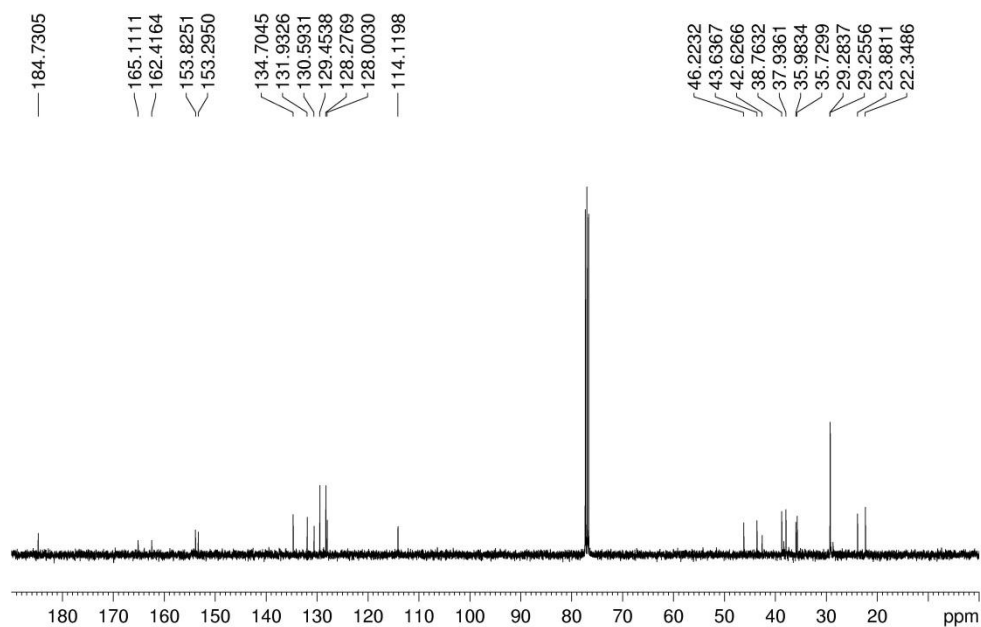

$^{13}\text{C}$  NMR Spectra of Product **3ab**



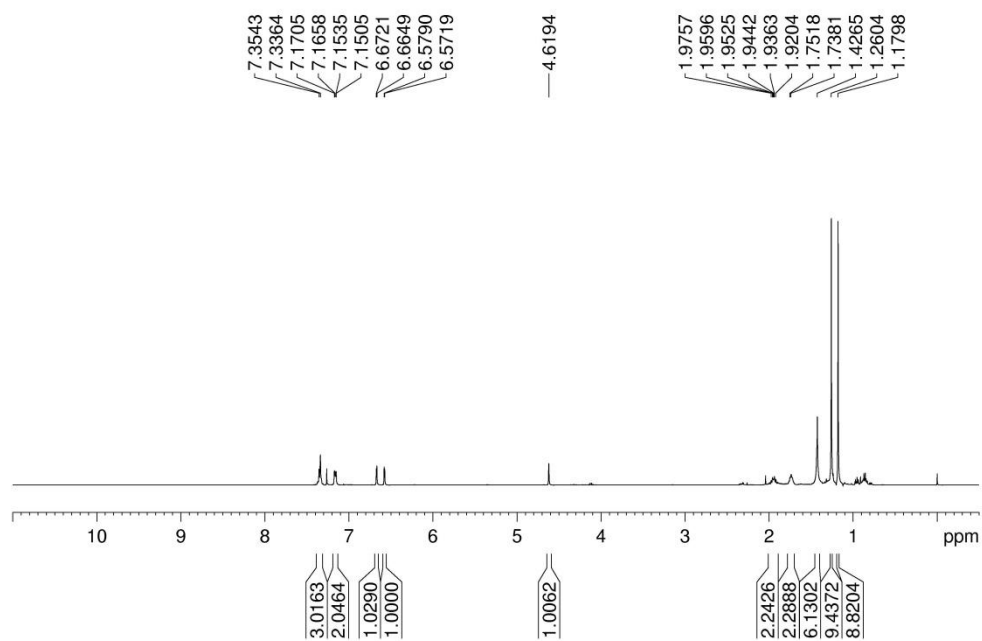

<sup>1</sup>H NMR Spectra of Product **3ac**

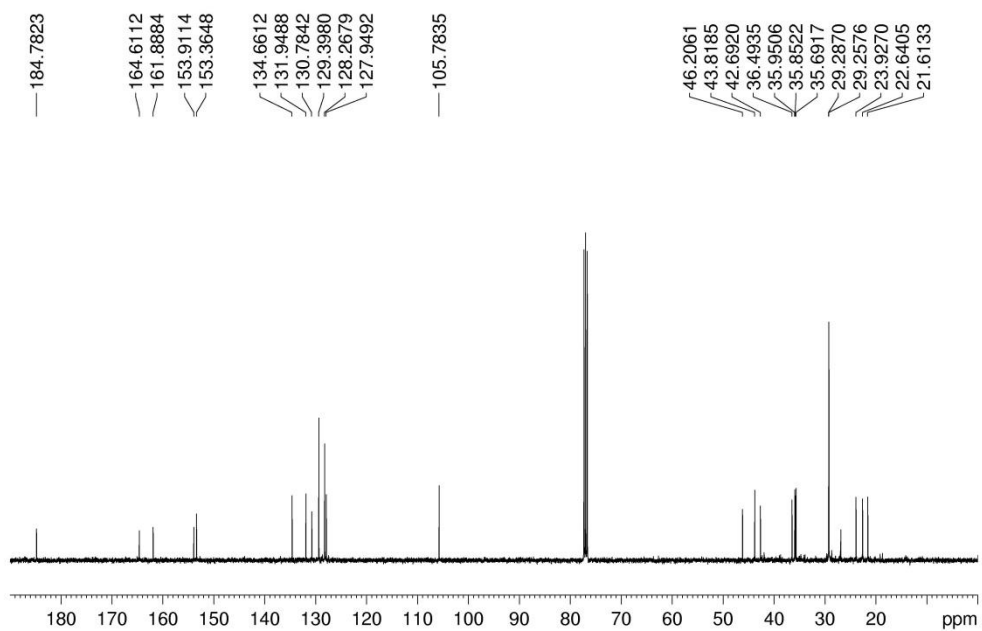

<sup>13</sup>C NMR Spectra of Product **3ac**

## NMR Spectra of Spirobutyrolactones 4

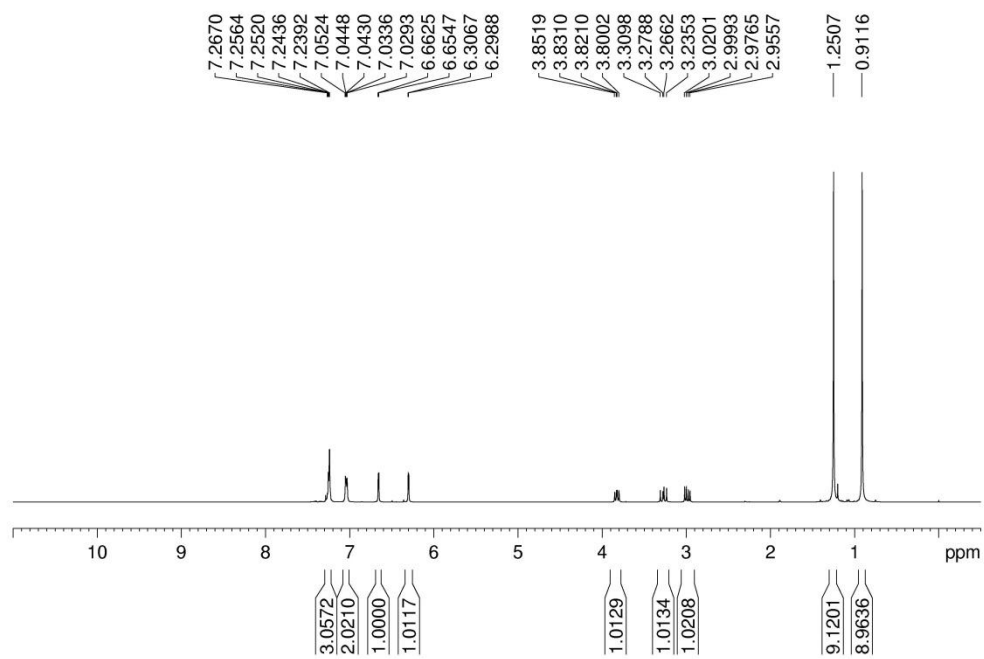

<sup>1</sup>H NMR Spectra of Product 4a

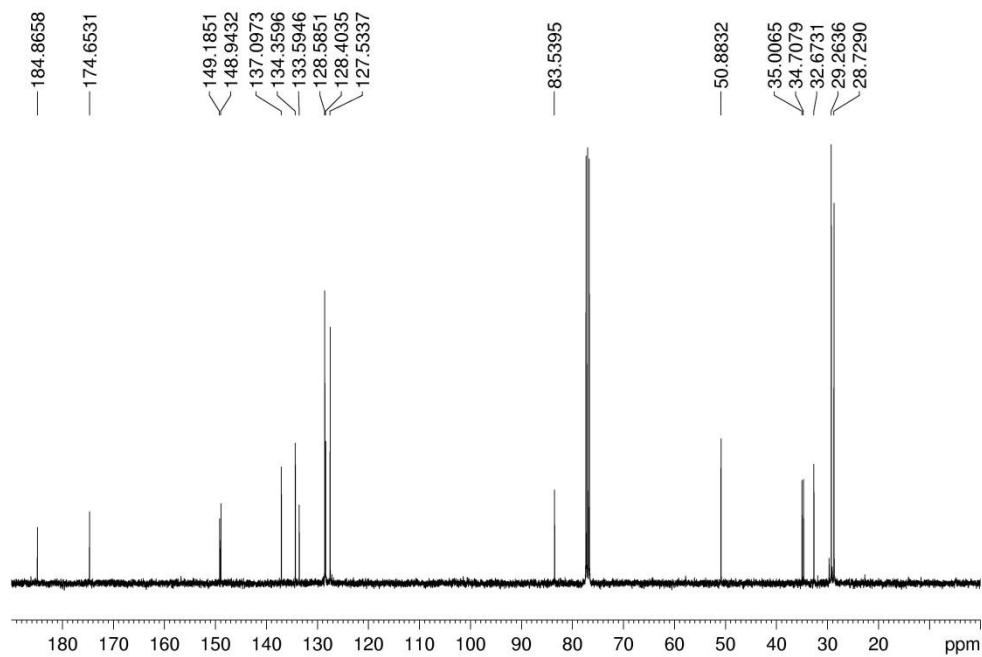

<sup>13</sup>C NMR Spectra of Product 4a

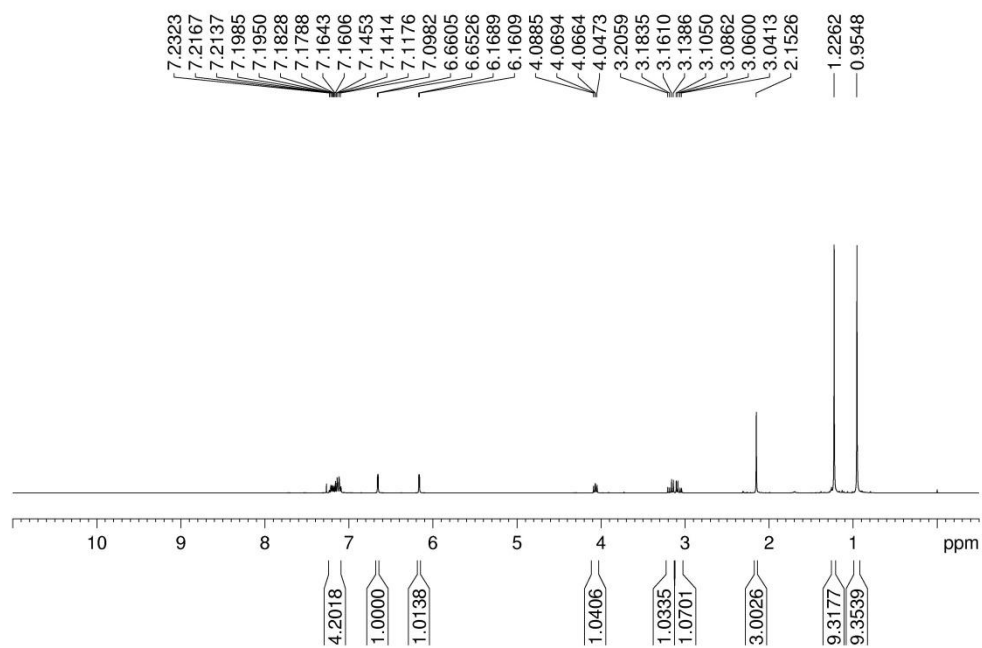

<sup>1</sup>H NMR Spectra of Product **4b**

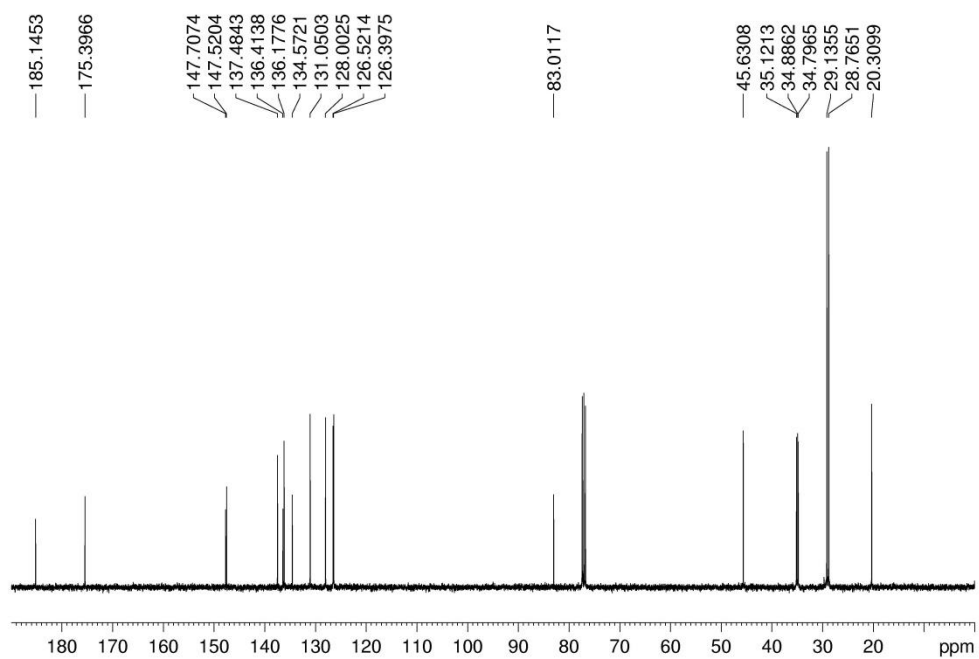

<sup>13</sup>C NMR Spectra of Product **4b**

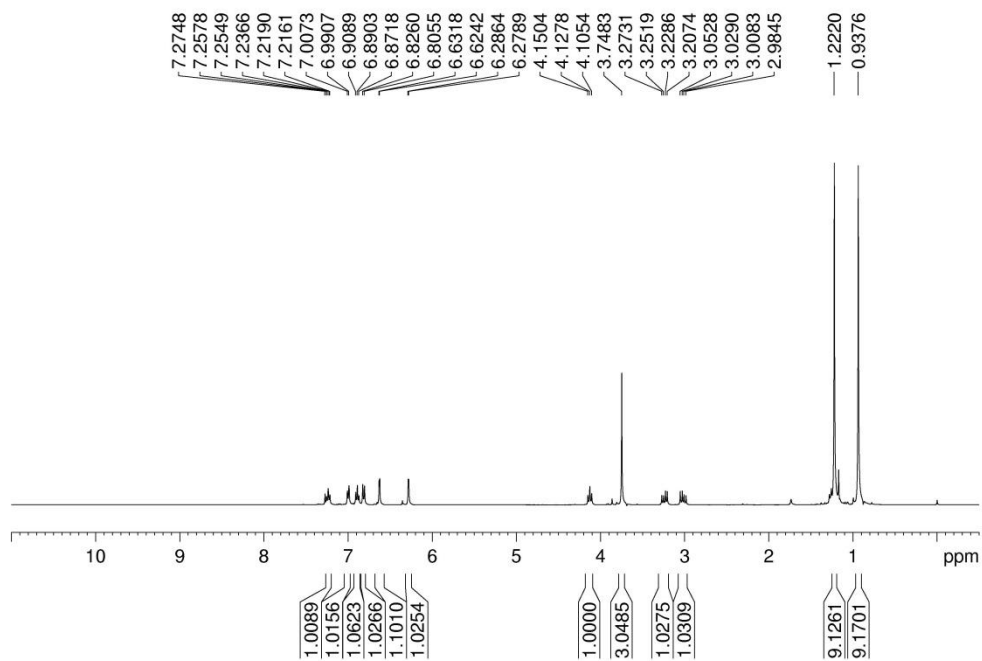

<sup>1</sup>H NMR Spectra of Product 4c

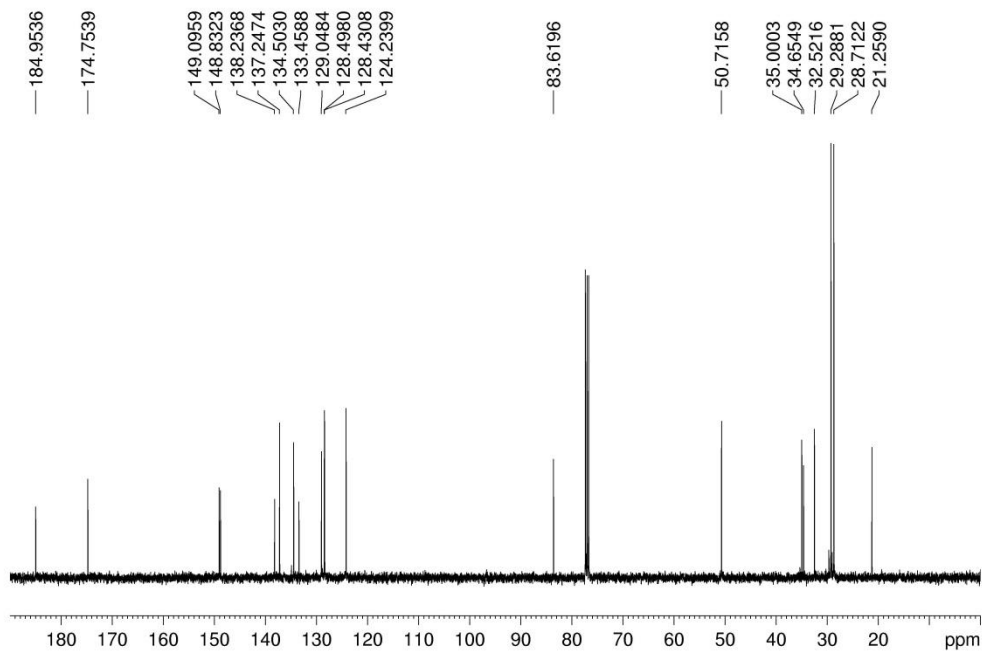

<sup>13</sup>C NMR Spectra of Product 4c

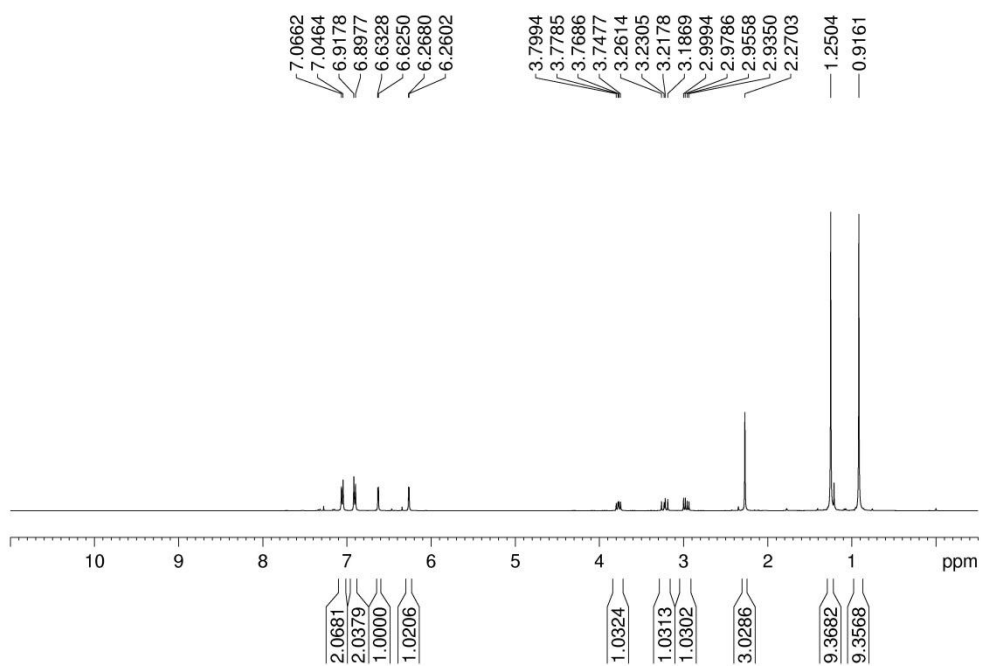

$^1\text{H}$  NMR Spectra of Product **4d**

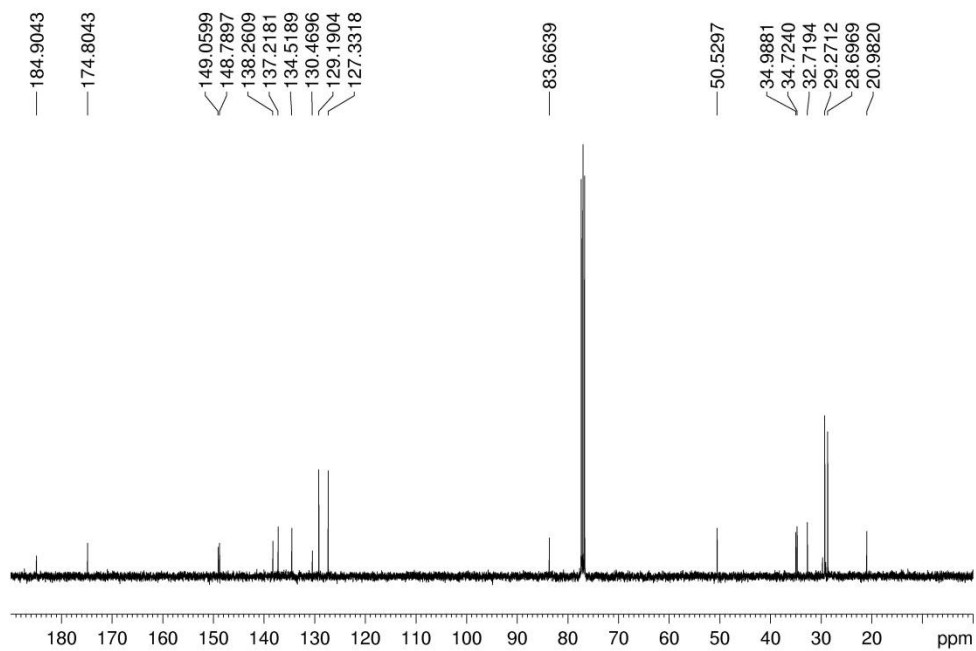

$^{13}\text{C}$  NMR Spectra of Product **4d**

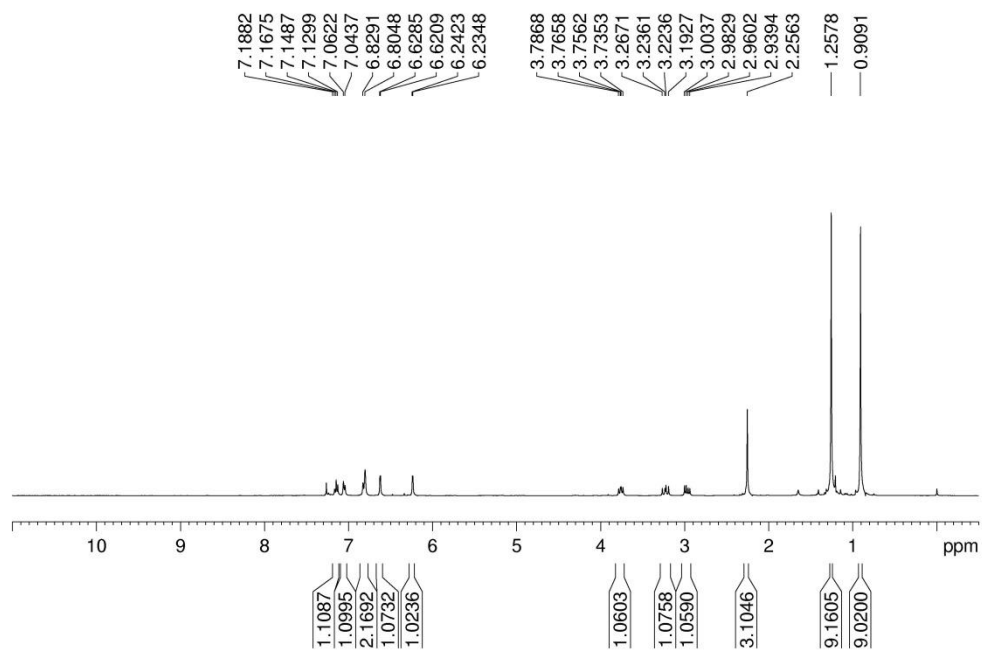

<sup>1</sup>H NMR Spectra of Product 4e

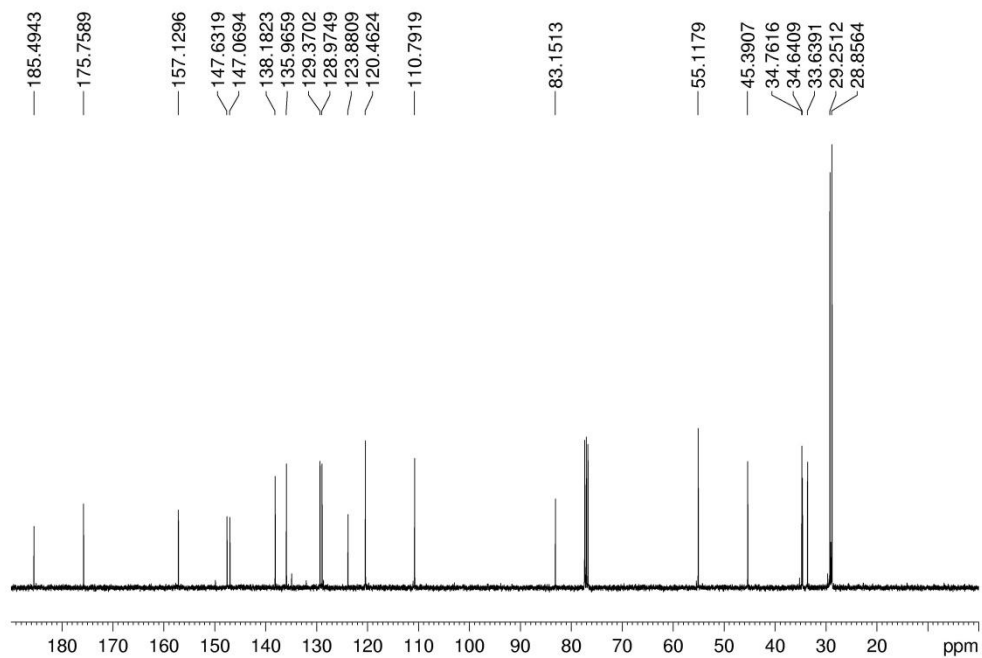

<sup>13</sup>C NMR Spectra of Product 4e

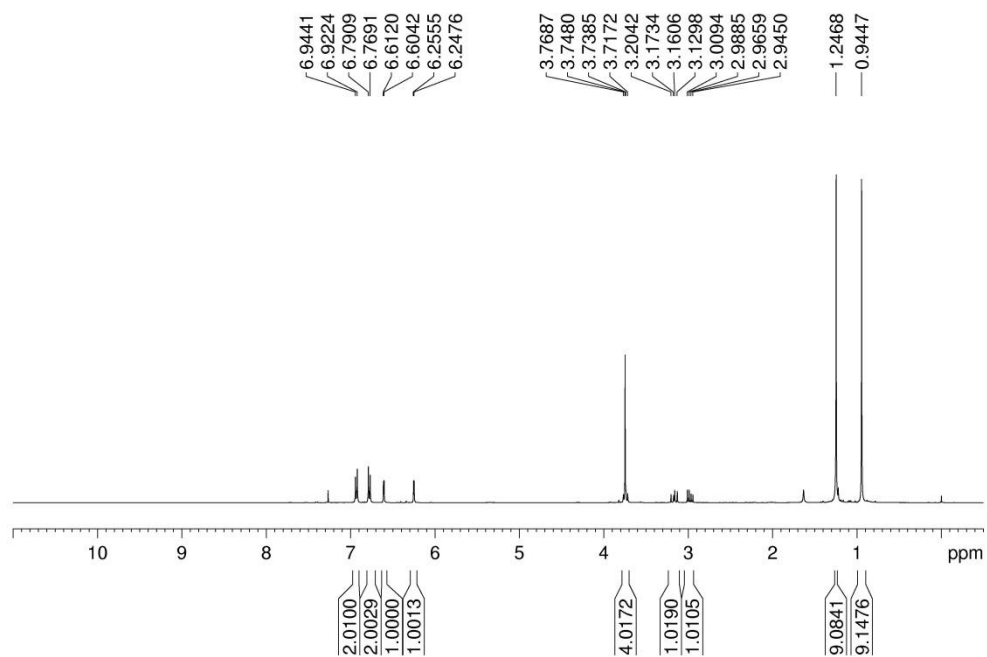

$^1\text{H}$  NMR Spectra of Product **4f**

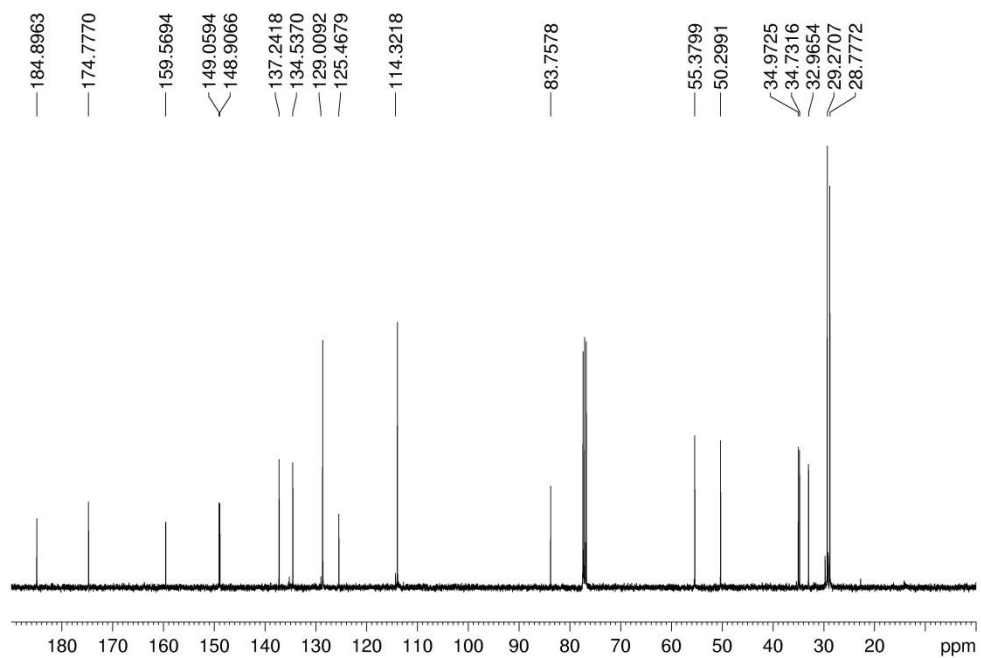

$^{13}\text{C}$  NMR Spectra of Product **4f**

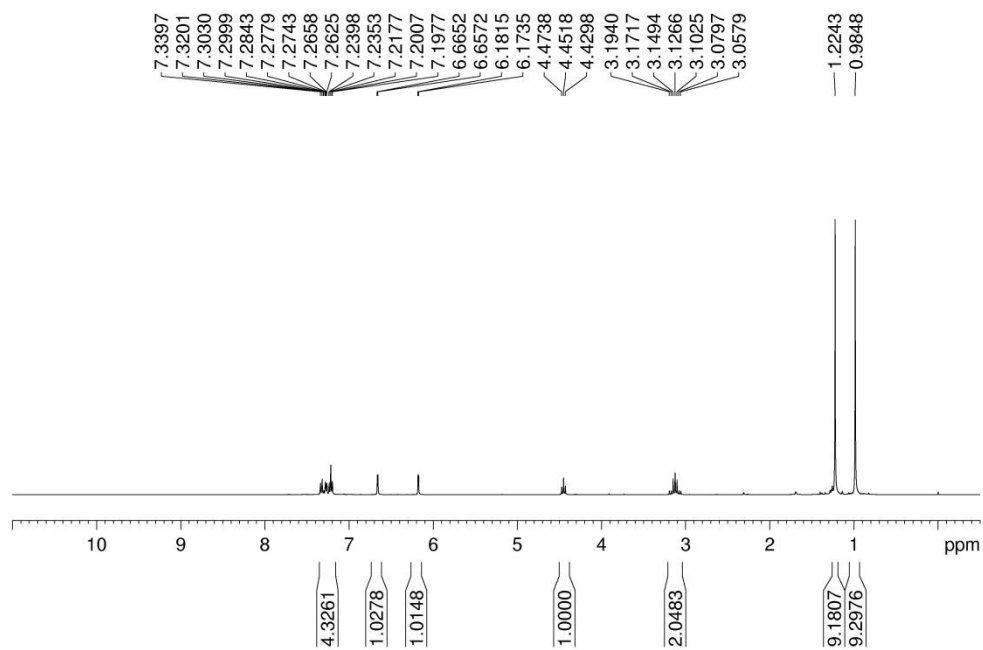

<sup>1</sup>H NMR Spectra of Product **4g**

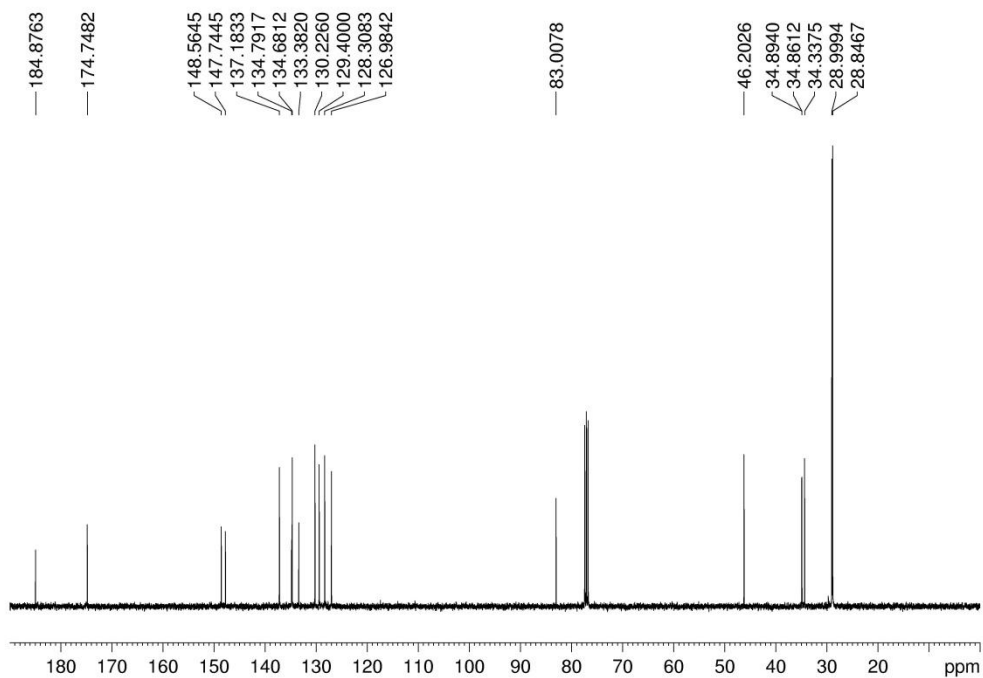

<sup>13</sup>C NMR Spectra of Product **4g**



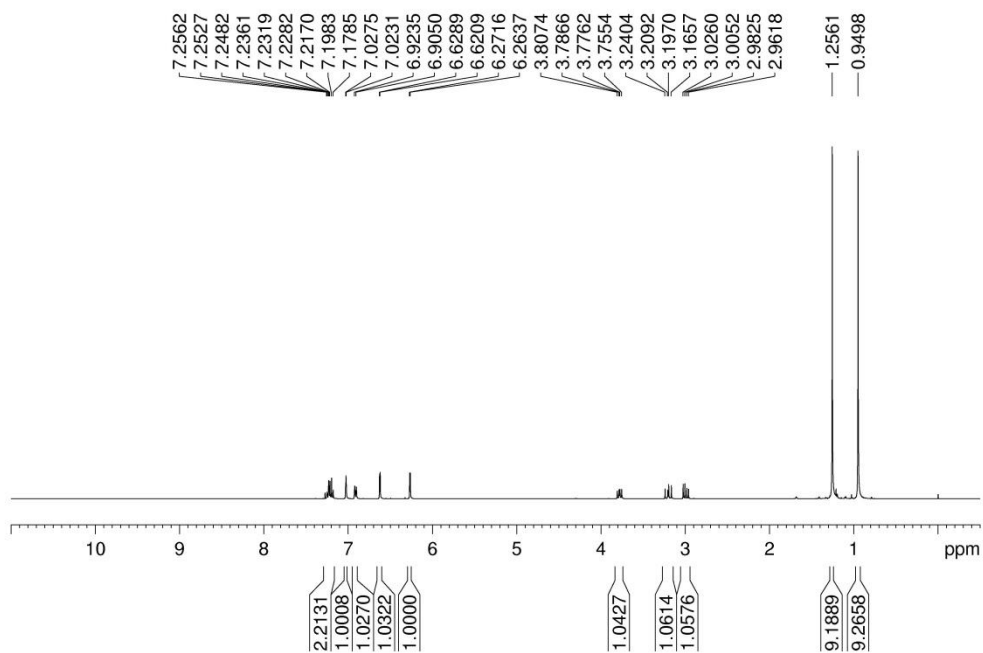

<sup>1</sup>H NMR Spectra of Product **4h**

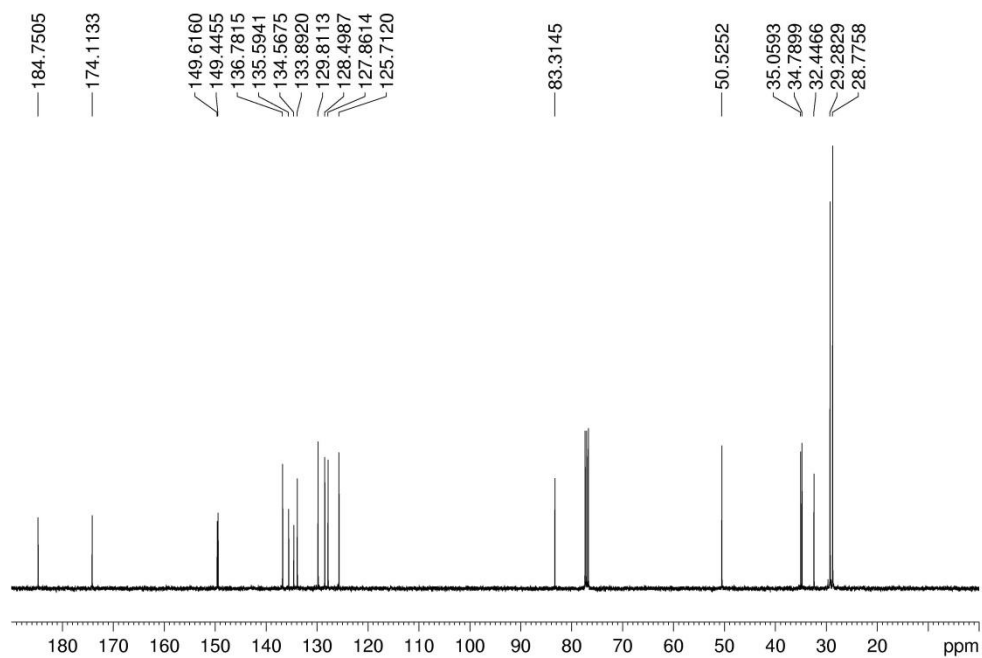

<sup>13</sup>C NMR Spectra of Product **4h**

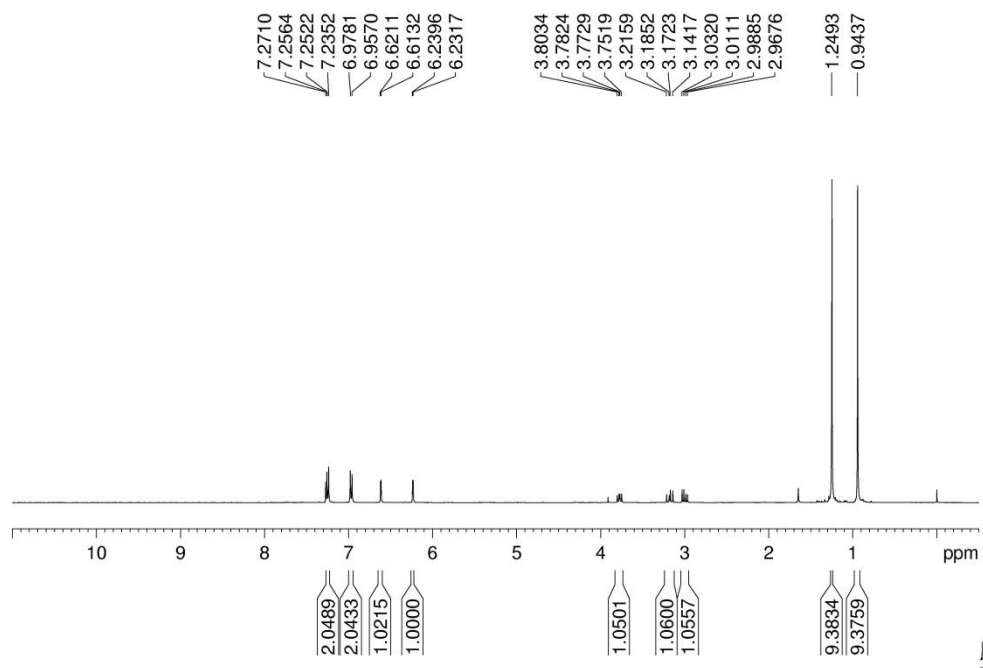

<sup>1</sup>H NMR Spectra of Product **4i**

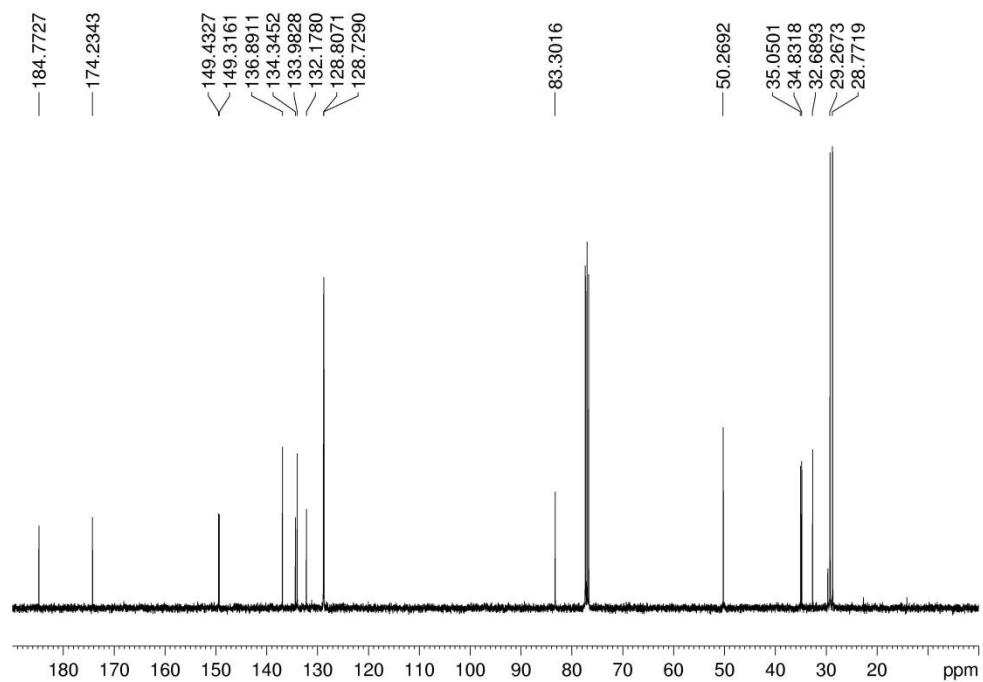

<sup>13</sup>C NMR Spectra of Product **4i**

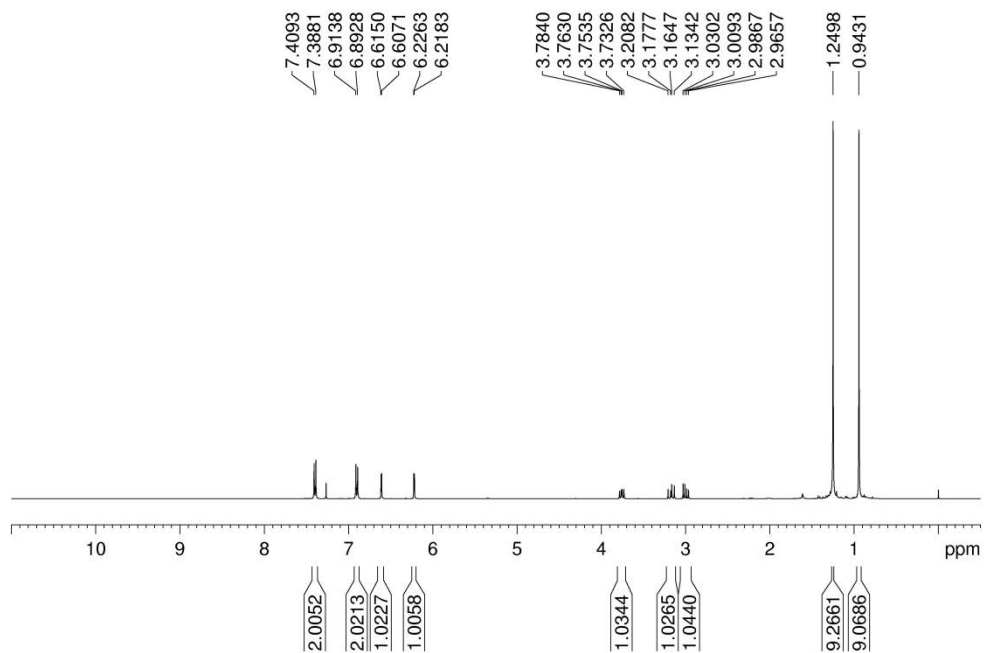

<sup>1</sup>H NMR Spectra of Product 4j

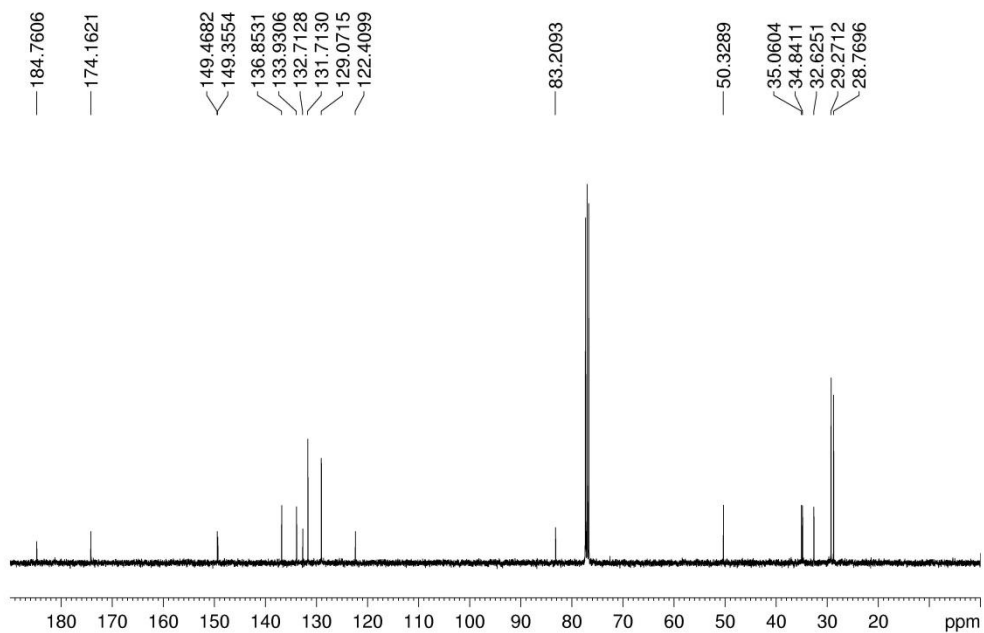

<sup>13</sup>C NMR Spectra of Product 4j

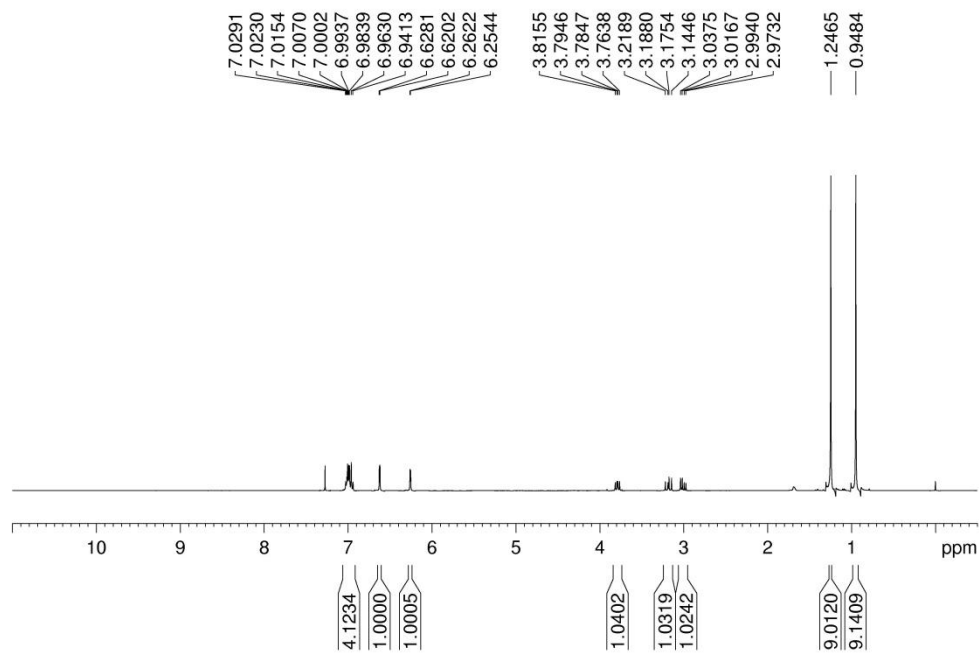

<sup>1</sup>H NMR Spectra of Product **4k**

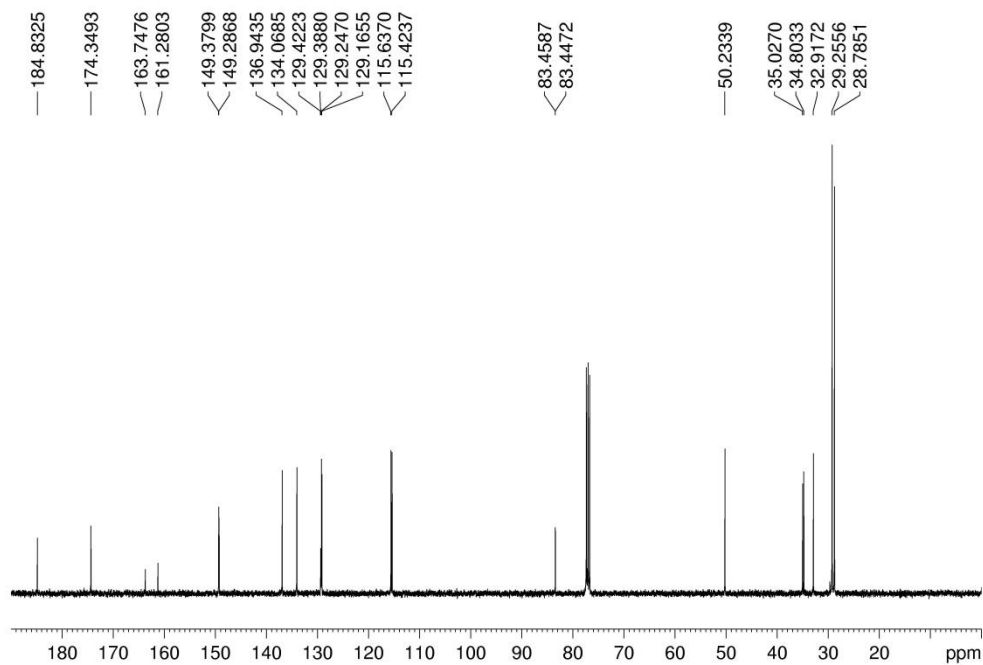

<sup>13</sup>C NMR Spectra of Product **4k**

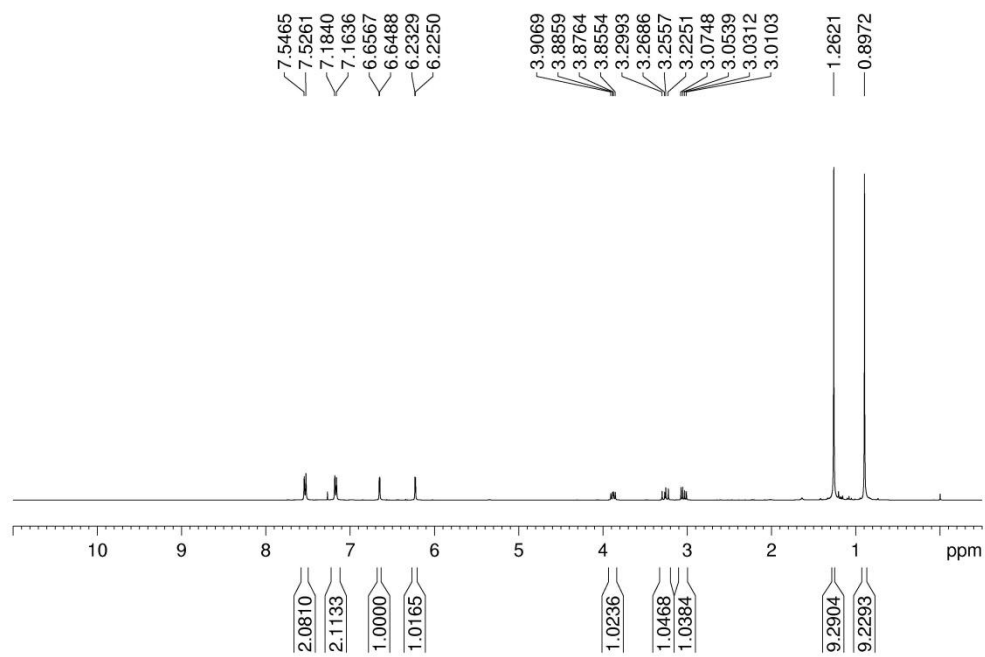

<sup>1</sup>H NMR Spectra of Product 4I

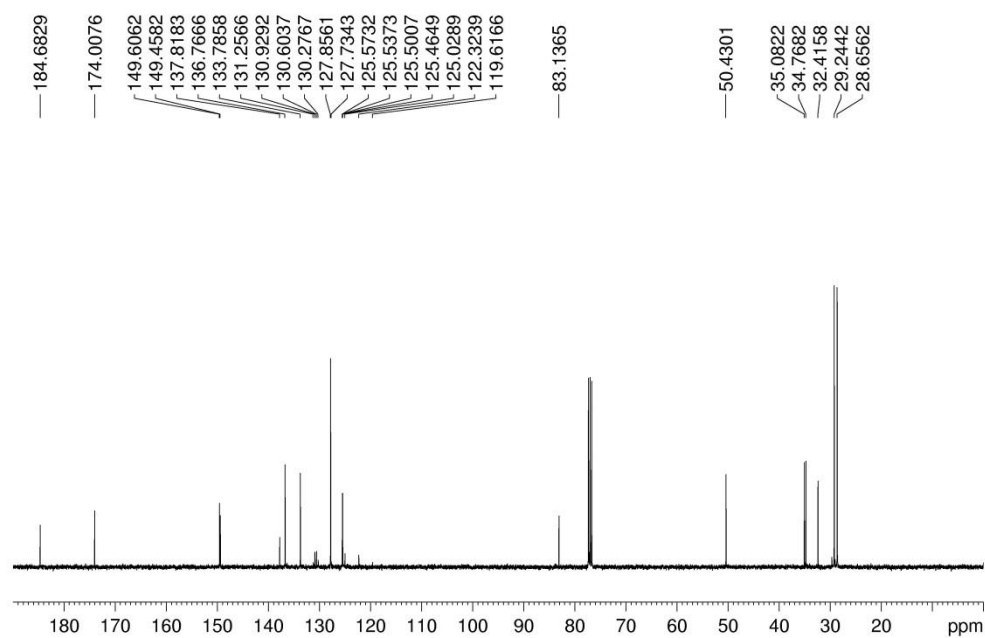

<sup>13</sup>C NMR Spectra of Product 4I

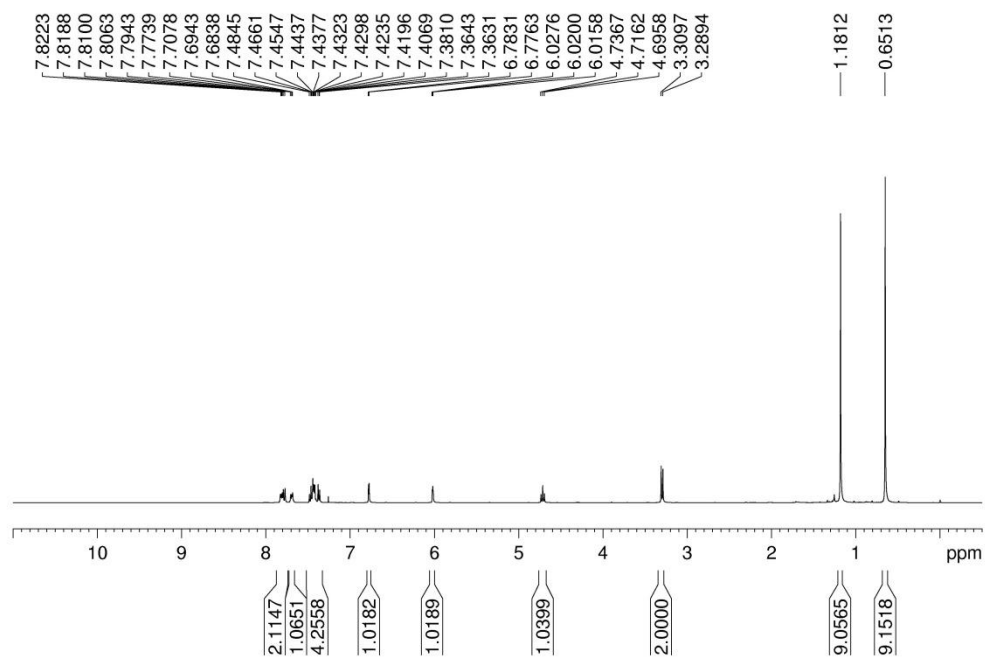

<sup>1</sup>H NMR Spectra of Product **4n**

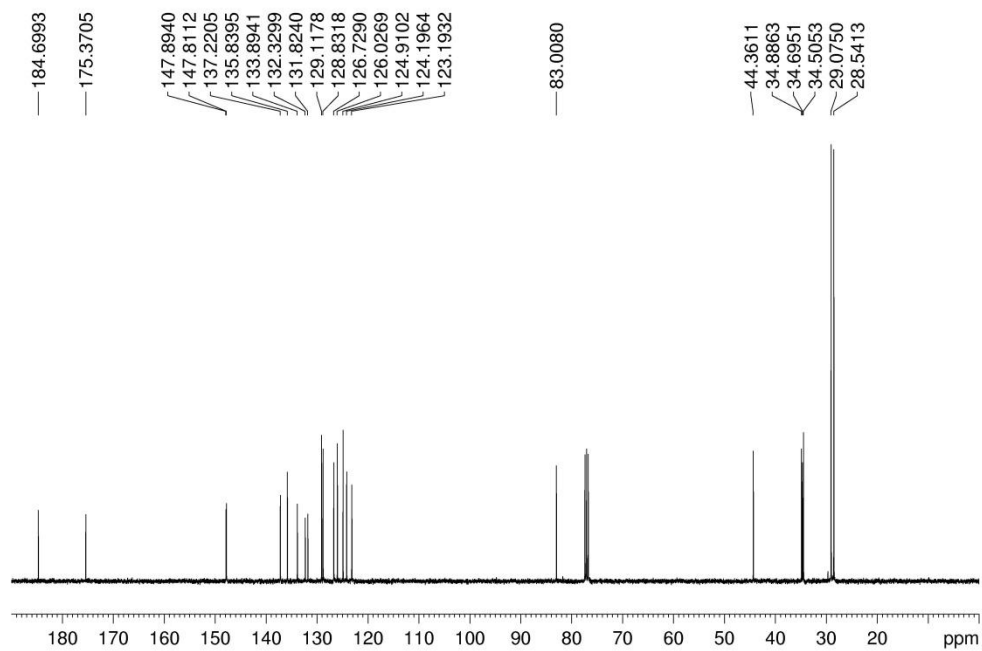

<sup>13</sup>C NMR Spectra of Product **4n**

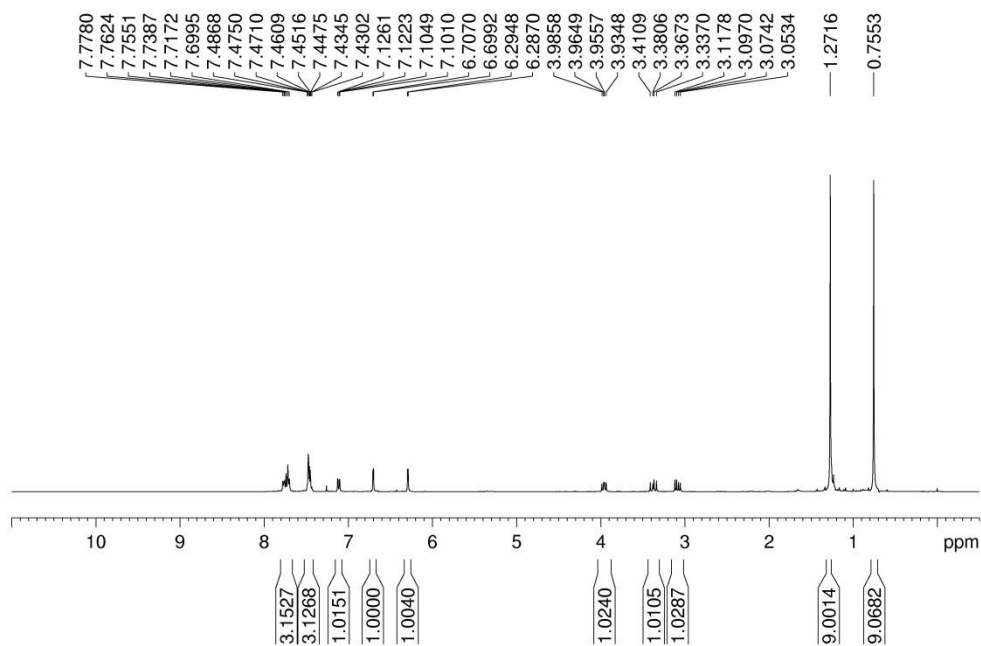

<sup>1</sup>H NMR Spectra of Product **4o**

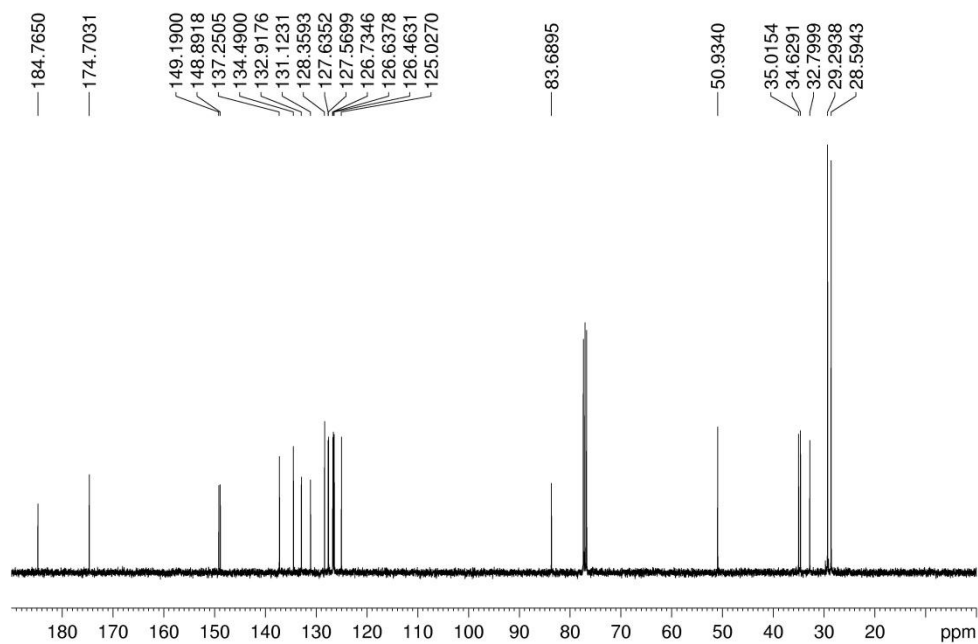

<sup>13</sup>C NMR Spectra of Product **4o**

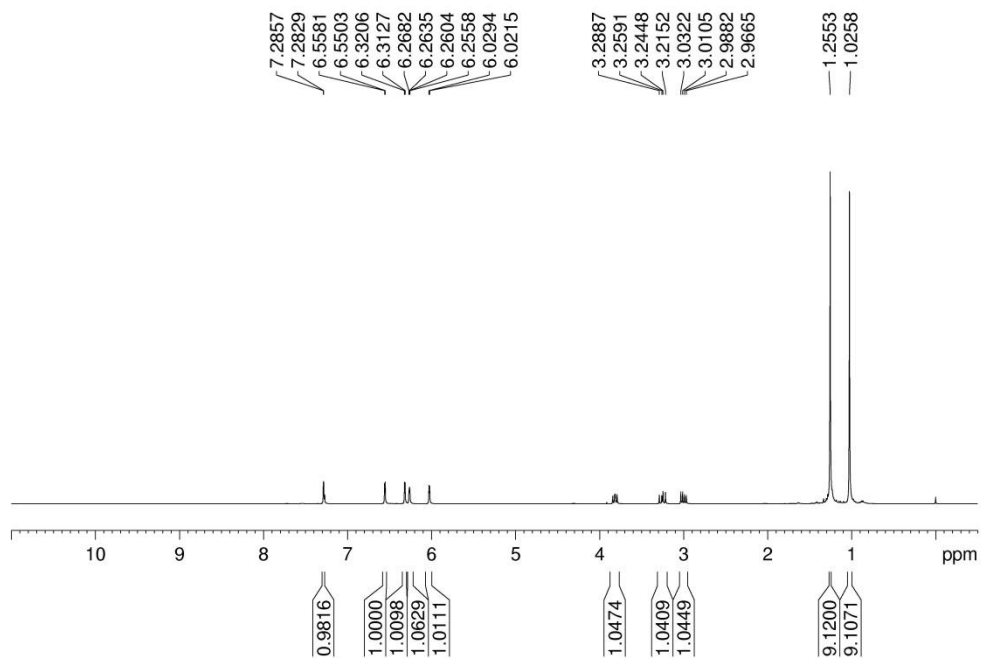

<sup>1</sup>H NMR Spectra of Product **4p**

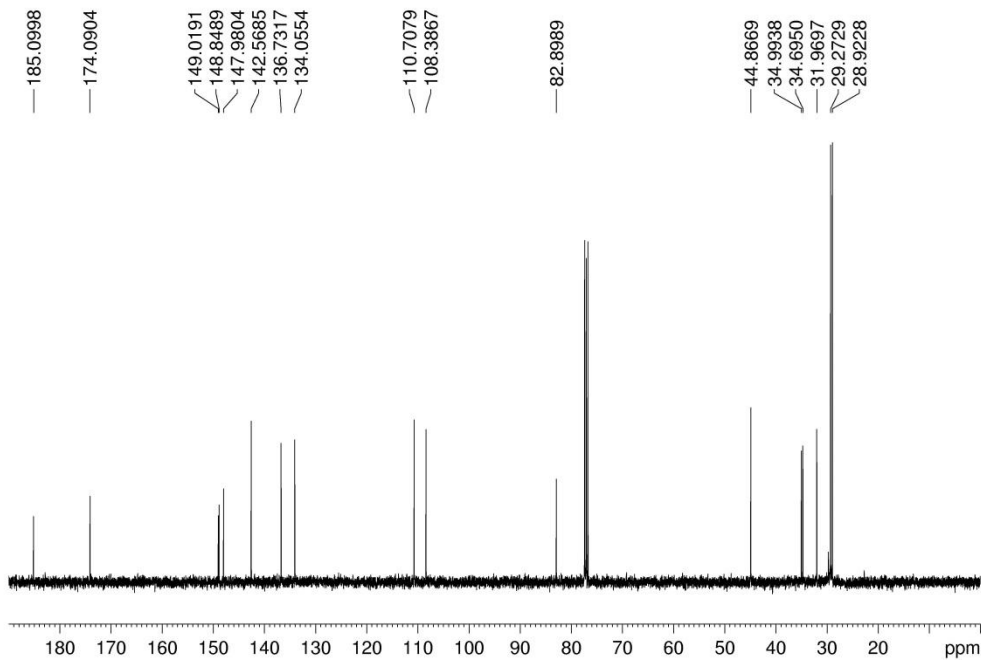

<sup>13</sup>C NMR Spectra of Product **4p**



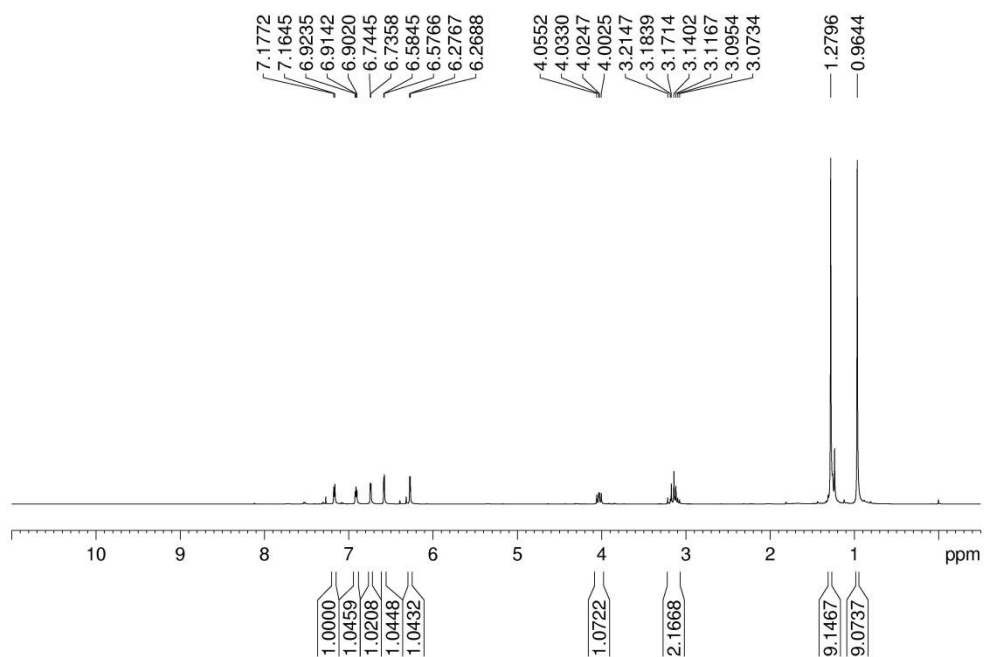

<sup>1</sup>H NMR Spectra of Product **4q**

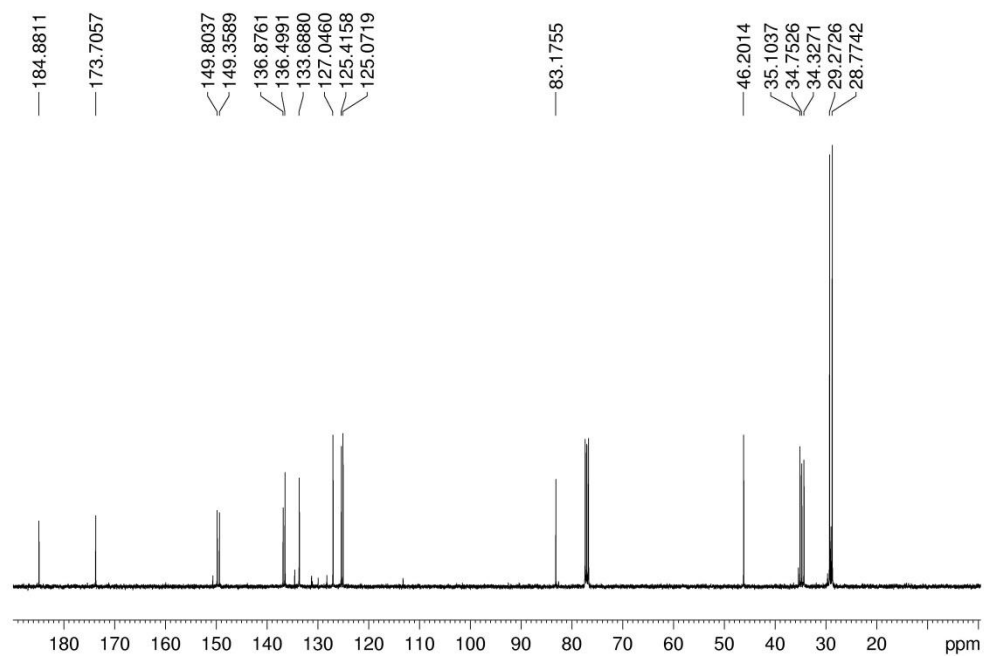

<sup>13</sup>C NMR Spectra of Product **4q**
